# Supplementary material for: Design, synthesis and biological activity evaluation of regioisomeric spiro-(indoline-isoxazolidines) in the inhibition of TNF-α-induced ICAM-1 expression on human endothelial cells
Source: Royal Society of Chemistry journal article supplement (doi:10.1039/c2md20216f), 2012-01-01
Supplement: c2md20216f.pdf [file c2md20216f.pdf]

## Supporting Information

### **Design, synthesis and biological activity evaluation of regioisomeric spiro-(indoline-isoxazolidines) on the inhibition of TNF-alpha induced ICAM-1 expression on human endothelial cells.**

*Shashwat Malhotra,<sup>a,b,¶</sup> Sakshi Balwani,<sup>c,¶</sup> Ashish Dhawan,<sup>a</sup> Raunak,<sup>a</sup> Yogesh Kumar,<sup>a</sup> Brajendra K. Singh,<sup>a</sup> Carl E. Olsen,<sup>d</sup> Ashok K. Prasad,<sup>a</sup> Virinder S. Parmar<sup>a\*</sup> and Balaram Ghosh<sup>c\*</sup>*

<sup>a</sup>*Bioorganic Laboratory, Department of Chemistry, University of Delhi, Delhi-110 007, India.*

<sup>b</sup>*Institut für Chemie und Biochemie, Freie Universität Berlin, Takustr. 3, 14195 Berlin, Germany.*

<sup>c</sup>*CSIR-Institute of Genomics and Integrative Biology, Mall Road, Delhi- 110 007, India.*

<sup>d</sup>*Department of Basic Sciences and Environment, University of Copenhagen, DK-1871 Frederiksberg C, Denmark.*

<sup>¶</sup> Authors contributed equally to this work

To whom correspondence should be addressed:

Dr. Balaram Ghosh

Molecular Immunogenetics Laboratory, CSIR-Institute of Genomics and Integrative Biology  
University of Delhi Campus (North), Mall Road, Delhi 110 007, India.  
Tel.: 91-11-27662580, Fax: 91-11-27667471, E-mail: bghosh@igib.res.in

Professor Virinder S. Parmar  
Department of Chemistry, University of Delhi, Delhi-110 007  
Tel: 91-11-27666555; Fax: +91-11-27667206  
Email: virparmar@gmail.com

**Table of contents:**

**(S3-S24):** Spectroscopic data ( $^1\text{H}$  and  $^{13}\text{C}$  NMR) of potent novel final compounds **9k**, **9l**, **9n**, **9o**, **9p**, **9q**, **9c**, **9e**, **9h**, **7k** and **7l**

**(S25-S68):** HPLC purity information of novel final compounds **9a**, **9c**, **9h-9q**, **9s**, **7k**, **7l** and selected known final compounds **10b**, **10c**, **10g**, **10h**, **8b**, **8c**, **8g**, **8h**, **8j**.

S25. HPLC purity data of novel final compounds **9a**, **9c**, **9h-9q**, **9s**, **7k**, **7l** and selected known final compounds **10b**, **10c**, **10g**, **10h**, **8b**, **8c**, **8g**, **8h**, **8j** in tabular form.

S26-S59. HPLC chromatograms of novel final compounds **9a**, **9c**, **9h-9q**, **9s** and **7k-7l** in two solvent systems (80:20 Methanol / water and 80:20 Acetonitrile / Water).

S60-S68. HPLC chromatograms of selected known final compounds **10b**, **10c**, **10g**, **10h**, **8b**, **8c**, **8g**, **8h**, and **8j** (in 80:20 Acetonitrile / Water).

**(S69-S84):** 2D (cosy, hsqc, hmbc) and 1D (NOESY) NMR spectra for compounds **10c**, **8d**, **9l** and **7l**.

<sup>1</sup>H NMR (Bruker AC-300 Avance, 300 MHz, CDCl<sub>3</sub>) of compound 9k

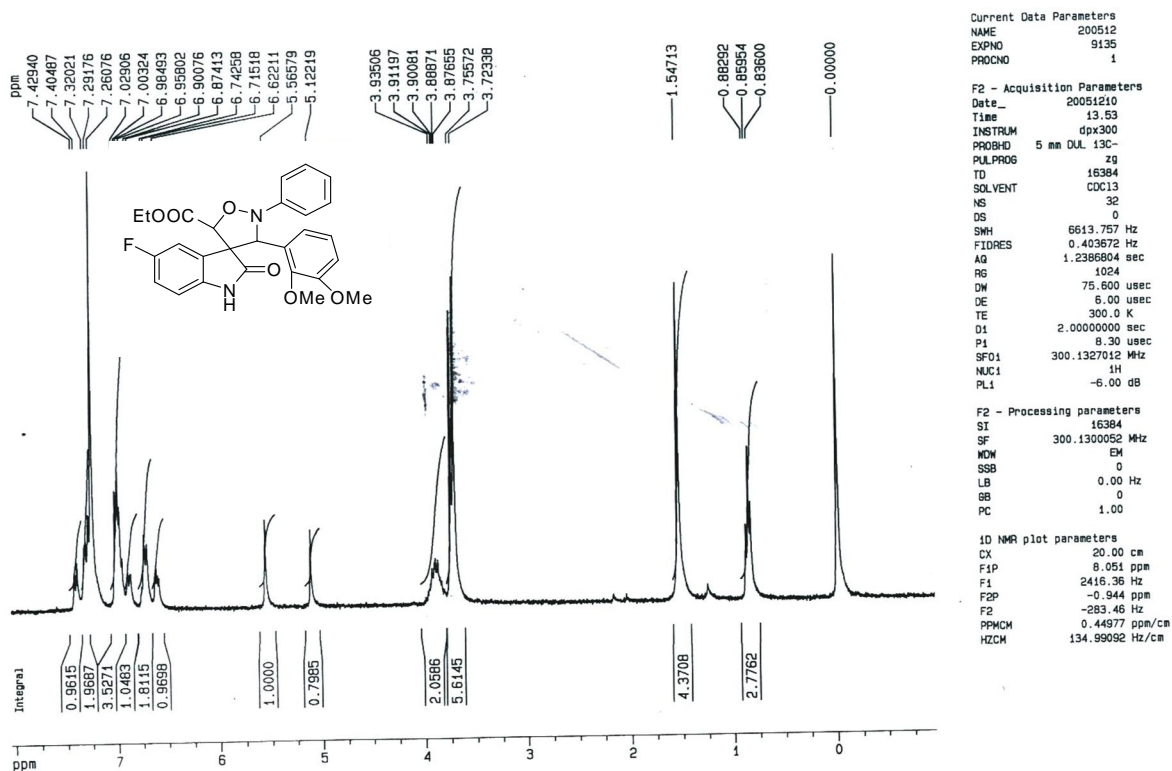

<sup>13</sup>C NMR (Bruker AC-300 Avance, 75.5 MHz, CDCl<sub>3</sub>) of compound 9k

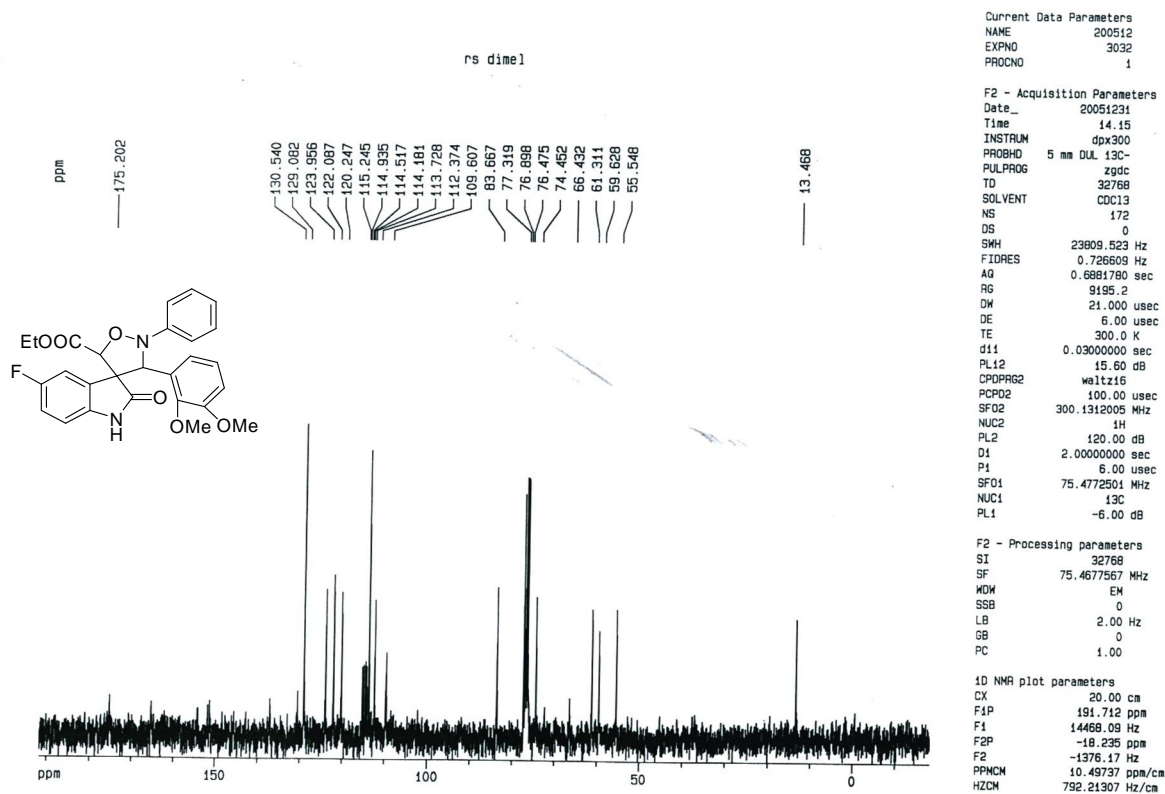

<sup>1</sup>H NMR (Bruker AC-300 Avance, 300 MHz, CDCl<sub>3</sub>) of compound 9l

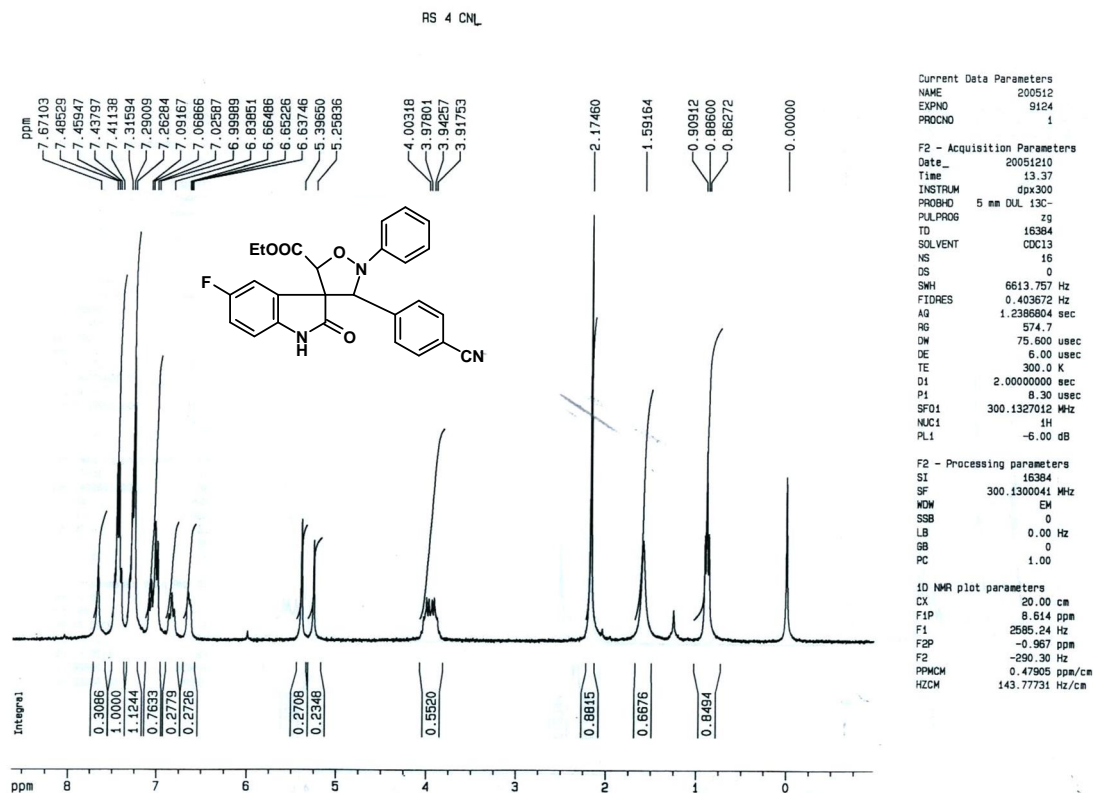

**$^{13}\text{C}$  NMR (Bruker AC-300 Avance, 75.5 MHz,  $\text{CDCl}_3$ ) of compound 9I**

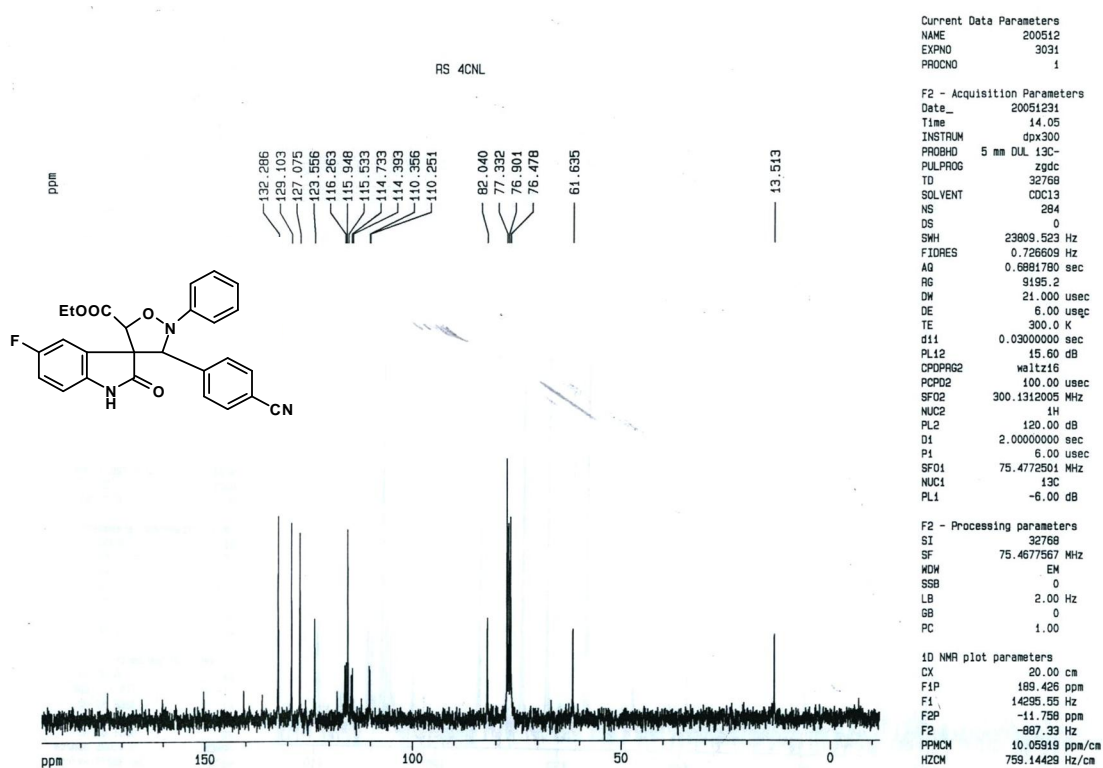

<sup>1</sup>H NMR (Bruker AC-300 Avance, 300 MHz, CDCl<sub>3</sub>) of compound 9n

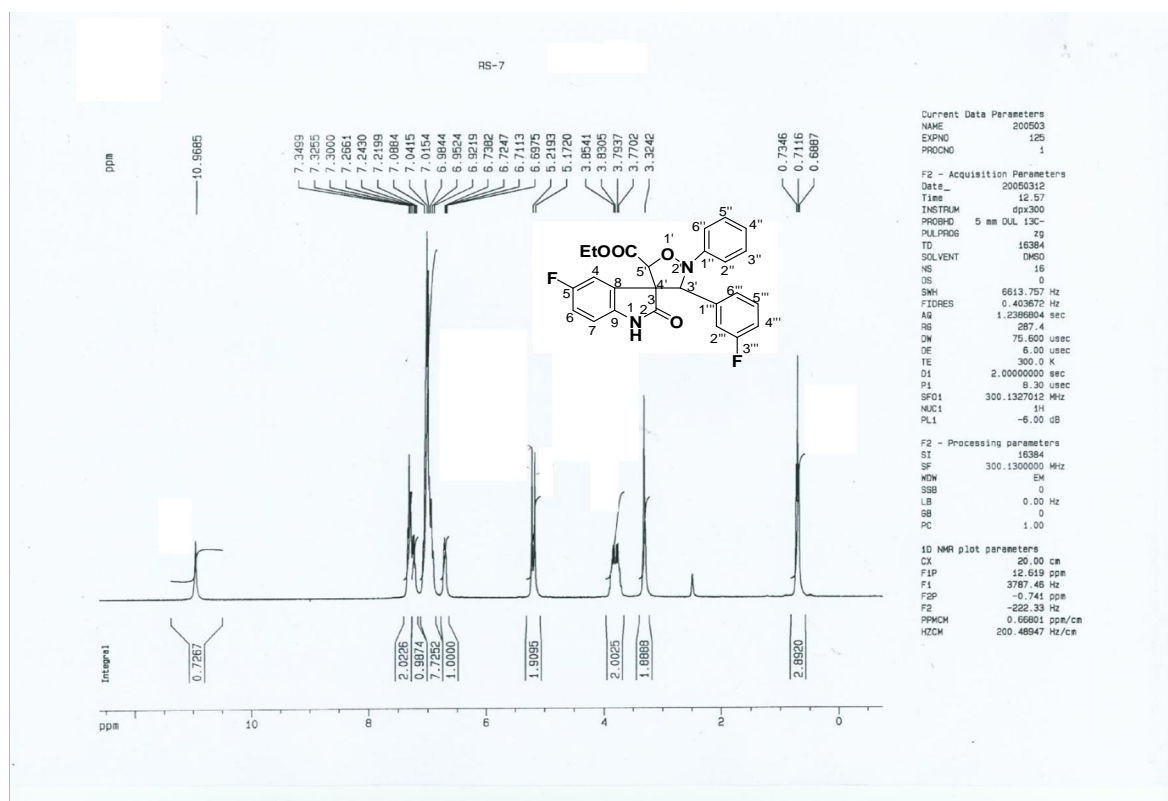

<sup>13</sup>C NMR (Bruker AC-300 Avance, 75.5 MHz, DMSO) of compound 9n

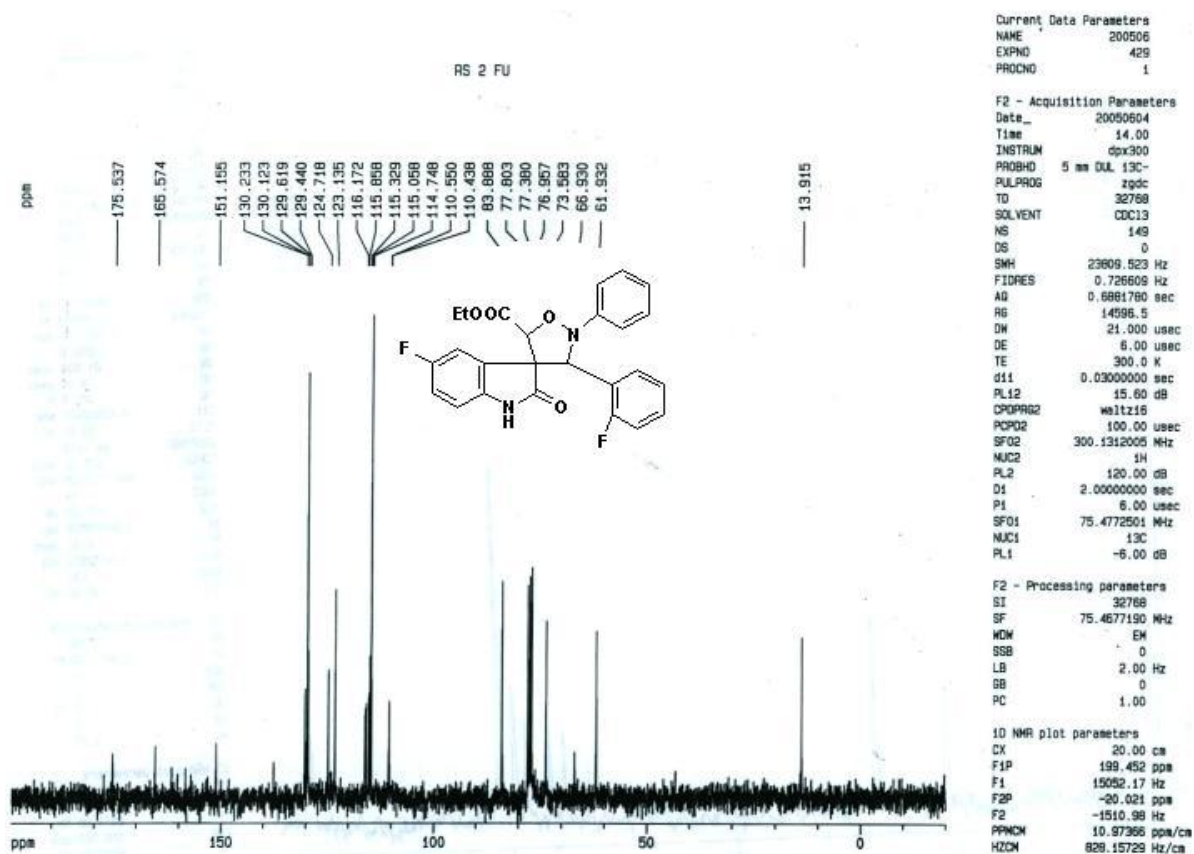



<sup>1</sup>H NMR (Bruker AC-300 Avance, 300 MHz, DMSO) of compound 9o

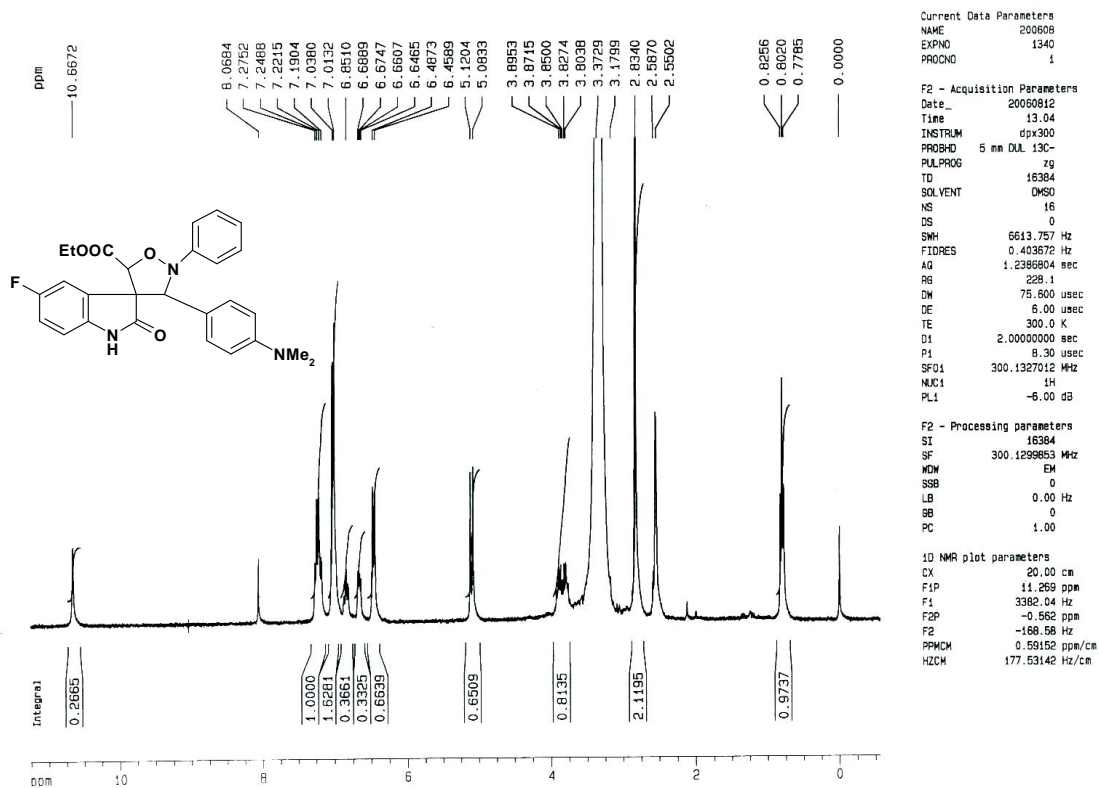

<sup>13</sup>C NMR (Bruker AC-300 Avance, 75.5 MHz, DMSO) of compound 9o

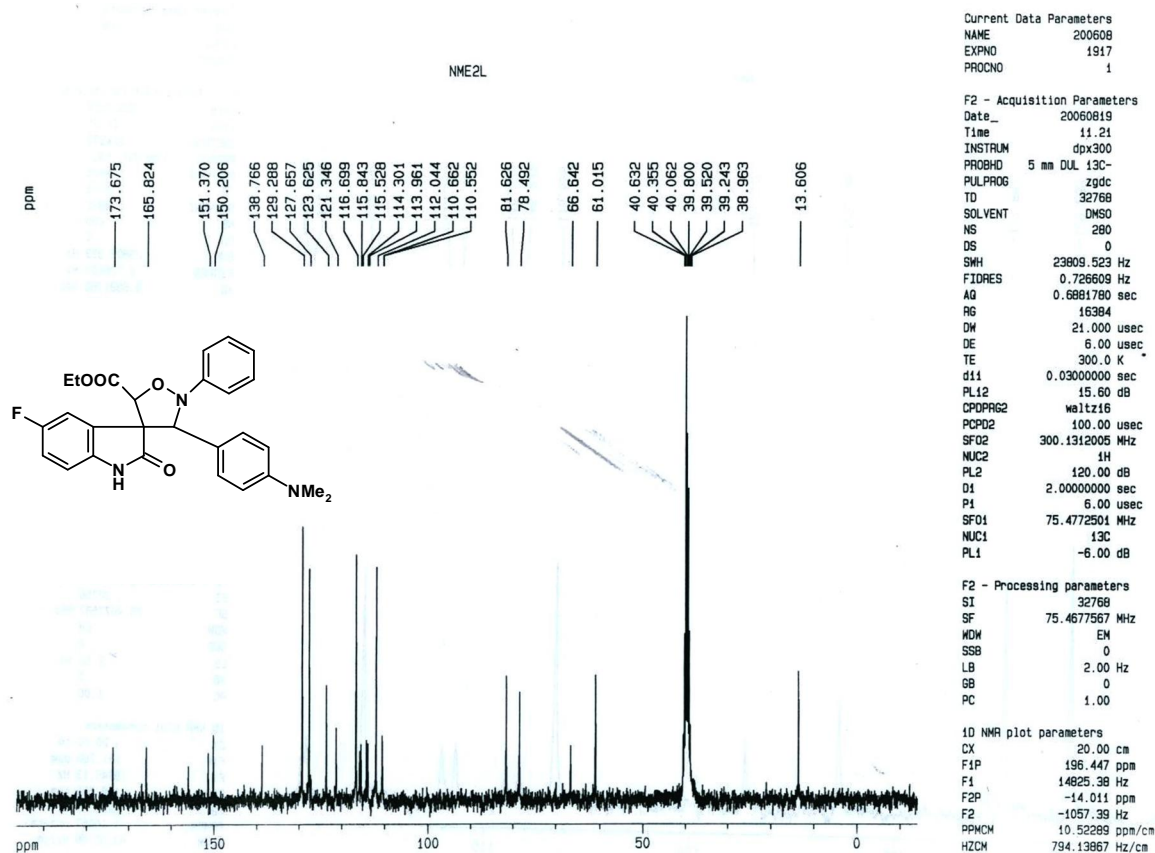

<sup>1</sup>H NMR (Bruker AC-300 Avance, 300 MHz, DMSO) of compound 9p

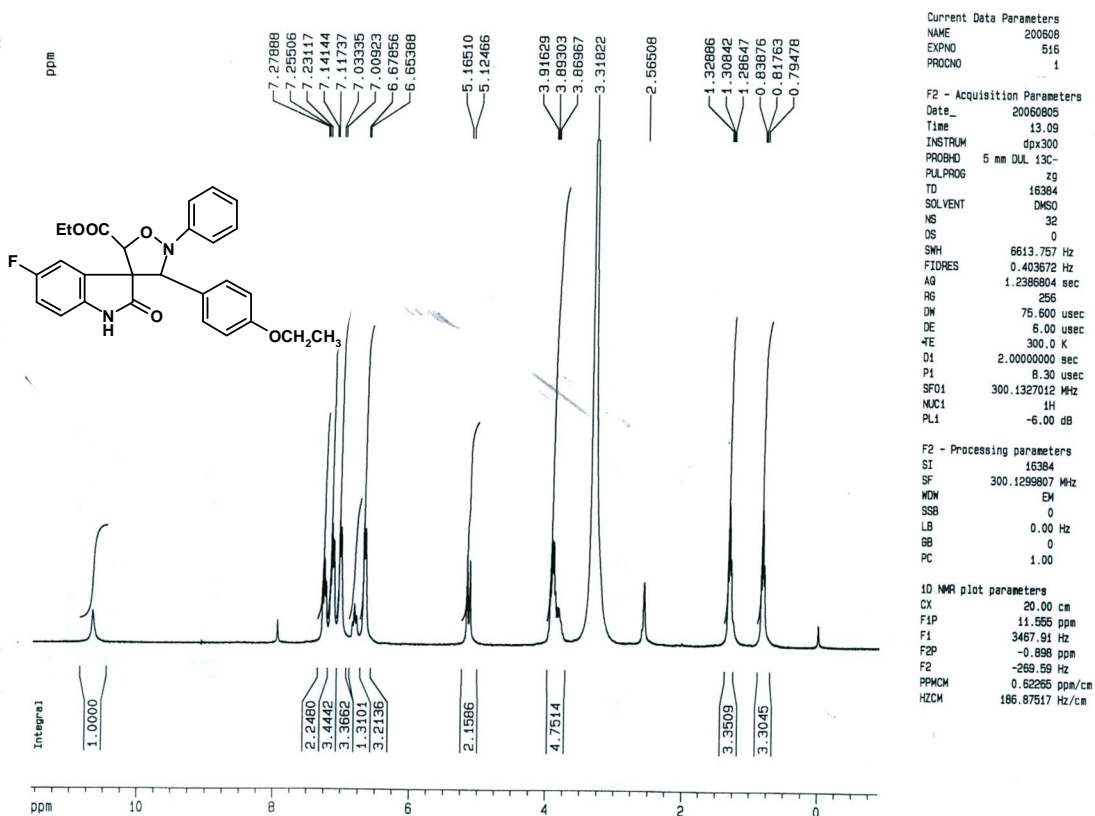

<sup>13</sup>C NMR (Bruker AC-300 Avance, 75.5 MHz, CDCl<sub>3</sub>) of compound 9p

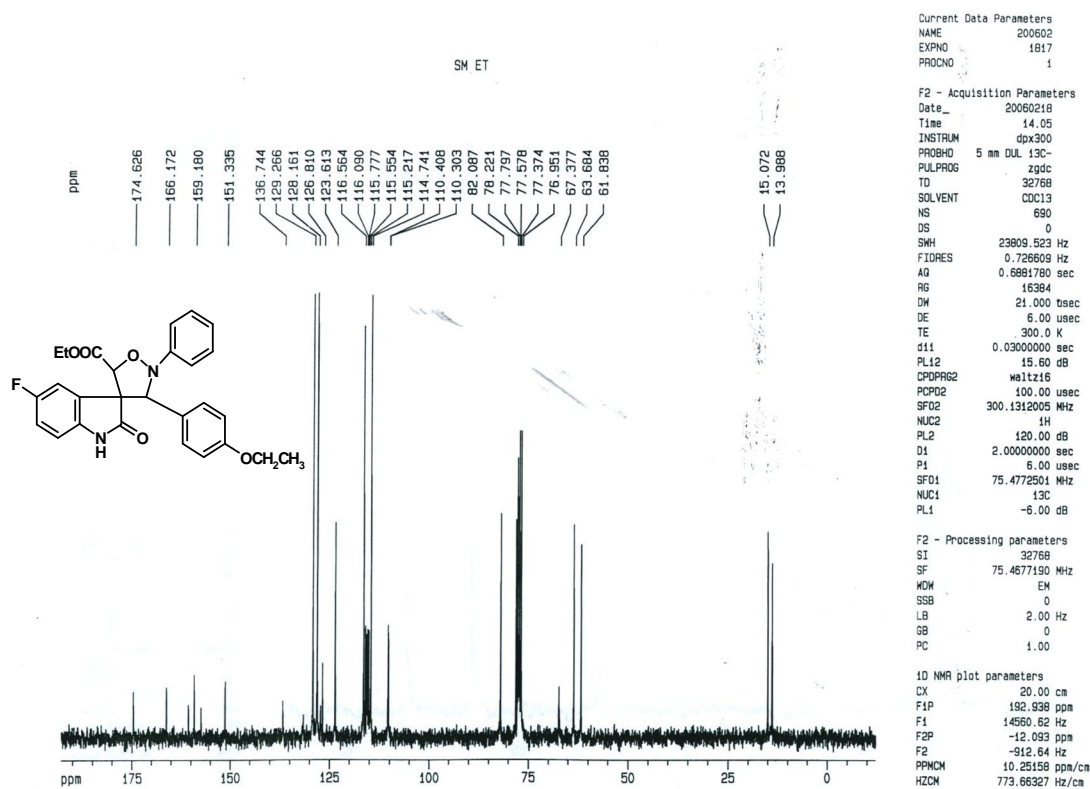

**<sup>1</sup>H NMR (Bruker AC-300 Avance, 300 MHz, mixture of CDCl<sub>3</sub> and DMSO) of compound 9q**

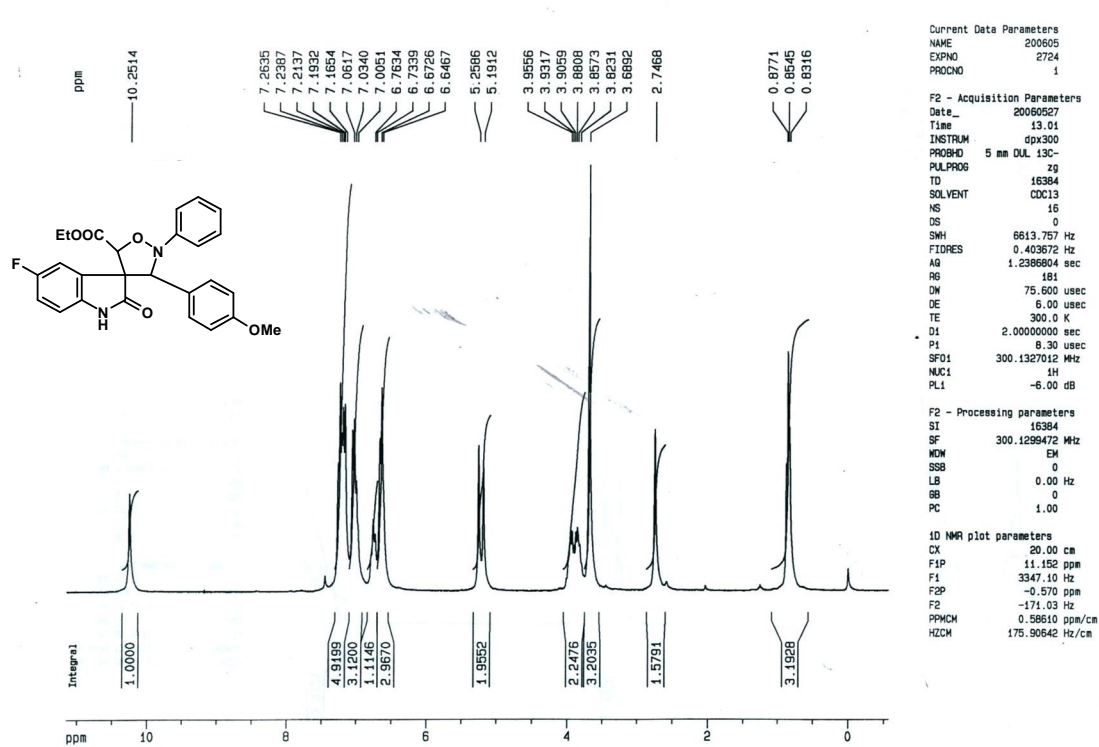

**<sup>13</sup>C NMR (Bruker AC-300 Avance, 75.5 MHz, mixture of CDCl<sub>3</sub> and DMSO) of compound 9q**

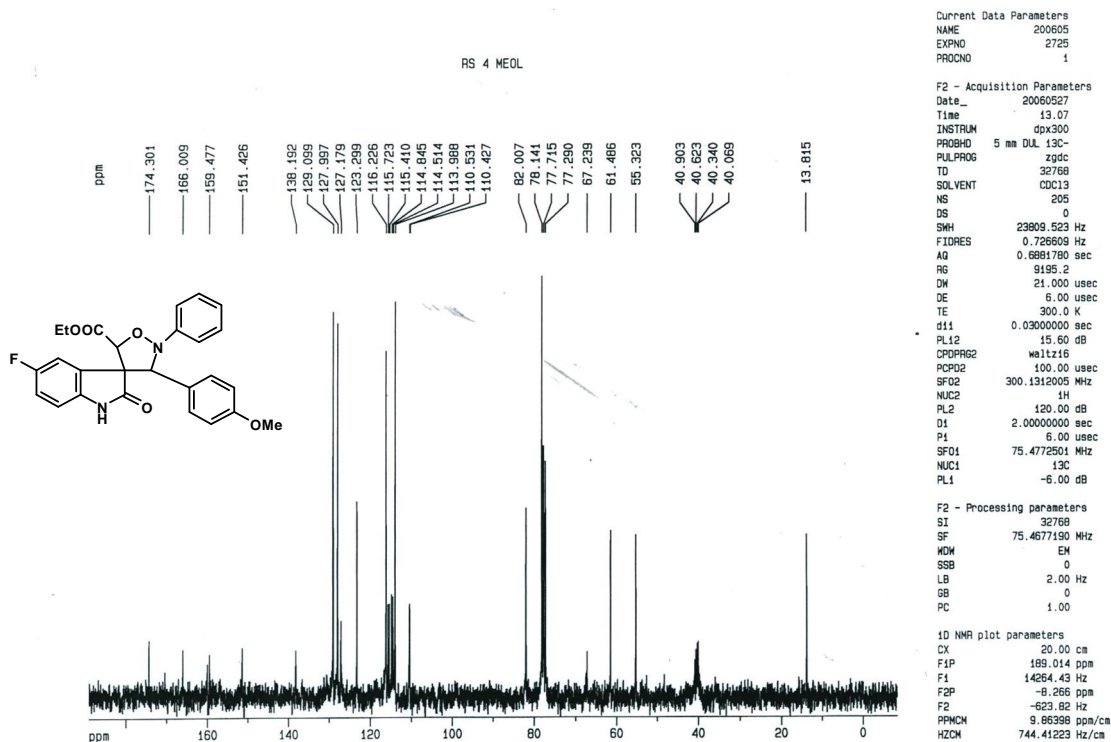

<sup>1</sup>H NMR (Bruker AC-300 Avance, 300 MHz, DMSO) of compound 9c

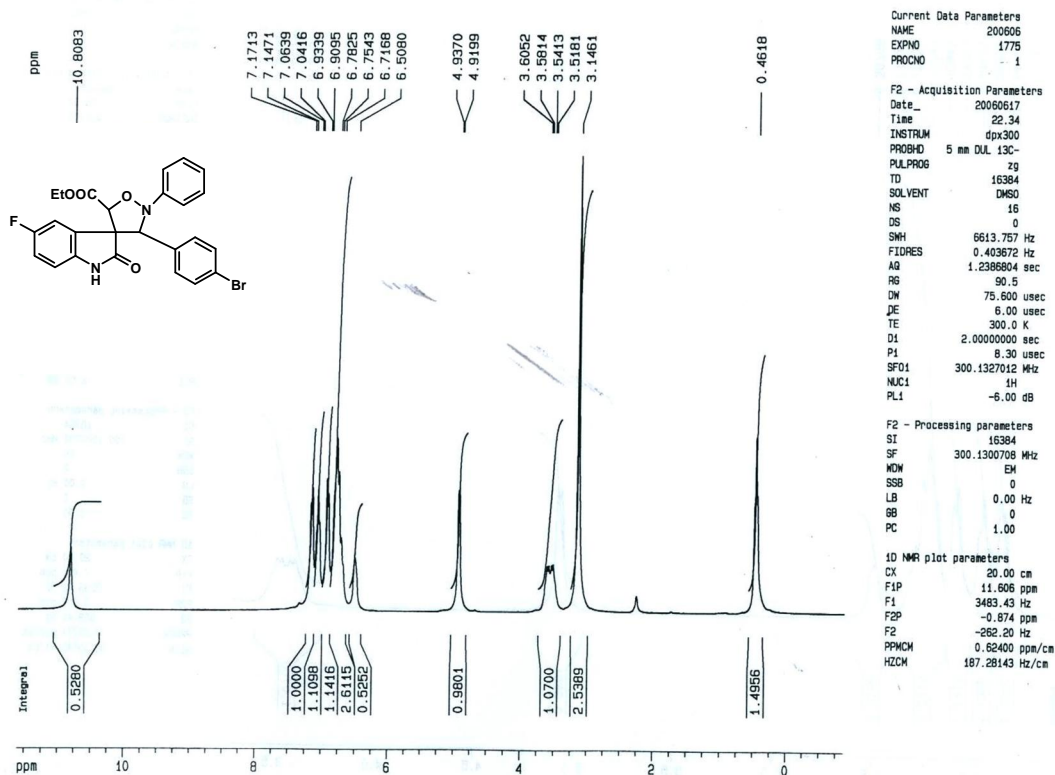

<sup>13</sup>C NMR (Bruker AC-300 Avance, 75.5 MHz, DMSO) of compound 9c

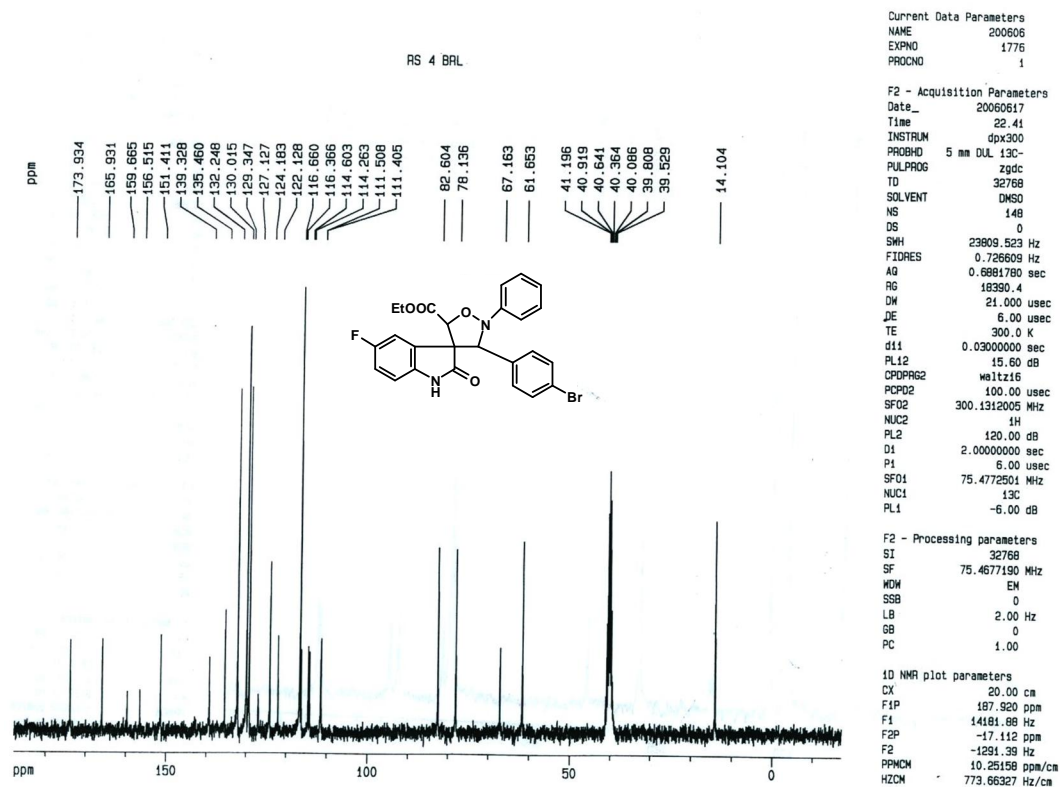



<sup>1</sup>H NMR (Bruker AC-300 Avance, 300 MHz, DMSO) of compound 9e

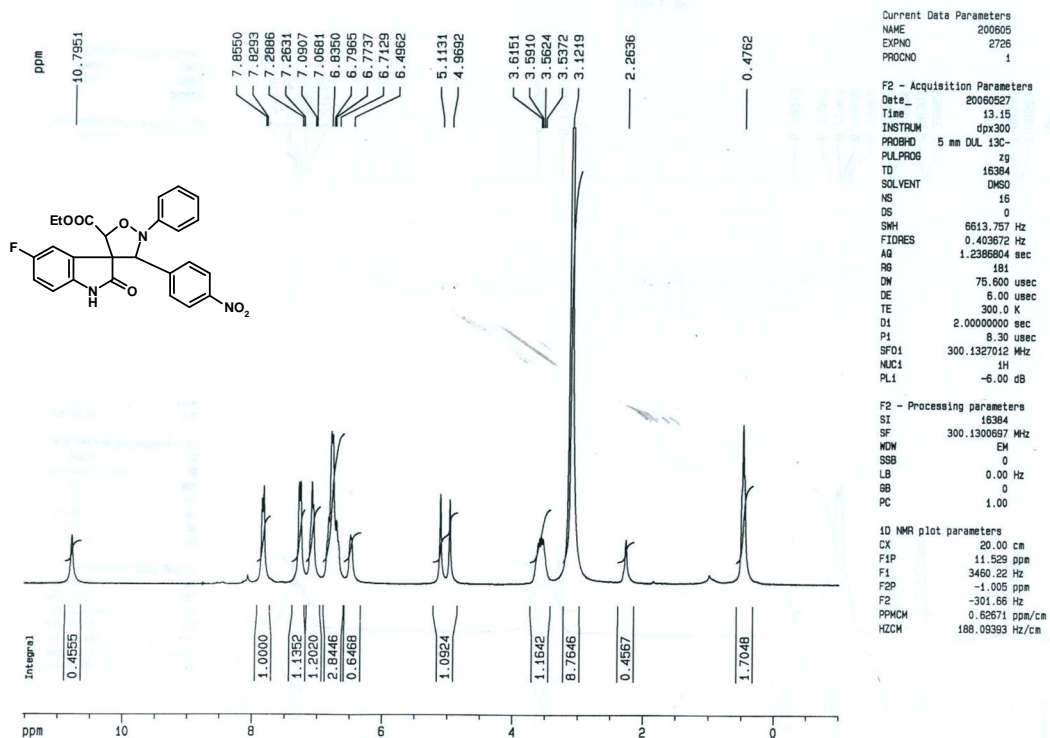

<sup>13</sup>C NMR (Bruker AC-300 Avance, 75.5 MHz, DMSO) of compound 9e

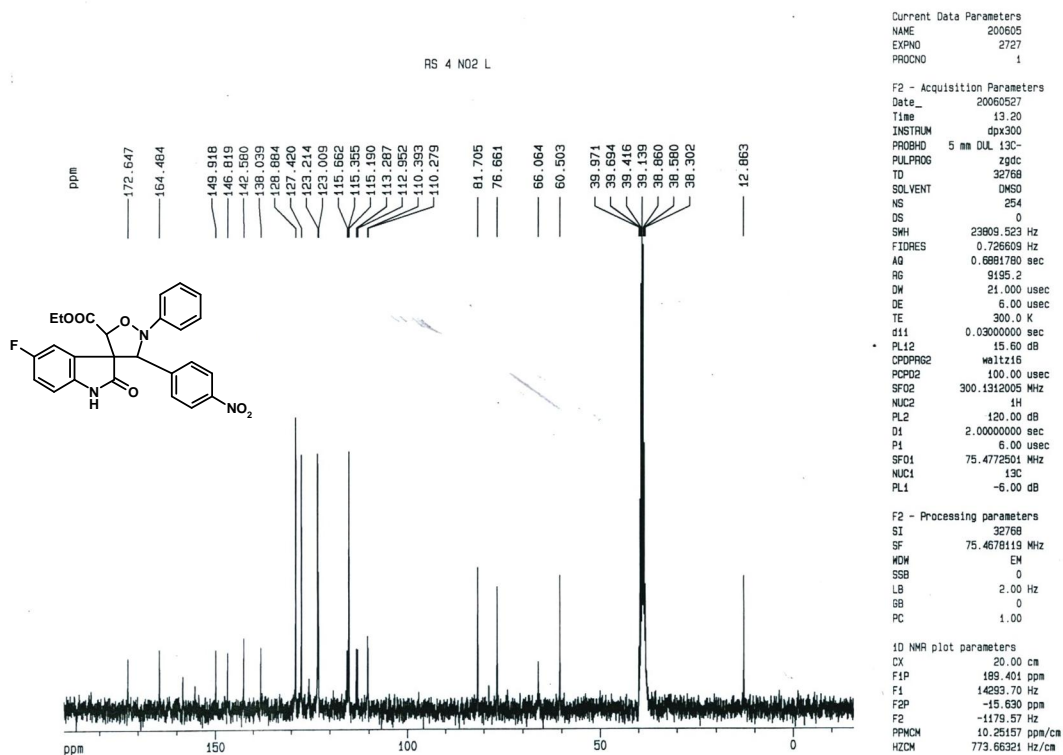

<sup>1</sup>H NMR (Bruker AC-300 Avance, 300 MHz, DMSO) of compound 9h

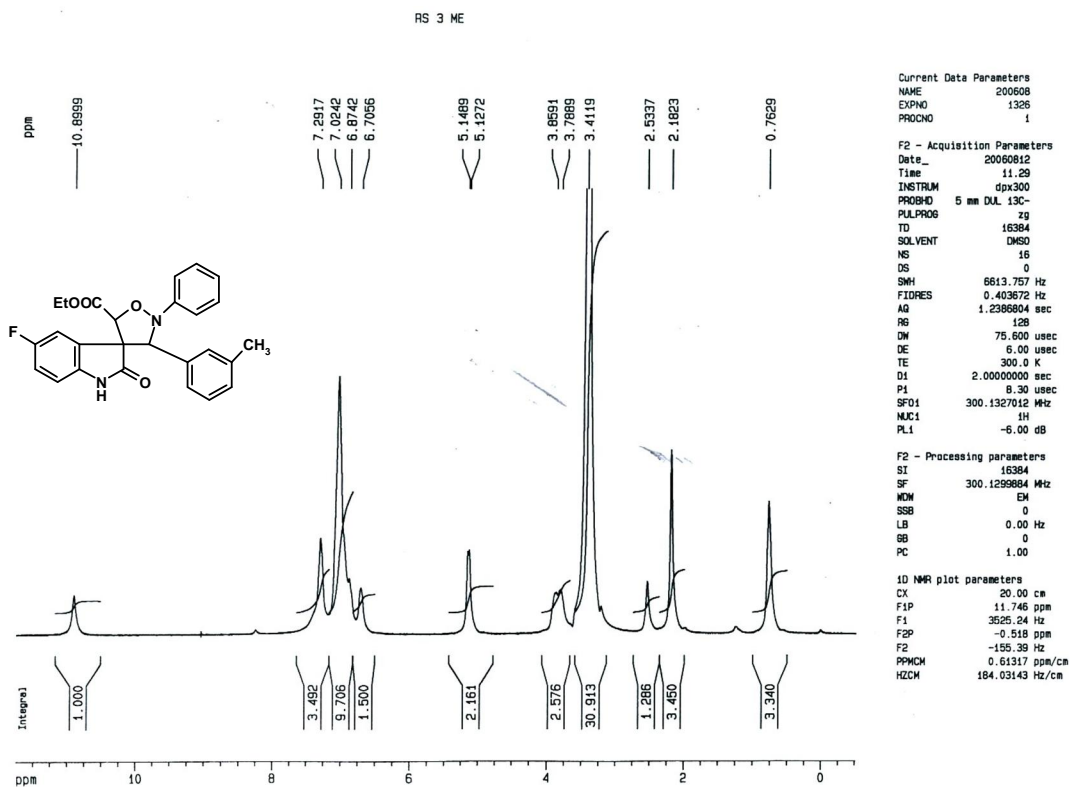

<sup>13</sup>C NMR (Bruker AC-300 Avance, 75.5 MHz, CDCl<sub>3</sub>) of compound 9h

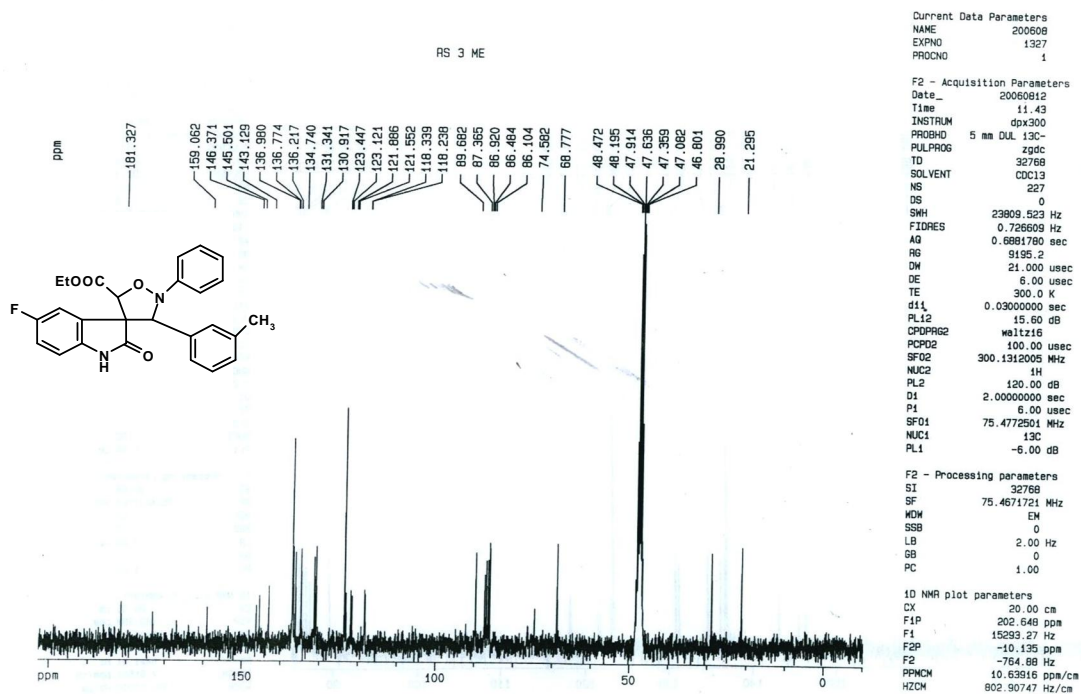

<sup>1</sup>H NMR (Bruker AC-300 Avance, 300 MHz, DMSO) of compound 7k

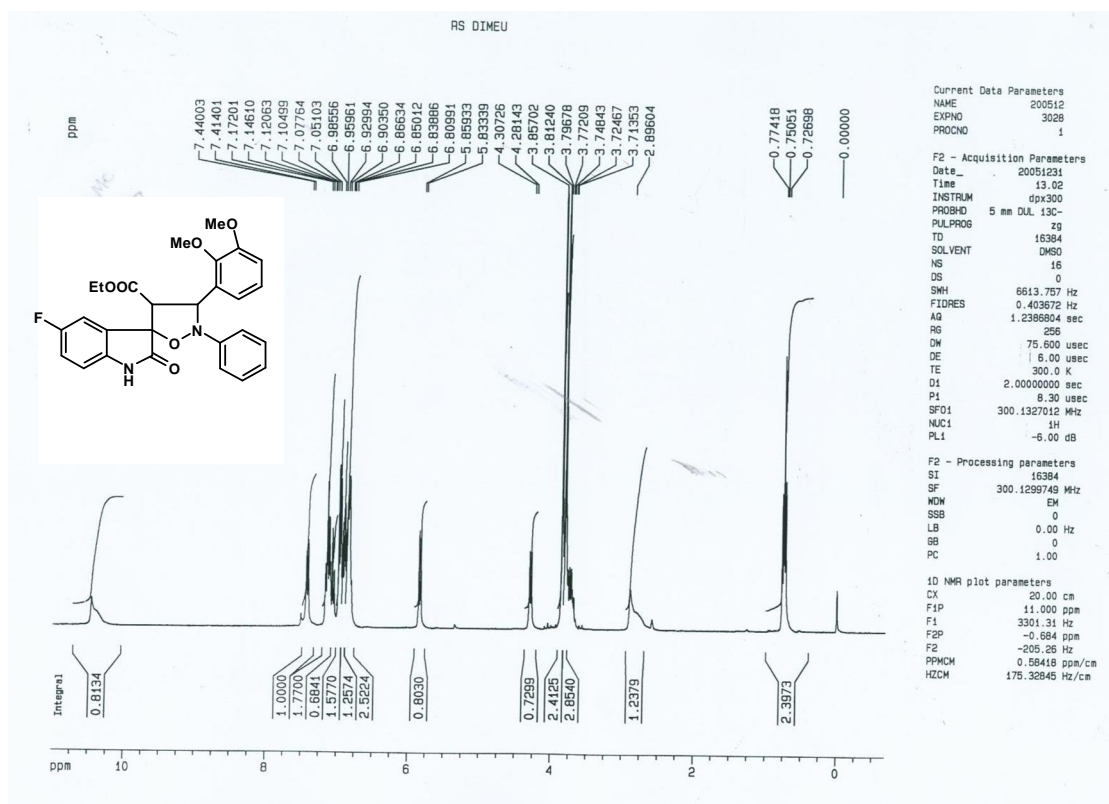

<sup>13</sup>C NMR (Bruker AC-300 Avance, 75.5 MHz, DMSO) of compound 7k

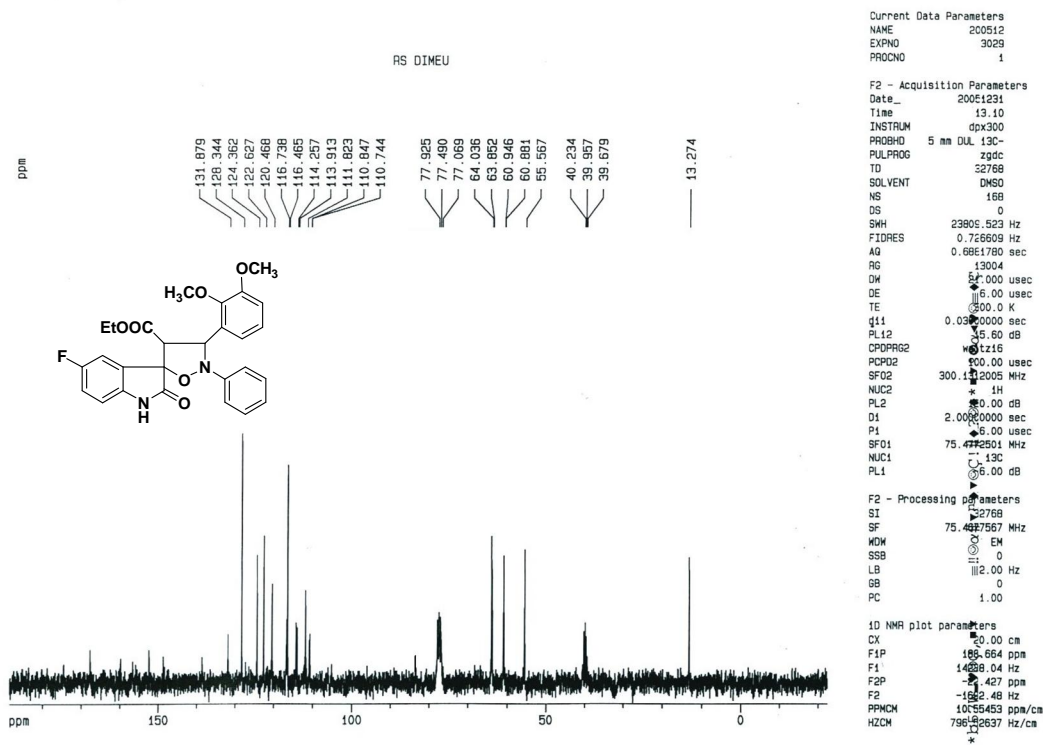

<sup>1</sup>H NMR (Bruker AC-300 Avance, 300 MHz, CDCl<sub>3</sub>) of compound 71

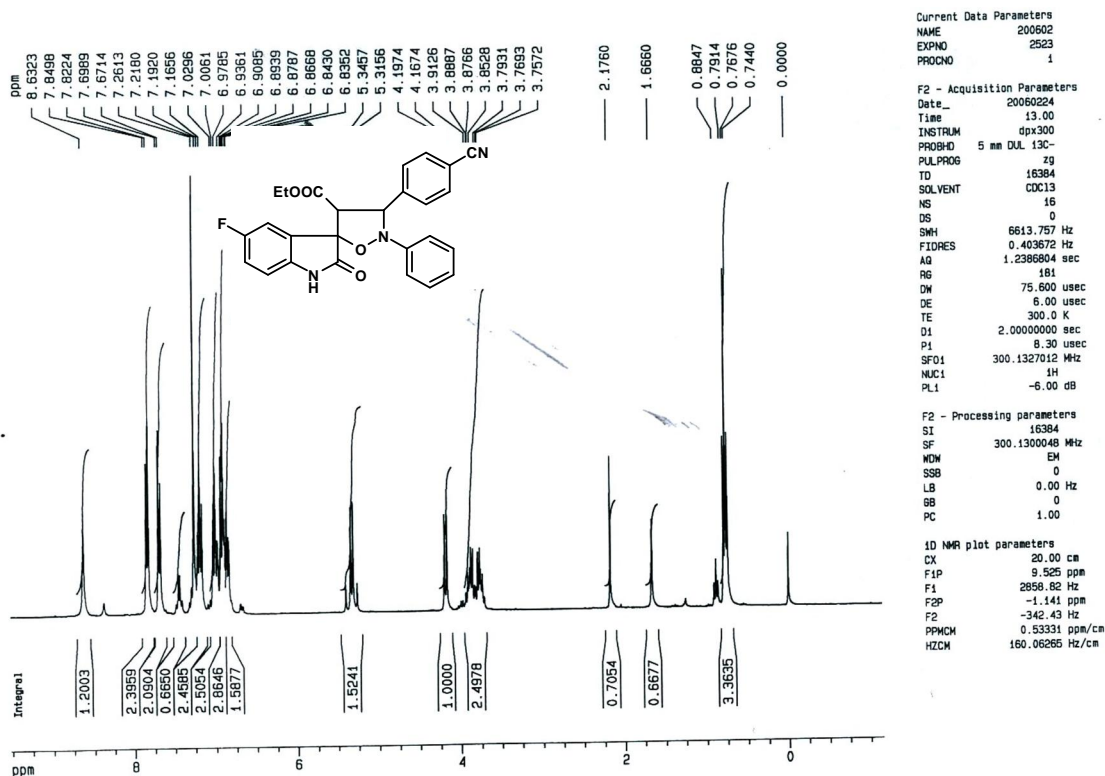

<sup>13</sup>C NMR (Bruker AC-300 Avance, 75.5 MHz, CDCl<sub>3</sub>) of compound 7l

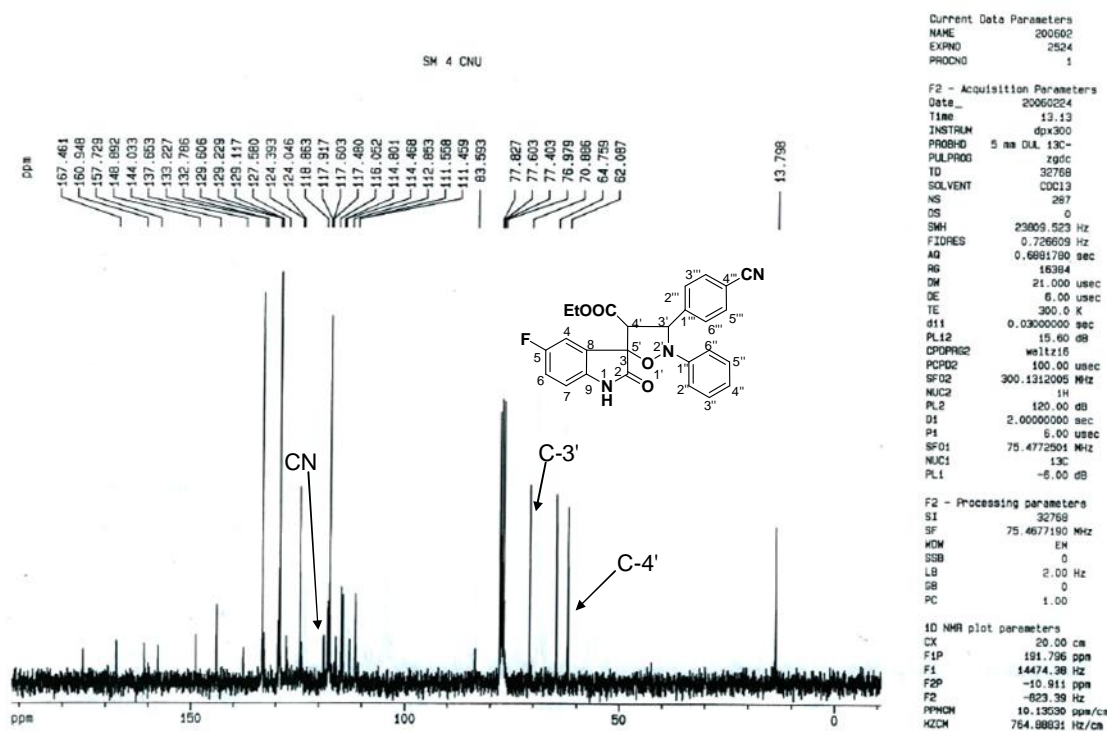



**Part-B**

HPLC purity information of novel final compounds

| <b>Compound</b> | <b>HPLC purity (20%Water / 80% Methanol)</b> | <b>HPLC purity (20%Water / 80% Acetonitrile)</b> |
|-----------------|----------------------------------------------|--------------------------------------------------|
| <b>9k</b>       | <b>100</b>                                   | <b>99.3</b>                                      |
| <b>9l</b>       | <b>99.1</b>                                  | <b>99.6</b>                                      |
| <b>9j</b>       | <b>100</b>                                   | <b>99.4</b>                                      |
| <b>9m</b>       | <b>99.2</b>                                  | <b>98.3</b>                                      |
| <b>9n</b>       | <b>99.4</b>                                  | <b>98.2</b>                                      |
| <b>9i</b>       | <b>99.7</b>                                  | <b>98.7</b>                                      |
| <b>9o</b>       | <b>97.5</b>                                  | <b>98.2</b>                                      |
| <b>9p</b>       | <b>99.3</b>                                  | <b>99.0</b>                                      |
| <b>9q</b>       | <b>99.3</b>                                  | <b>100</b>                                       |
| <b>9c</b>       | <b>99.0</b>                                  | <b>99.2</b>                                      |
| <b>9e</b>       | <b>98.5</b>                                  | <b>99.3</b>                                      |
| <b>9r</b>       | <b>98.8</b>                                  | <b>99.3</b>                                      |
| <b>9a</b>       | <b>99.0</b>                                  | <b>98.7</b>                                      |
| <b>9h</b>       | <b>99.6</b>                                  | <b>100</b>                                       |
| <b>9s</b>       | <b>99.1</b>                                  | <b>99.6</b>                                      |
| <b>7k</b>       | <b>100</b>                                   | <b>99.9</b>                                      |
| <b>7l</b>       | <b>98.1</b>                                  | <b>100</b>                                       |

HPLC purity information of selected known final compounds

| <b>Compound</b> | <b>HPLC purity (20%Water / 80% Methanol)</b> | <b>HPLC purity (20%Water / 80% Acetonitrile)</b> |
|-----------------|----------------------------------------------|--------------------------------------------------|
| <b>10b</b>      | <b>99.4</b>                                  | <b>100</b>                                       |
| <b>10c</b>      | <b>100</b>                                   | <b>99.2</b>                                      |
| <b>10g</b>      | <b>100</b>                                   | <b>99.2</b>                                      |
| <b>10h</b>      | <b>100</b>                                   | <b>99.6</b>                                      |
| <b>8b</b>       | <b>100</b>                                   | <b>98.2</b>                                      |
| <b>8c</b>       | <b>100</b>                                   | <b>98.7</b>                                      |
| <b>8g</b>       | <b>100</b>                                   | <b>99.6</b>                                      |
| <b>8h</b>       | <b>100</b>                                   | <b>98.0</b>                                      |
| <b>8j</b>       | <b>100</b>                                   | <b>99.6</b>                                      |

## HPLC chromatograms of novel final compounds

**Compound 9k: Solvent system: (20%water : 80%methanol)**

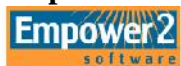

### Default Individual Report

| SAMPLE INFORMATION |                             |                     |                      |
|--------------------|-----------------------------|---------------------|----------------------|
| Sample Name:       | DiOMeL_20water_80methanol_2 | Acquired By:        | System               |
| Sample Type:       | Unknown                     | Sample Set Name:    |                      |
| Vial:              | 1                           | Acq. Method Set:    | 20%water_80%Meth_1ml |
| Injection #:       | 1                           | Processing Method:  | DiOMe_2              |
| Injection Volume:  | 10.00 ul                    | Channel Name:       | 240.0nm              |
| Run Time:          | 20.0 Minutes                | Proc. Chnl. Descr.: | FDA 240.0 nm         |
| Date Acquired:     | 5/3/2008 3:15:38 PM IST     |                     |                      |
| Date Processed:    | 5/3/2008 3:38:54 PM IST     |                     |                      |

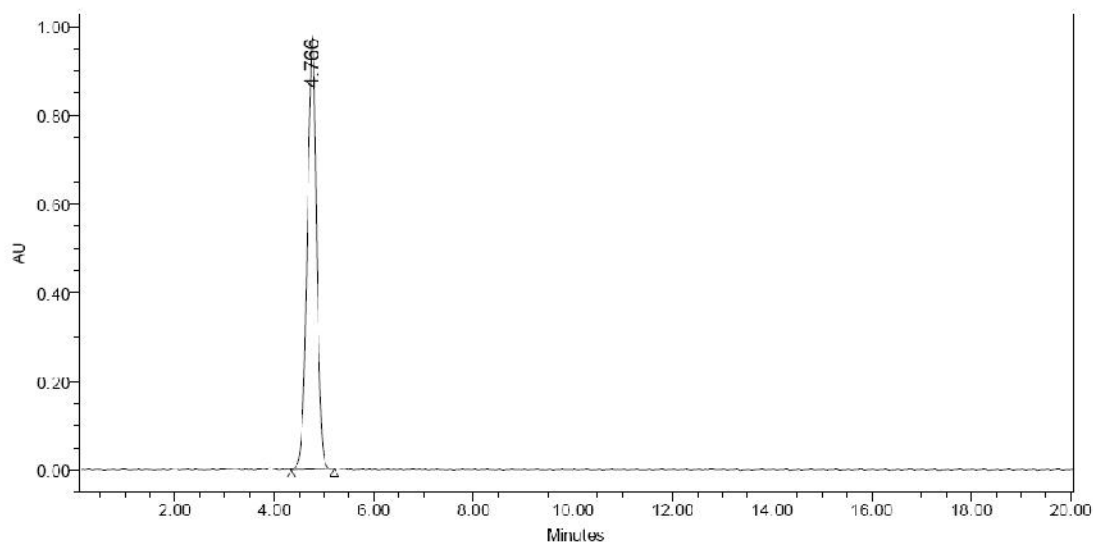

|   | RT    | Area     | % Area | Height |
|---|-------|----------|--------|--------|
| 1 | 4.766 | 13034255 | 100.00 | 979794 |

Reported by User: System  
Report Method: Default Individual Report  
Report Method ID: 1002  
Page: 1 of 1

Project Name: test\_chemistry  
Date Printed: 5/3/2008  
3:39:27 PM Asia/Calcutta

S27

**Compound 9k:**

**Solvent system: (20%water : 80%Acetonitrile)**

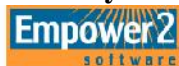

## Default Individual Report

### SAMPLE INFORMATION

|                                         |                        |                     |                     |
|-----------------------------------------|------------------------|---------------------|---------------------|
| Sample Name:                            | DIOMeL_20water_80ACN_1 | Acquired By:        | System              |
| Sample Type:                            | Unknown                | Sample Set Name:    |                     |
| Vial:                                   | 1                      | Acq. Method Set:    | 20_water_80_AcN_1ml |
| Injection #:                            | 6                      | Processing Method:  | DIOMeL_1            |
| Injection Volume:                       | 10.00 ul               | Channel Name:       | 220.0nm             |
| Run Time:                               | 10.0 Minutes           | Proc. Chnl. Descr.: | FDA 220.0 nm        |
| Date Acquired: 5/8/2008 2:24:06 PM IST  |                        |                     |                     |
| Date Processed: 5/8/2008 4:09:10 PM IST |                        |                     |                     |

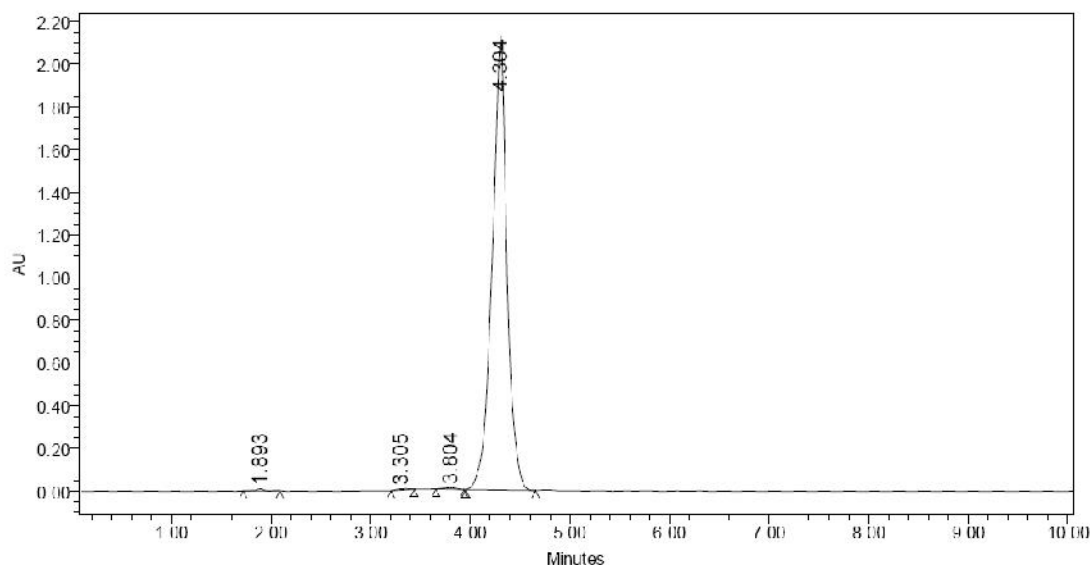

|   | RT    | Area     | % Area | Height  |
|---|-------|----------|--------|---------|
| 1 | 1.893 | 47634    | 0.21   | 8818    |
| 2 | 3.305 | 45465    | 0.20   | 5395    |
| 3 | 3.804 | 62430    | 0.28   | 6860    |
| 4 | 4.304 | 22028856 | 99.30  | 2118627 |

Reported by User: System  
Report Method: Default Individual Report  
Report Method ID: 1002  
Page: 1 of 1

Project Name: test\_chemistry  
Date Printed: 5/8/2008  
4:09:51 PM Asia/Calcutta

**Compound 9l:**

**Solvent system: (20%water : 80%methanol)**

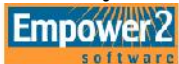

Default Individual Report

SAMPLE INFORMATION

|                   |                           |                     |                      |
|-------------------|---------------------------|---------------------|----------------------|
| Sample Name:      | 4CNL_20water_80methanol_1 | Acquired By:        | System               |
| Sample Type:      | Unknown                   | Sample Set Name:    |                      |
| Vial:             | 1                         | Acq. Method Set:    | 20%water_80%Meth_1ml |
| Injection #:      | 3                         | Processing Method:  | 4CNL_1               |
| Injection Volume: | 10.00 ul                  | Channel Name:       | 235.0nm              |
| Run Time:         | 10.0 Minutes              | Proc. Chnl. Descr.: | FDA 235.0 nm         |
| Date Acquired:    | 5/6/2008 12:28:24 PM IST  |                     |                      |
| Date Processed:   | 5/6/2008 12:48:38 PM IST  |                     |                      |

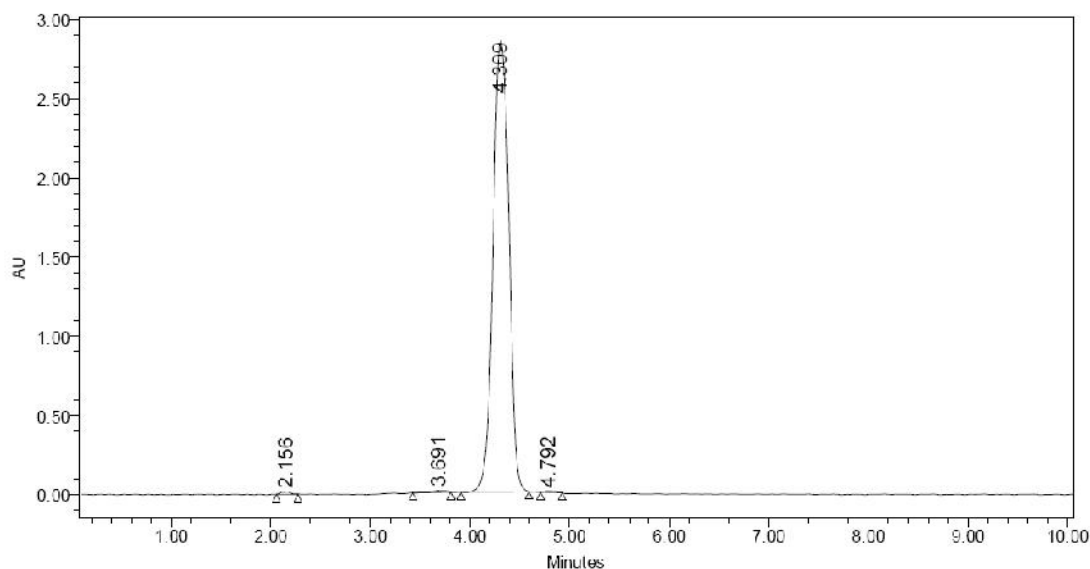

|   | RT    | Area     | % Area | Height  |
|---|-------|----------|--------|---------|
| 1 | 2.156 | 109801   | 0.35   | 16788   |
| 2 | 3.691 | 100748   | 0.32   | 10385   |
| 3 | 4.309 | 31401528 | 99.11  | 2853910 |
| 4 | 4.792 | 72579    | 0.23   | 7862    |

Reported by User: System  
Report Method: Default Individual Report  
Report Method ID: 1002  
Page: 1 of 1

Project Name: test\_chemistry  
Date Printed:  
5/6/2008  
12:49:59 PM Asia/Calcutta

**Compound 9l:**  
**Solvent system: (20%water : 80%Acetonitrile)**

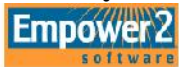

Default Individual Report

| SAMPLE INFORMATION |                         |                     |                     |
|--------------------|-------------------------|---------------------|---------------------|
| Sample Name:       | 4CNL_20water_80ACN_2    | Acquired By:        | System              |
| Sample Type:       | Unknown                 | Sample Set Name:    |                     |
| Vial:              | 1                       | Acq. Method Set:    | 20_water_80_AcN_1ml |
| Injection #:       | 2                       | Processing Method:  | 4CNL_2              |
| Injection Volume:  | 10.00 ul                | Channel Name:       | 240.0nm             |
| Run Time:          | 20.0 Minutes            | Proc. Chnl. Descr.: | PDA 240.0 nm        |
|                    |                         |                     |                     |
| Date Acquired:     | 5/7/2008 1:03:20 PM IST |                     |                     |
| Date Processed:    | 5/7/2008 2:14:42 PM IST |                     |                     |

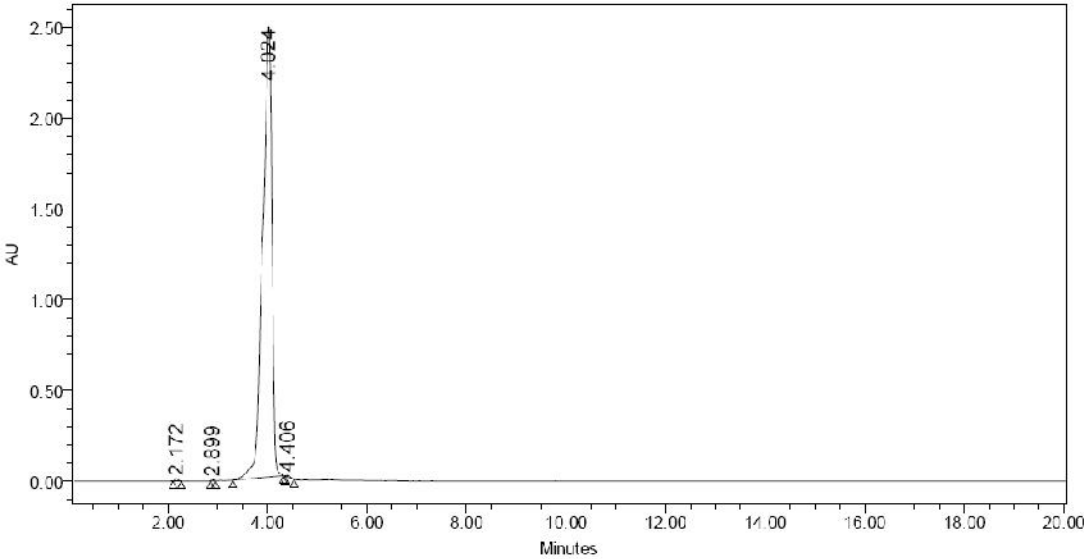

|   | RT    | Area     | % Area | Height  |
|---|-------|----------|--------|---------|
| 1 | 2.172 | 50940    | 0.16   | 13105   |
| 2 | 2.899 | 6748     | 0.02   | 1972    |
| 3 | 4.024 | 31742765 | 99.65  | 2485721 |
| 4 | 4.406 | 52616    | 0.17   | 9779    |

**Compound 9j:**  
**Solvent system: (20%water : 80%methanol)**

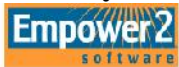

Default Individual Report

| SAMPLE INFORMATION |                          |                     |                      |
|--------------------|--------------------------|---------------------|----------------------|
| Sample Name:       | 3F-20water_80Methanol_1  | Acquired By:        | System               |
| Sample Type:       | Unknown                  | Sample Set Name:    |                      |
| Vial:              | 1                        | Acq. Method Set:    | 20%water_80%Meth_1ml |
| Injection #:       | 1                        | Processing Method:  | 3F_1                 |
| Injection Volume:  | 10.00 ul                 | Channel Name:       | 220.0nm              |
| Run Time:          | 30.0 Minutes             | Proc. Chnl. Descr.: | PDA 220.0 nm         |
|                    |                          |                     |                      |
| Date Acquired:     | 5/2/2008 12:43:34 PM IST |                     |                      |
| Date Processed:    | 5/2/2008 4:10:03 PM IST  |                     |                      |

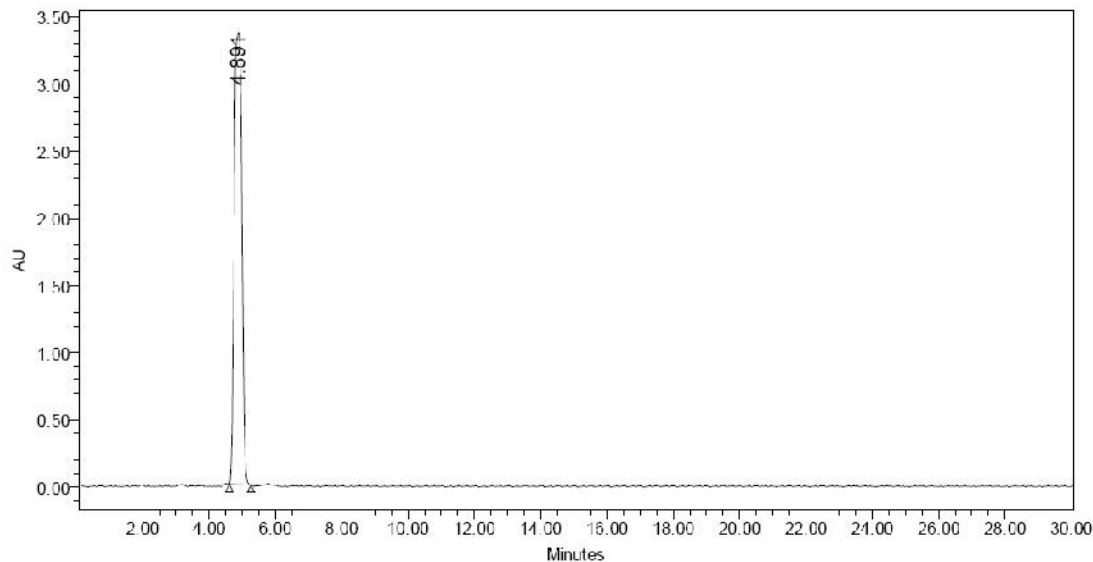

|   | RT    | Area     | % Area | Height  |
|---|-------|----------|--------|---------|
| 1 | 4.891 | 54562286 | 100.00 | 3370468 |

**Compound 9j:**  
**Solvent system: (20%water : 80%Acetonitrile)**

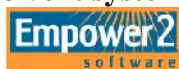

**Default Individual Report**

| SAMPLE INFORMATION |                         |                     |                     |
|--------------------|-------------------------|---------------------|---------------------|
| Sample Name:       | 3F_20water_80ACN_1      | Acquired By:        | System              |
| Sample Type:       | Unknown                 | Sample Set Name:    |                     |
| Vial:              | 1                       | Acq. Method Set:    | 20_water_80_AcN_1ml |
| Injection #:       | 2                       | Processing Method:  | 3F_1_ACN            |
| Injection Volume:  | 10.00 ul                | Channel Name:       | 235.0nm             |
| Run Time:          | 10.0 Minutes            | Proc. Chnl. Descr.: | PDA 235.0 nm        |
| Date Acquired:     | 5/7/2008 3:16:11 PM IST |                     |                     |
| Date Processed:    | 5/7/2008 3:36:02 PM IST |                     |                     |

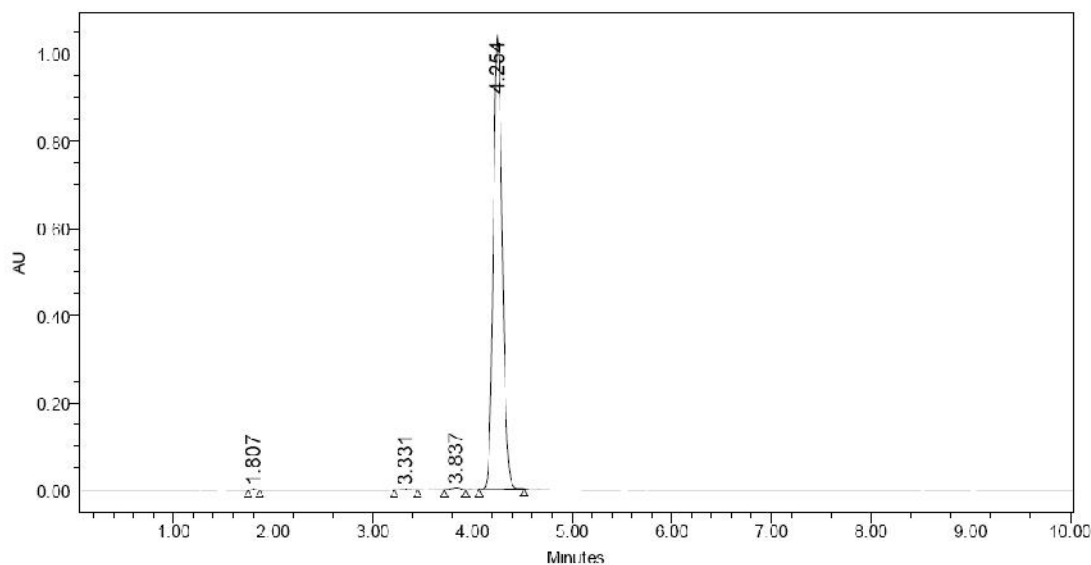

|   | RT    | Area    | % Area | Height  |
|---|-------|---------|--------|---------|
| 1 | 1.807 | 5833    | 0.09   | 1608    |
| 2 | 3.331 | 7231    | 0.11   | 896     |
| 3 | 3.837 | 23733   | 0.36   | 3950    |
| 4 | 4.254 | 6550451 | 99.44  | 1037974 |

Reported by User: System  
Report Method: Default Individual Report  
Report Method ID: 1002  
Page: 1 of 1

Project Name: test\_chemistry  
Date Printed:  
5/7/2008  
3:36:59 PM Asia/Calcutta

**Compound 9m:**

**Solvent system: (20%water : 80%methanol)**

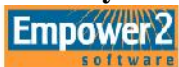

**Default Individual Report**

| SAMPLE INFORMATION |                          |                     |                      |
|--------------------|--------------------------|---------------------|----------------------|
| Sample Name:       | DiF_20water_80methanol_f | Acquired By:        | System               |
| Sample Type:       | Unknown                  | Sample Set Name:    |                      |
| Vial:              | 1                        | Acq. Method Set:    | 20%water_80%Meth_1ml |
| Injection #:       | 2                        | Processing Method:  | DiF_f                |
| Injection Volume:  | 10.00 ul                 | Channel Name:       | 245.0nm              |
| Run Time:          | 10.0 Minutes             | Proc. Chnl. Descr.: | PDA 245.0 nm         |
| Date Acquired:     | 5/6/2008 12:17:03 PM IST |                     |                      |
| Date Processed:    | 5/6/2008 12:41:48 PM IST |                     |                      |

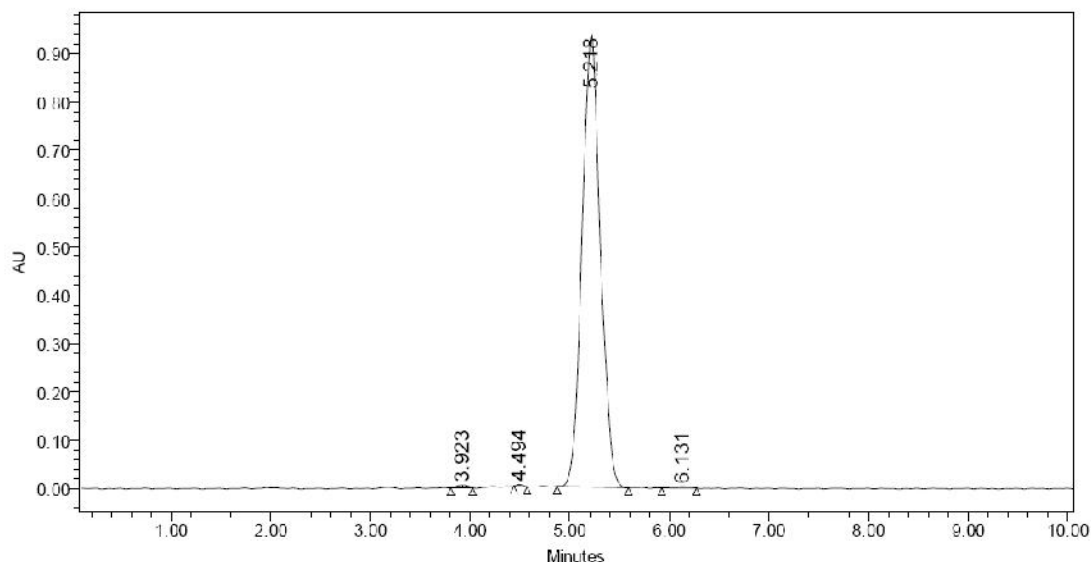

|   | RT    | Area     | % Area | Height |
|---|-------|----------|--------|--------|
| 1 | 3.923 | 41842    | 0.35   | 5147   |
| 2 | 4.494 | 15357    | 0.13   | 3438   |
| 3 | 5.218 | 11955657 | 99.20  | 938043 |
| 4 | 6.131 | 38659    | 0.32   | 3236   |

Reported by User: System  
Report Method: Default Individual Report  
Report Method ID: 1002  
Page: 1 of 1

Project Name: test\_chemistry  
Date Printed: 5/6/2008  
12:42:31 PM Asia/Calcutta



Compound 9m:  
Solvent system: (20%water : 80%Acetonitrile)

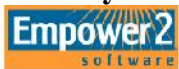

Default Individual Report

| SAMPLE INFORMATION |                         |                     |                     |
|--------------------|-------------------------|---------------------|---------------------|
| Sample Name:       | DF_20water_80ACN_1      | Acquired By:        | System              |
| Sample Type:       | Unknown                 | Sample Set Name:    |                     |
| Vial:              | 1                       | Acq. Method Set:    | 20_water_80_AcN_1ml |
| Injection #:       | 7                       | Processing Method:  | DIF_1               |
| Injection Volume:  | 10.00 ul                | Channel Name:       | 227.0nm@1           |
| Run Time:          | 10.0 Minutes            | Proc. Chnl. Descr.: | PDA 227.0 nm        |
| Date Acquired:     | 5/7/2008 4:55:17 PM IST |                     |                     |
| Date Processed:    | 5/7/2008 5:25:59 PM IST |                     |                     |

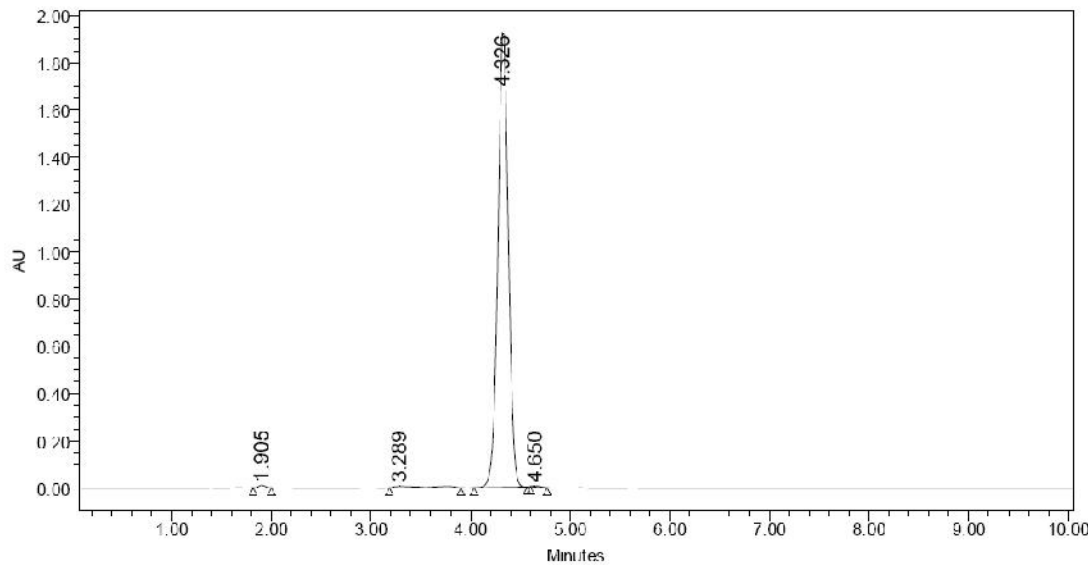

|   | RT    | Area     | % Area | Height  |
|---|-------|----------|--------|---------|
| 1 | 1.905 | 45960    | 0.32   | 10352   |
| 2 | 3.289 | 188681   | 1.18   | 6304    |
| 3 | 4.326 | 14111566 | 98.35  | 1938895 |
| 4 | 4.650 | 21465    | 0.15   | 3838    |

Reported by User: System  
Report Method: Default Individual Report  
Report Method ID: 1002  
Page: 1 of 1

Project Name: test\_chemistry  
Date Printed:  
5/7/2008  
5:26:40 PM Asia/Calcutta

**Compound 9n:**  
**Solvent system: (20%water : 80%methanol)**



Default Individual Report

| SAMPLE INFORMATION |                         |                     |                      |
|--------------------|-------------------------|---------------------|----------------------|
| Sample Name:       | 2F_20water_80methanol_2 | Acquired By:        | System               |
| Sample Type:       | Unknown                 | Sample Set Name:    |                      |
| Vial:              | 1                       | Acq. Method Set:    | 20%water_80%Meth_1ml |
| Injection #:       | 2                       | Processing Method:  | 2F_2                 |
| Injection Volume:  | 10.00 ul                | Channel Name:       | 240.0nm              |
| Run Time:          | 10.0 Minutes            | Proc. Chnl. Descr.: | PDA 240.0 nm         |
|                    |                         |                     |                      |
| Date Acquired:     | 5/6/2008 3:26:51 PM IST |                     |                      |
| Date Processed:    | 5/6/2008 3:50:52 PM IST |                     |                      |

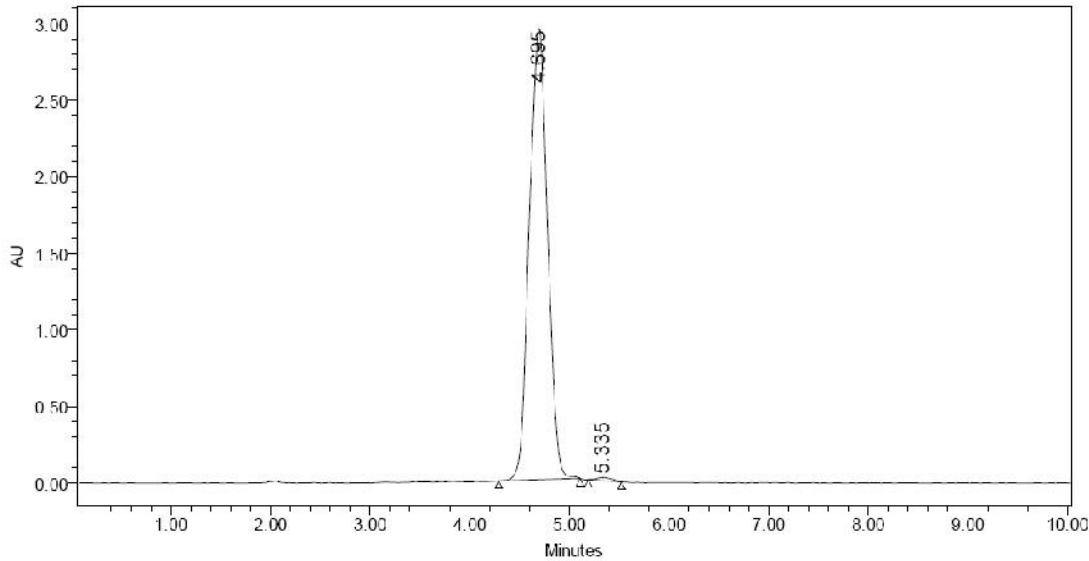

|   | RT    | Area     | % Area | Height  |
|---|-------|----------|--------|---------|
| 1 | 4.695 | 37571391 | 99.41  | 2952545 |
| 2 | 5.335 | 224007   | 0.59   | 21552   |

Reported by User: System  
Report Method: Default Individual Report  
Report Method ID: 1002  
Page: 1 of 1

Project Name: test\_chemistry  
Date Printed: 5/6/2008  
3:51:21 PM Asia/Calcutta

**Compound 9n:**  
**Solvent system: (20%water : 80%Acetonitrile)**

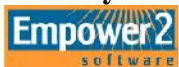

Default Individual Report

| SAMPLE INFORMATION |                         |                     |                     |
|--------------------|-------------------------|---------------------|---------------------|
| Sample Name:       | 2F_20water_80ACN_1      | Acquired By:        | System              |
| Sample Type:       | Unknown                 | Sample Set Name:    |                     |
| Vial:              | 1                       | Acq. Method Set:    | 20_water_80_AcN_1ml |
| Injection #:       | 8                       | Processing Method:  | 2F_1                |
| Injection Volume:  | 10.00 ul                | Channel Name:       | 210.0nm             |
| Run Time:          | 10.0 Minutes            | Proc. Chnl. Descr.: | PDA 210.0 nm        |
| Date Acquired:     | 5/8/2008 3:10:20 PM IST |                     |                     |
| Date Processed:    | 5/8/2008 4:22:01 PM IST |                     |                     |

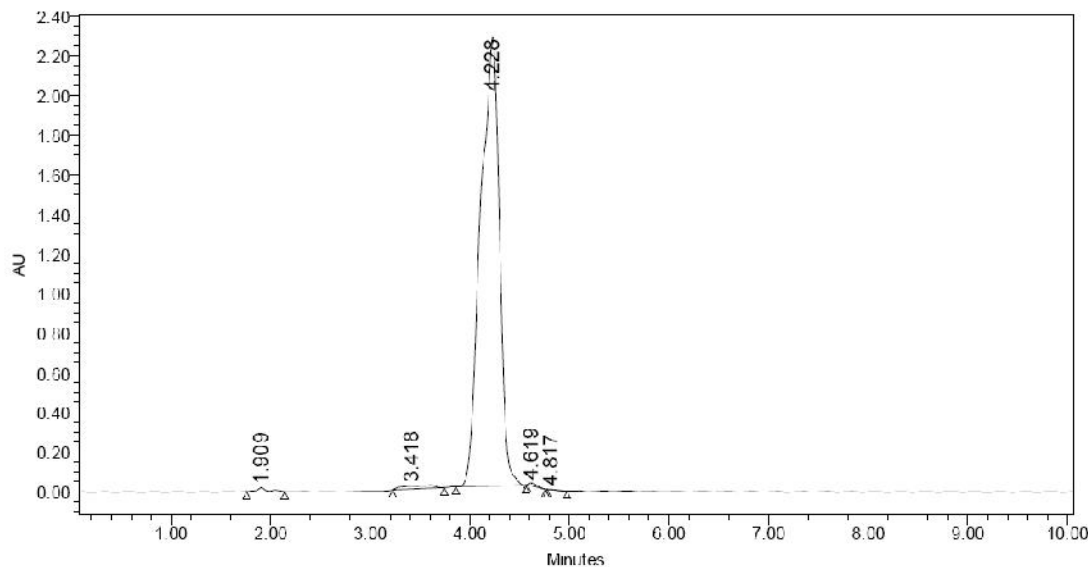

|   | RT    | Area     | % Area | Height  |
|---|-------|----------|--------|---------|
| 1 | 1.909 | 121253   | 0.40   | 18153   |
| 2 | 3.418 | 325595   | 1.07   | 14741   |
| 3 | 4.228 | 29947122 | 98.27  | 2261158 |
| 4 | 4.619 | 69026    | 0.23   | 13474   |
| 5 | 4.817 | 10993    | 0.04   | 1085    |

**Compound 9i:**

**Solvent system: (20%water : 80%methanol)**

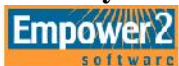

**Default Individual Report**

**SAMPLE INFORMATION**

|                                         |                         |                     |                      |
|-----------------------------------------|-------------------------|---------------------|----------------------|
| Sample Name:                            | 4F_20water_80methanol_1 | Acquired By:        | System               |
| Sample Type:                            | Unknown                 | Sample Set Name:    |                      |
| Vial:                                   | 1                       | Acq. Method Set:    | 20%water_80%Meth_1ml |
| Injection #:                            | 2                       | Processing Method:  | 4F_1                 |
| Injection Volume:                       | 10.00 ul                | Channel Name:       | 250.0nm              |
| Run Time:                               | 15.0 Minutes            | Proc. Chnl. Descr.: | FDA 250.0 nm         |
| Date Acquired: 5/5/2008 2:45:15 PM IST  |                         |                     |                      |
| Date Processed: 5/5/2008 3:06:54 PM IST |                         |                     |                      |

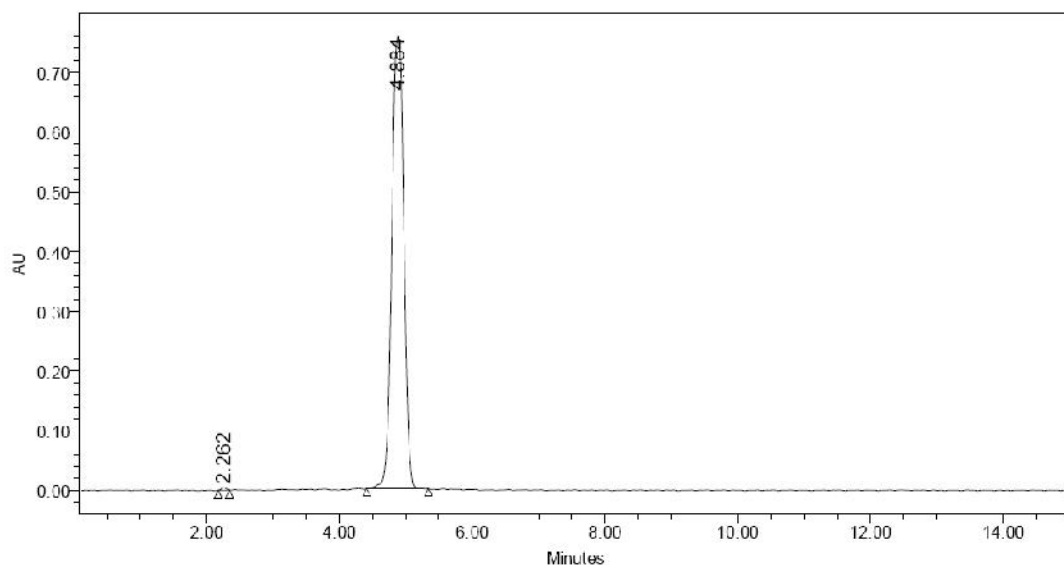

|   | RT    | Area    | % Area | Height |
|---|-------|---------|--------|--------|
| 1 | 2.262 | 23194   | 0.24   | 4877   |
| 2 | 4.884 | 9620647 | 99.76  | 760653 |

Reported by User: System  
Report Method: Default Individual Report  
Report Method ID: 1002  
Page: 1 of 1

Project Name: test\_chemistry  
Date Printed: 5/5/2008  
3:09:58 PM Asia/Calcutta

**Compound 9i:**

**Solvent system: (20%water : 80%Acetonitrile)**

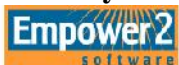

**Default Individual Report**

| SAMPLE INFORMATION |                          |                     |                     |
|--------------------|--------------------------|---------------------|---------------------|
| Sample Name:       | 4F_20water_80ACN_2       | Acquired By:        | System              |
| Sample Type:       | Unknown                  | Sample Set Name:    |                     |
| Vial:              | 1                        | Acq. Method Set:    | 20_water_80_AcN_1ml |
| Injection #:       | 2                        | Processing Method:  | 4F_2                |
| Injection Volume:  | 10.00 ul                 | Channel Name:       | 254.0nm             |
| Run Time:          | 10.0 Minutes             | Proc. Chnl. Descr.: | PDA 254.0 nm        |
| Date Acquired:     | 5/8/2008 12:37:24 PM IST |                     |                     |
| Date Processed:    | 5/8/2008 3:57:29 PM IST  |                     |                     |

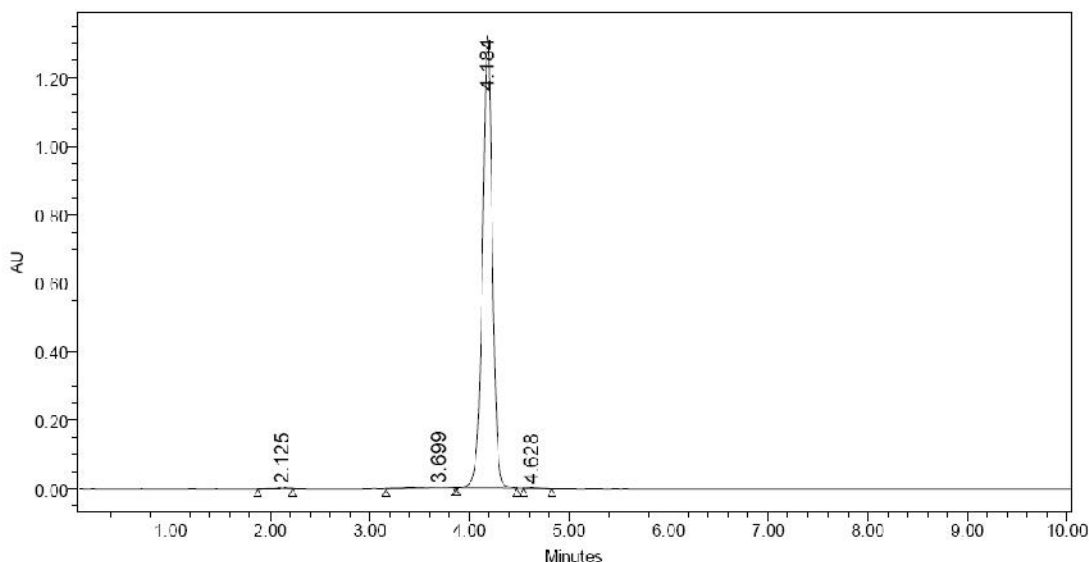

|   | RT    | Area    | % Area | Height  |
|---|-------|---------|--------|---------|
| 1 | 2.125 | 23709   | 0.25   | 4587    |
| 2 | 3.699 | 82561   | 0.88   | 3934    |
| 3 | 4.184 | 9308759 | 98.74  | 1325722 |
| 4 | 4.628 | 12098   | 0.13   | 1639    |

Reported by User: System  
Report Method: Default Individual Report  
Report Method ID: 1002  
Page: 1 of 1

Project Name: test\_chemistry  
Date Printed: 5/8/2008  
3:59:22 PM Asia/Calcutta

**Compound 9o:**  
**Solvent system: (20%water : 80%methanol)**

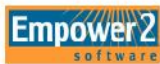

Default Individual Report

| SAMPLE INFORMATION |                         |                     |                      |
|--------------------|-------------------------|---------------------|----------------------|
| Sample Name:       | NMe2_20w ater_80MeOH_1  | Acquired By:        | System               |
| Sample Type:       | Unknown                 | Sample Set Name:    |                      |
| Vial:              | 1                       | Acq. Method Set:    | 20_w ater_80_AcN_1ml |
| Injection #:       | 11                      | Processing Method:  | NMe2_1               |
| Injection Volume:  | 10.00 ul                | Channel Name:       | 257.8nm              |
| Run Time:          | 15.0 Minutes            | Proc. Chnl. Descr.: | PDA 257.8 nm         |
|                    |                         |                     |                      |
| Date Acquired:     | 5/8/2008 3:44:30 PM IST |                     |                      |
| Date Processed:    | 5/8/2008 4:41:03 PM IST |                     |                      |

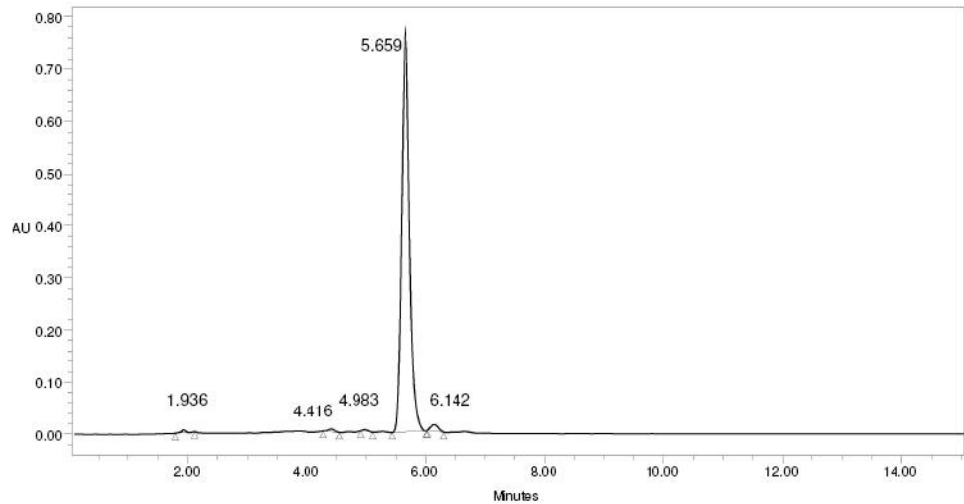

|   | RT    | Area    | % Area | Height |
|---|-------|---------|--------|--------|
| 1 | 1.936 | 27682   | 0.36   | 5136   |
| 2 | 4.416 | 37569   | 0.48   | 5032   |
| 3 | 4.983 | 21075   | 0.27   | 3300   |
| 4 | 5.659 | 7603933 | 97.56  | 776220 |
| 5 | 6.142 | 103164  | 1.32   | 11912  |

**Compound 9o:**  
**Solvent system: (20%water : 80%Acetonitrile)**

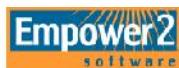

Default Individual Report

SAMPLE INFORMATION

|                   |                         |                     |                     |
|-------------------|-------------------------|---------------------|---------------------|
| Sample Name:      | NMe2_20water_80ACN_1    | Acquired By:        | System              |
| Sample Type:      | Unknown                 | Sample Set Name:    |                     |
| Vial:             | 1                       | Acq. Method Set:    | 20_water_80_AcN_1ml |
| Injection #:      | 10                      | Processing Method:  | NMe2_1              |
| Injection Volume: | 10.00 ul                | Channel Name:       | 230.0nm             |
| Run Time:         | 10.0 Minutes            | Proc. Chnl. Descr.: | FDA 230.0 nm        |
| Date Acquired:    | 5/8/2008 3:32:50 PM IST |                     |                     |
| Date Processed:   | 5/8/2008 4:28:11 PM IST |                     |                     |

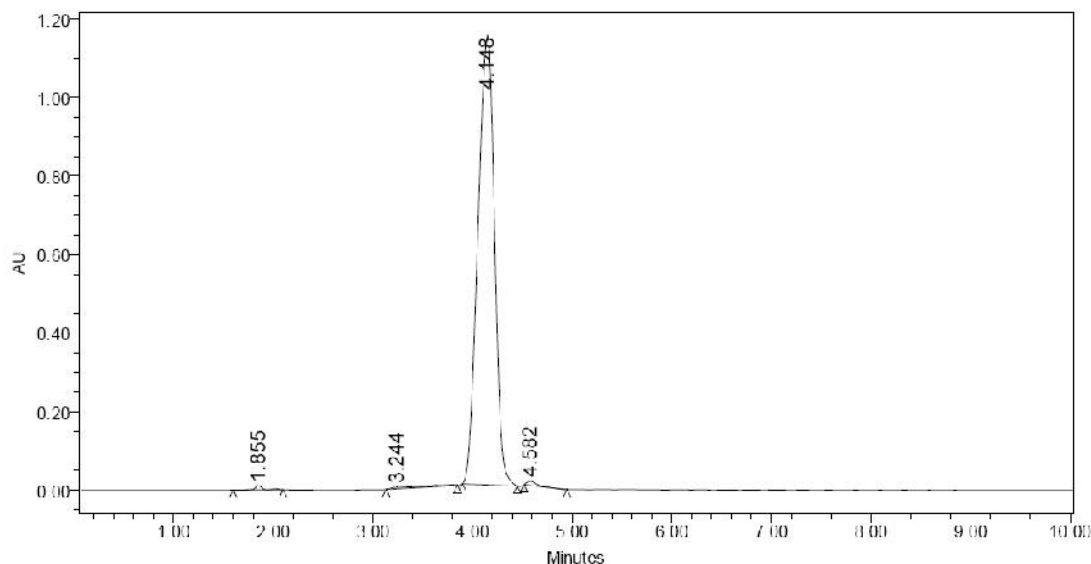

|   | RT    | Area     | % Area | Height  |
|---|-------|----------|--------|---------|
| 1 | 1.855 | 58234    | 0.43   | 11117   |
| 2 | 3.244 | 102567   | 0.76   | 3657    |
| 3 | 4.148 | 13287843 | 96.27  | 1145289 |
| 4 | 4.582 | 72557    | 0.54   | 10781   |

Reported by User: System  
Report Method: Default Individual Report  
Report Method ID: 1002  
Page: 1 of 1

Project Name: test\_chemistry  
Date Printed:  
5/8/2008  
4:28:54 PM Asia/Calcutta

**Compound 9p:**

**Solvent system: (20%water : 80%methanol)**

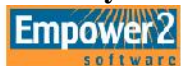

Default Individual Report

| SAMPLE INFORMATION |                           |                     |                      |
|--------------------|---------------------------|---------------------|----------------------|
| Sample Name:       | 4OEt-20water_80Methanol_1 | Acquired By:        | System               |
| Sample Type:       | Unknown                   | Sample Set Name:    |                      |
| Vial:              | 1                         | Acq. Method Set:    | 20%water_80%Meth_1ml |
| Injection #:       | 1                         | Processing Method:  | 4OE_1                |
| Injection Volume:  | 10.00 ul                  | Channel Name:       | 238.0nm              |
| Run Time:          | 10.0 Minutes              | Proc. Chnl. Descr.: | FDA 238.0 nm         |
| Date Acquired:     | 5/2/2008 12:08:31 PM IST  |                     |                      |
| Date Processed:    | 5/2/2008 12:25:42 PM IST  |                     |                      |

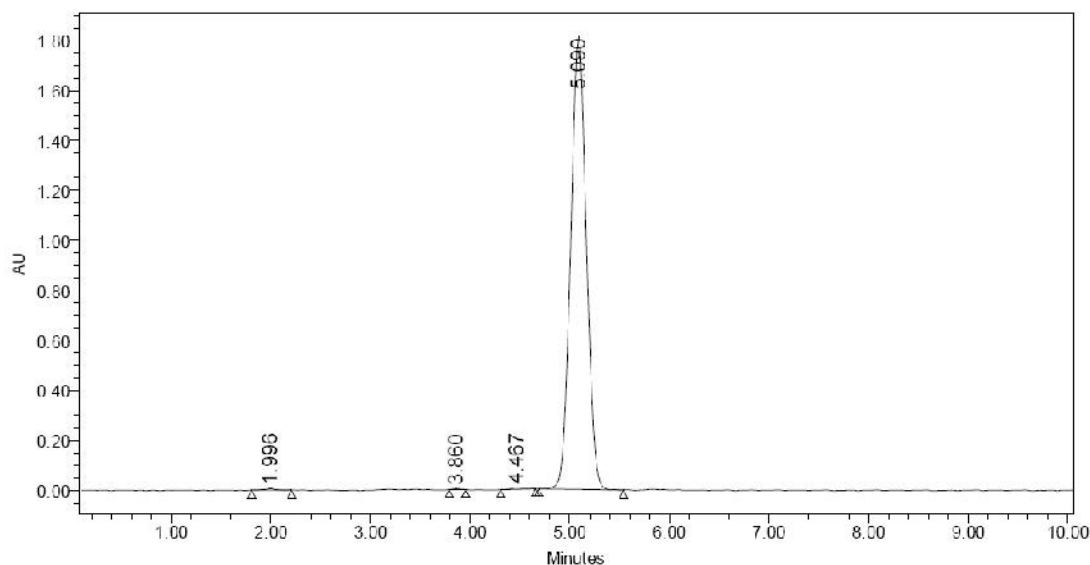

|   | RT    | Area     | % Area | Height  |
|---|-------|----------|--------|---------|
| 1 | 1.996 | 43519    | 0.22   | 6363    |
| 2 | 3.860 | 18297    | 0.09   | 3085    |
| 3 | 4.467 | 66808    | 0.34   | 7071    |
| 4 | 5.090 | 19810893 | 99.35  | 1812011 |

Reported by User: System  
Report Method: Default Individual Report  
Report Method ID: 1002  
Page: 1 of 1

Project Name: test\_chemistry  
Date Printed: 5/2/2008  
12:26:34 PM Asia/Calcutta



**Compound 9p:**

**Solvent system: (20%water : 80%Acetonitrile)**

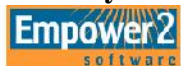

Default Individual Report

| SAMPLE INFORMATION |                         |                     |                     |
|--------------------|-------------------------|---------------------|---------------------|
| Sample Name:       | 4OEt_20water_80ACN_1    | Acquired By:        | System              |
| Sample Type:       | Unknown                 | Sample Set Name:    |                     |
| Vial:              | 1                       | Acq. Method Set:    | 20_water_80_AcN_1ml |
| Injection #:       | 3                       | Processing Method:  | 4OE_1_AcN           |
| Injection Volume:  | 10.00 ul                | Channel Name:       | 240.0nm             |
| Run Time:          | 10.0 Minutes            | Proc. Chnl. Descr.: | FDA 240.0 nm        |
| Date Acquired:     | 5/7/2008 3:27:23 PM IST |                     |                     |
| Date Processed:    | 5/7/2008 5:02:11 PM IST |                     |                     |

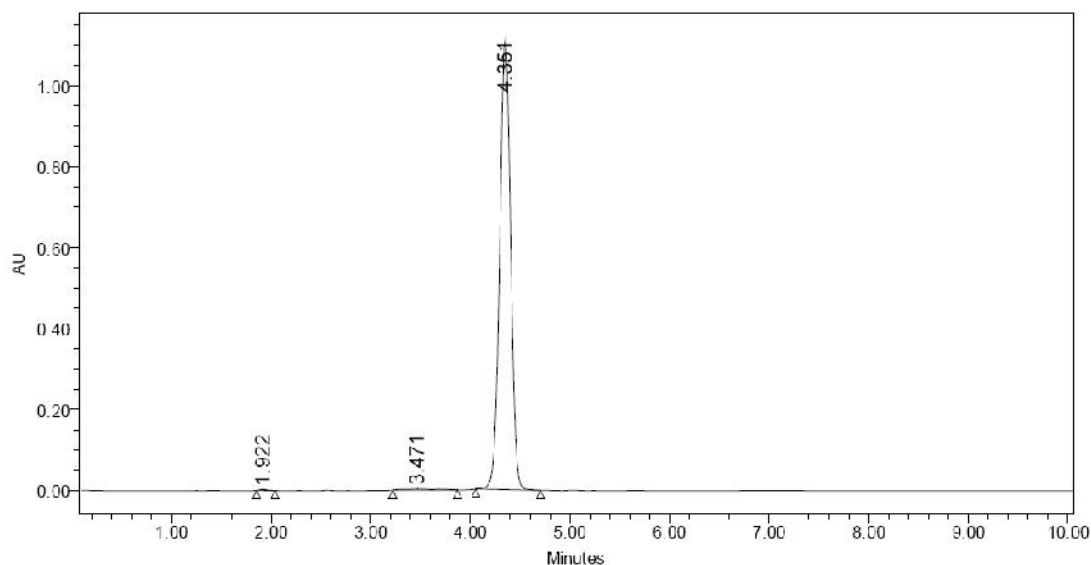

|   | RT    | Area    | % Area | Height  |
|---|-------|---------|--------|---------|
| 1 | 1.922 | 14293   | 0.17   | 2947    |
| 2 | 3.471 | 69106   | 0.80   | 2574    |
| 3 | 4.351 | 8504537 | 99.03  | 1120326 |

Reported by User: System  
Report Method: Default Individual Report  
Report Method ID: 1002  
Page: 1 of 1

Project Name: test\_chemistry  
Date Printed: 5/7/2008  
5:02:54 PM Asia/Calcutta

S42

**Compound 9q:**

**Solvent system: (20%water : 80%methanol)**



Default Individual Report

SAMPLE INFORMATION

|                   |                            |                     |                      |
|-------------------|----------------------------|---------------------|----------------------|
| Sample Name:      | 4-OMe_20water_80methanol_1 | Acquired By:        | System               |
| Sample Type:      | Unknown                    | Sample Set Name:    |                      |
| Vial:             | 1                          | Acq. Method Set:    | 20%water_80%Meth_1ml |
| Injection #:      | 1                          | Processing Method:  | 4OMe_f               |
| Injection Volume: | 10.00 ul                   | Channel Name:       | 254.0nm              |
| Run Time:         | 10.0 Minutes               | Proc. Chnl. Descr.: | FDA 254.0 nm         |
| Date Acquired:    | 5/1/2008 3:35:49 PM IST    |                     |                      |
| Date Processed:   | 5/1/2008 4:44:32 PM IST    |                     |                      |

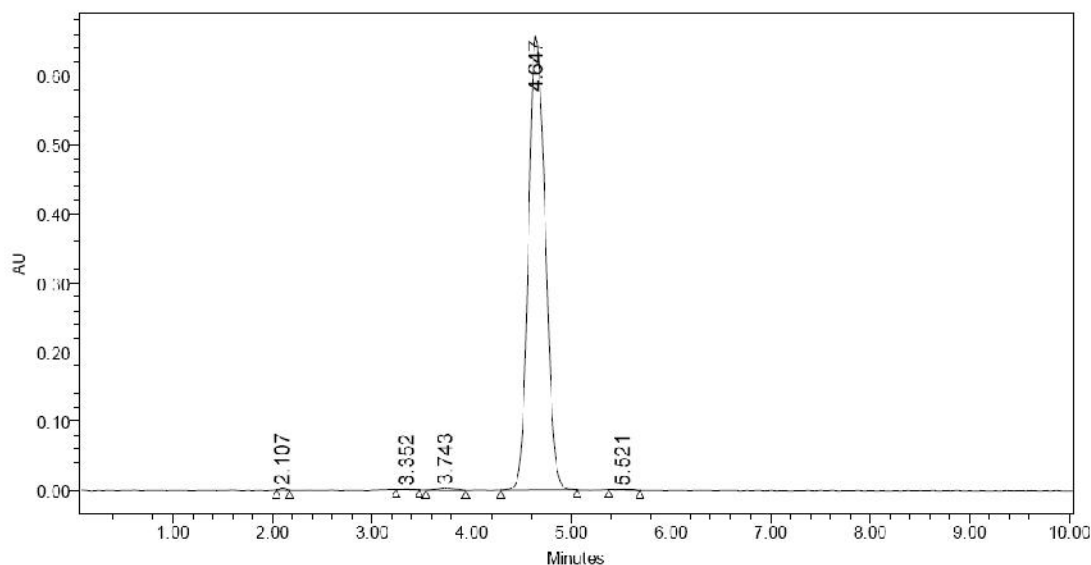

|   | RT    | Area    | % Area | Height |
|---|-------|---------|--------|--------|
| 1 | 2.107 | 10799   | 0.14   | 2610   |
| 2 | 3.352 | 2984    | 0.04   | 413    |
| 3 | 3.743 | 33671   | 0.43   | 2999   |
| 4 | 4.647 | 7767013 | 99.31  | 657923 |
| 5 | 5.521 | 6826    | 0.09   | 684    |

Reported by User: System  
Report Method: Default Individual Report  
Report Method ID: 1002  
Page: 1 of 1

Project Name: test\_chemistry  
Date Printed: 5/1/2008  
4:46:09 PM Asia/Calcutta

**Compound 9q:**

**Solvent system: (20%water : 80%Acetonitrile)**



Default Individual Report

SAMPLE INFORMATION

|                   |                         |                     |                     |
|-------------------|-------------------------|---------------------|---------------------|
| Sample Name:      | 4OMe_20water_80ACN_1    | Acquired By:        | System              |
| Sample Type:      | Unknown                 | Sample Set Name:    |                     |
| Vial:             | 1                       | Acq. Method Set:    | 20_water_80_AcN_1ml |
| Injection #:      | 5                       | Processing Method:  | 4OMe_1              |
| Injection Volume: | 10.00 ul                | Channel Name:       | 232.0nm             |
| Run Time:         | 10.0 Minutes            | Proc. Chnl. Descr.: | FDA 232.0 nm        |
| Date Acquired:    | 5/7/2008 4:32:32 PM IST |                     |                     |
| Date Processed:   | 5/7/2008 5:18:53 PM IST |                     |                     |

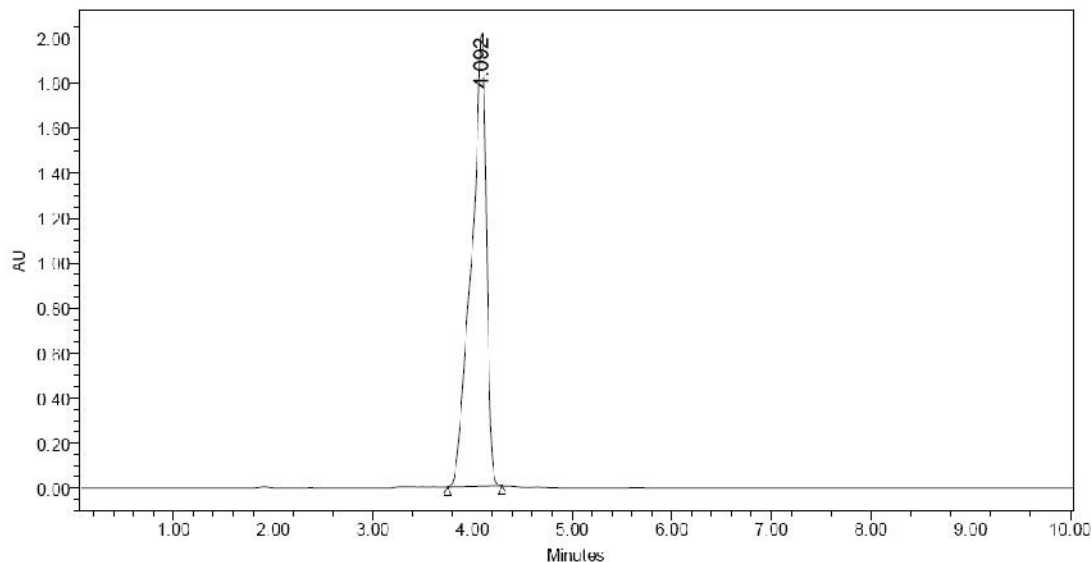

|   | RT    | Area     | % Area | Height  |
|---|-------|----------|--------|---------|
| 1 | 4.092 | 21113857 | 100.00 | 2031703 |

Reported by User: System  
Report Method: Default Individual Report  
Report Method ID: 1002  
Page: 1 of 1

Project Name: test\_chemistry  
Date Printed:  
5/7/2008  
5:19:33 PM Asia/Calcutta

S44

**Compound 9c:**

**Solvent system: (20%water : 80%methanol)**

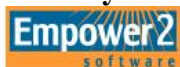

**Default Individual Report**

| SAMPLE INFORMATION |                          |                     |                      |
|--------------------|--------------------------|---------------------|----------------------|
| Sample Name:       | 4Br_20water_80methanol_2 | Acquired By:        | System               |
| Sample Type:       | Unknown                  | Sample Set Name:    |                      |
| Vial:              | 1                        | Acq. Method Set:    | 20%water_80%Meth_1ml |
| Injection #:       | 2                        | Processing Method:  | 4Br_2                |
| Injection Volume:  | 10.00 ul                 | Channel Name:       | 228.0nm              |
| Run Time:          | 10.0 Minutes             | Proc. Chnl. Descr.: | PDA 228.0 nm         |
| Date Acquired:     | 5/1/2008 6:01:22 PM IST  |                     |                      |
| Date Processed:    | 5/1/2008 7:41:21 PM IST  |                     |                      |

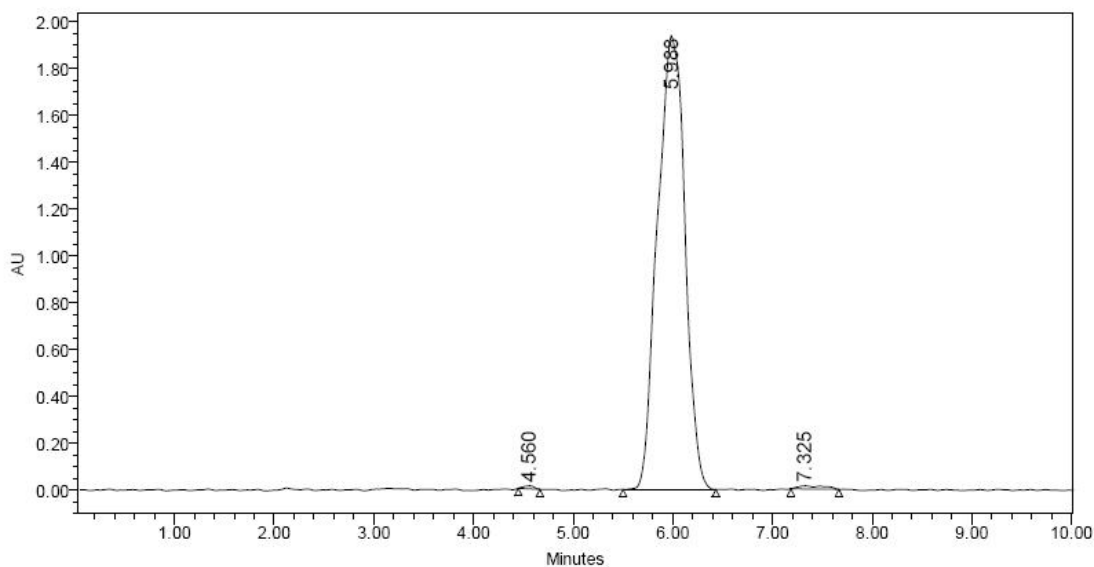

|   | RT    | Area     | % Area | Height  |
|---|-------|----------|--------|---------|
| 1 | 4.560 | 94843    | 0.25   | 12612   |
| 2 | 5.988 | 37107059 | 99.06  | 1940395 |
| 3 | 7.325 | 256079   | 0.68   | 13101   |

Reported by User: System  
Report Method: Default Individual Report  
Report Method ID: 1002  
Page: 1 of 1

Project Name: test\_chemistry  
Date Printed: 5/1/2008  
7:42:08 PM Asia/Calcutta

**Compound 9c:**  
**Solvent system: (20%water : 80%Acetonitrile)**



Default Individual Report

| SAMPLE INFORMATION |                         |                     |                     |
|--------------------|-------------------------|---------------------|---------------------|
| Sample Name:       | 4Br_20water_80ACN_1     | Acquired By:        | System              |
| Sample Type:       | Unknown                 | Sample Set Name:    |                     |
| Vial:              | 1                       | Acq. Method Set:    | 20_water_80_AcN_1ml |
| Injection #:       | 6                       | Processing Method:  | 4Br_1               |
| Injection Volume:  | 10.00 ul                | Channel Name:       | 235.0nm             |
| Run Time:          | 10.0 Minutes            | Proc. Chnl. Descr.: | PDA 235.0 nm        |
|                    |                         |                     |                     |
| Date Acquired:     | 5/7/2008 4:44:31 PM IST |                     |                     |
| Date Processed:    | 5/7/2008 5:23:22 PM IST |                     |                     |

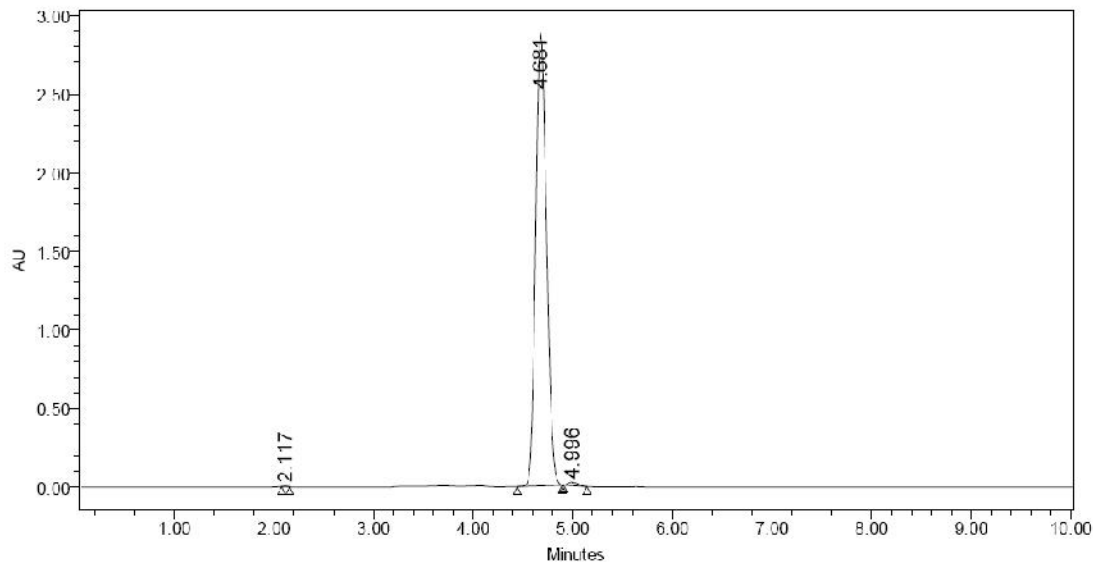

|   | RT    | Area     | % Area | Height  |
|---|-------|----------|--------|---------|
| 1 | 2.117 | 11225    | 0.05   | 3657    |
| 2 | 4.681 | 21853348 | 99.28  | 2887672 |
| 3 | 4.996 | 147390   | 0.67   | 21891   |

Reported by User: System  
Report Method: Default Individual Report  
Report Method ID: 1002  
Page: 1 of 1

Project Name: test\_chemistry  
Date Printed: 5/7/2008  
5:23:57 PM Asia/Calcutta

**Compound 9e:**

**Solvent system: (20%water : 80%methanol)**

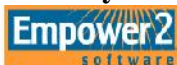

**Default Individual Report**

| SAMPLE INFORMATION |                           |                     |                      |
|--------------------|---------------------------|---------------------|----------------------|
| Sample Name:       | 4NO2_20water_80methanol_1 | Acquired By:        | System               |
| Sample Type:       | Unknown                   | Sample Set Name:    |                      |
| Vial:              | 1                         | Acq. Method Set:    | 20%water_80%Meth_1ml |
| Injection #:       | 2                         | Processing Method:  | 4NO2_1               |
| Injection Volume:  | 10.00 ul                  | Channel Name:       | 230.0nm              |
| Run Time:          | 20.0 Minutes              | Proc. Chnl. Descr.: | PDA 230.0 nm         |
| Date Acquired:     | 5/2/2008 7:04:20 PM IST   |                     |                      |
| Date Processed:    | 5/2/2008 7:43:05 PM IST   |                     |                      |

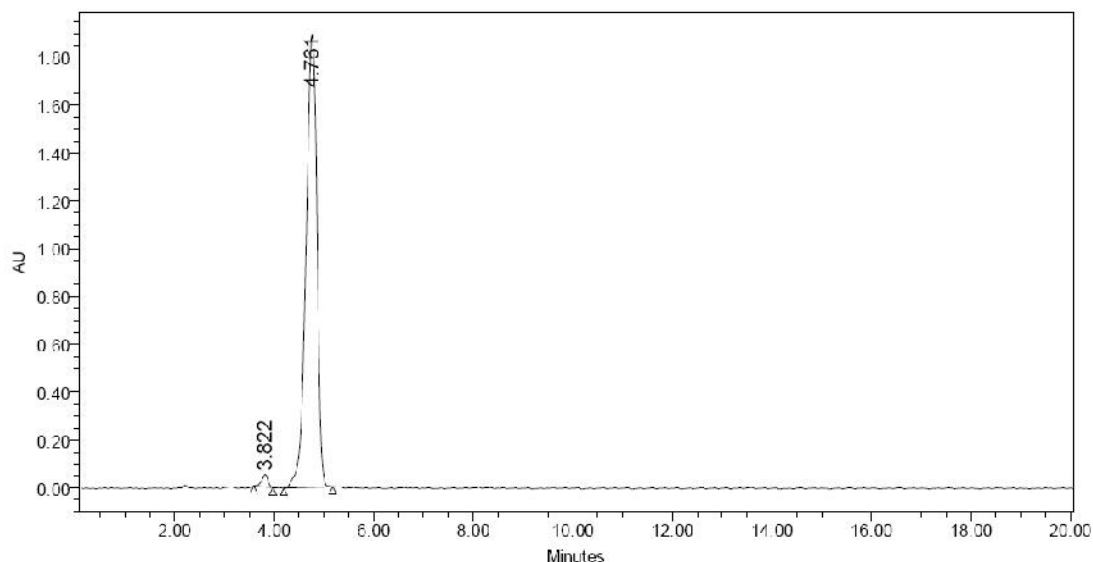

|   | RT    | Area     | % Area | Height  |
|---|-------|----------|--------|---------|
| 1 | 3.822 | 443604   | 1.50   | 52427   |
| 2 | 4.761 | 29181366 | 98.50  | 1893972 |

Reported by User: System  
Report Method: Default Individual Report  
Report Method ID: 1002  
Page: 1 of 1

Project Name: test\_chemistry  
Date Printed: 5/2/2008  
7:43:54 PM Asia/Calcutta

**Compound 9e:**  
**Solvent system: (20%water : 80%Acetonitrile)**



Default Individual Report

| SAMPLE INFORMATION |                         |                     |                     |
|--------------------|-------------------------|---------------------|---------------------|
| Sample Name:       | 4NO2_20water_80ACN_1    | Acquired By:        | System              |
| Sample Type:       | Unknown                 | Sample Set Name:    |                     |
| Vial:              | 1                       | Acq. Method Set:    | 20_water_80_AcN_1ml |
| Injection #:       | 4                       | Processing Method:  | 4NO2_1              |
| Injection Volume:  | 10.00 ul                | Channel Name:       | 215.0nm             |
| Run Time:          | 20.0 Minutes            | Proc. Chnl. Descr.: | PDA 215.0 nm        |
| Date Acquired:     | 5/8/2008 1:04:19 PM IST |                     |                     |
| Date Processed:    | 5/8/2008 4:06:28 PM IST |                     |                     |

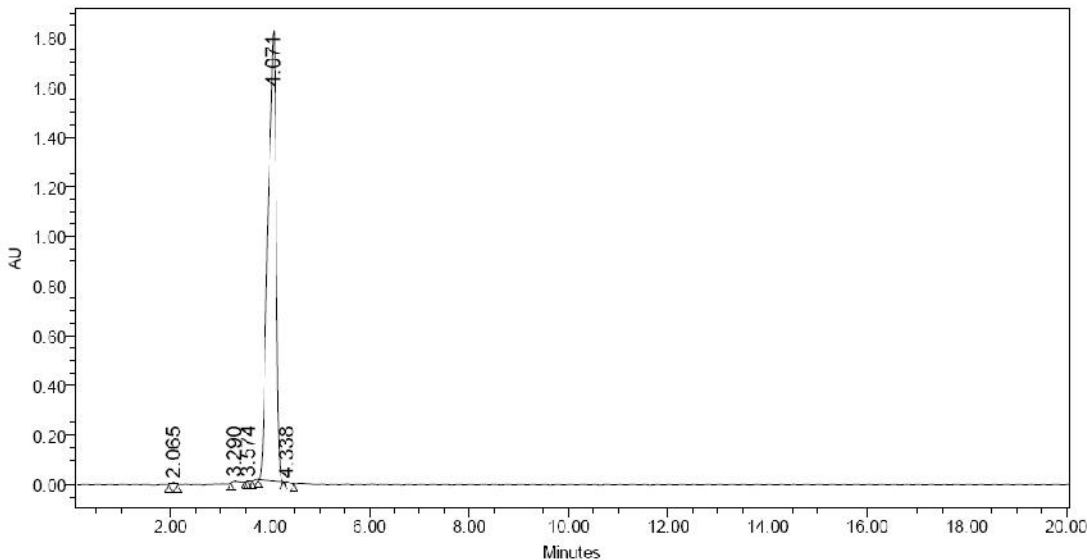

|   | RT    | Area     | % Area | Height  |
|---|-------|----------|--------|---------|
| 1 | 2.065 | 43735    | 0.21   | 11071   |
| 2 | 3.290 | 58837    | 0.29   | 6979    |
| 3 | 3.574 | 2383     | 0.01   | 723     |
| 4 | 4.071 | 20246426 | 99.36  | 1829056 |
| 5 | 4.338 | 24544    | 0.12   | 3996    |

Reported by User: System  
Report Method: Default Individual Report  
Report Method ID: 1002  
Page: 1 of 1

Project Name: test\_chemistry  
Date Printed: 5/8/2008  
4:07:02 PM Asia/Calcutta

**Compound 9r:**  
**Solvent system: (20%water : 80%methanol)**



Default Individual Report

| SAMPLE INFORMATION |                             |                     |                      |
|--------------------|-----------------------------|---------------------|----------------------|
| Sample Name:       | TriOme_20water_80methanol_2 | Acquired By:        | System               |
| Sample Type:       | Unknown                     | Sample Set Name:    |                      |
| Vial:              | 1                           | Acq. Method Set:    | 20%water_80%Meth_1ml |
| Injection #:       | 2                           | Processing Method:  | TriOme4              |
| Injection Volume:  | 10.00 ul                    | Channel Name:       | 250.0nm              |
| Run Time:          | 10.0 Minutes                | Proc. Chnl. Descr.: | PDA 250.0 nm         |
| Date Acquired:     | 5/1/2008 12:53:31 PM IST    |                     |                      |
| Date Processed:    | 5/1/2008 1:14:50 PM IST     |                     |                      |

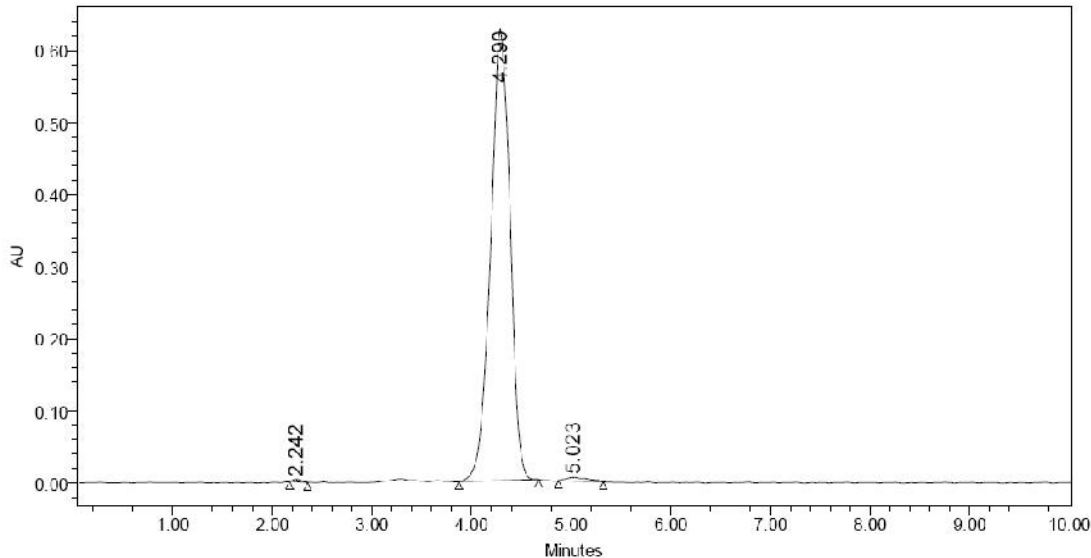

|   | RT    | Area    | % Area | Height |
|---|-------|---------|--------|--------|
| 1 | 2.242 | 20610   | 0.24   | 3450   |
| 2 | 4.290 | 8511300 | 98.87  | 626794 |
| 3 | 5.023 | 76728   | 0.89   | 5039   |

Reported by User: System  
Report Method: Default Individual Report  
Report Method ID: 1002  
Page: 1 of 1

Project Name: test\_chemistry  
Date Printed: 5/1/2008  
1:20:47 PM Asia/Calcutta



**Compound 9r:**

**Solvent system: (20%water : 80%Acetonitrile)**

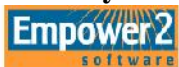

**Default Individual Report**

| SAMPLE INFORMATION |                         |                     |                     |
|--------------------|-------------------------|---------------------|---------------------|
| Sample Name:       | TriOMe_20water_80ACN_1  | Acquired By:        | System              |
| Sample Type:       | Unknown                 | Sample Set Name:    |                     |
| Vial:              | 1                       | Acq. Method Set:    | 20_water_80_AcN_1ml |
| Injection #:       | 3                       | Processing Method:  | TriOMe_1            |
| Injection Volume:  | 10.00 ul                | Channel Name:       | 265.0nm             |
| Run Time:          | 10.0 Minutes            | Proc. Chnl. Descr.: | PDA 265.0 nm        |
| Date Acquired:     | 5/7/2008 4:09:40 PM IST |                     |                     |
| Date Processed:    | 5/7/2008 5:12:33 PM IST |                     |                     |

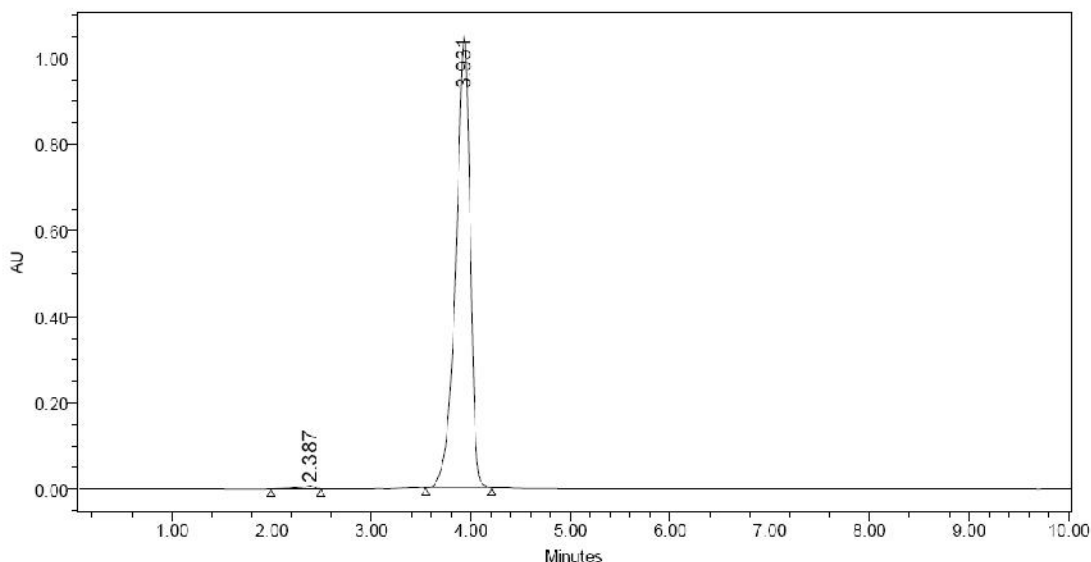

|   | RT    | Area     | % Area | Height  |
|---|-------|----------|--------|---------|
| 1 | 2.387 | 69068    | 0.65   | 7248    |
| 2 | 3.931 | 10537917 | 99.35  | 1051752 |

Reported by User: System  
Report Method: Default Individual Report  
Report Method ID: 1002  
Page: 1 of 1

Project Name: test\_chemistry  
Date Printed: 5/7/2008  
5:13:14 PM Asia/Calcutta

**Compound 9a:**  
**Solvent system: (20%water : 80%methanol)**



Default Individual Report

| SAMPLE INFORMATION |                          |                     |                      |
|--------------------|--------------------------|---------------------|----------------------|
| Sample Name:       | 4Cl_20water_80methanol_1 | Acquired By:        | System               |
| Sample Type:       | Unknown                  | Sample Set Name:    |                      |
| Vial:              | 1                        | Acq. Method Set:    | 20%water_80%Meth_1ml |
| Injection #:       | 2                        | Processing Method:  | 4Cl_1                |
| Injection Volume:  | 10.00 ul                 | Channel Name:       | 240.0nm              |
| Run Time:          | 20.0 Minutes             | Proc. Chnl. Descr.: | PDA 240.0 nm         |
| Date Acquired:     | 5/3/2008 3:36:16 PM IST  |                     |                      |
| Date Processed:    | 5/3/2008 4:02:38 PM IST  |                     |                      |

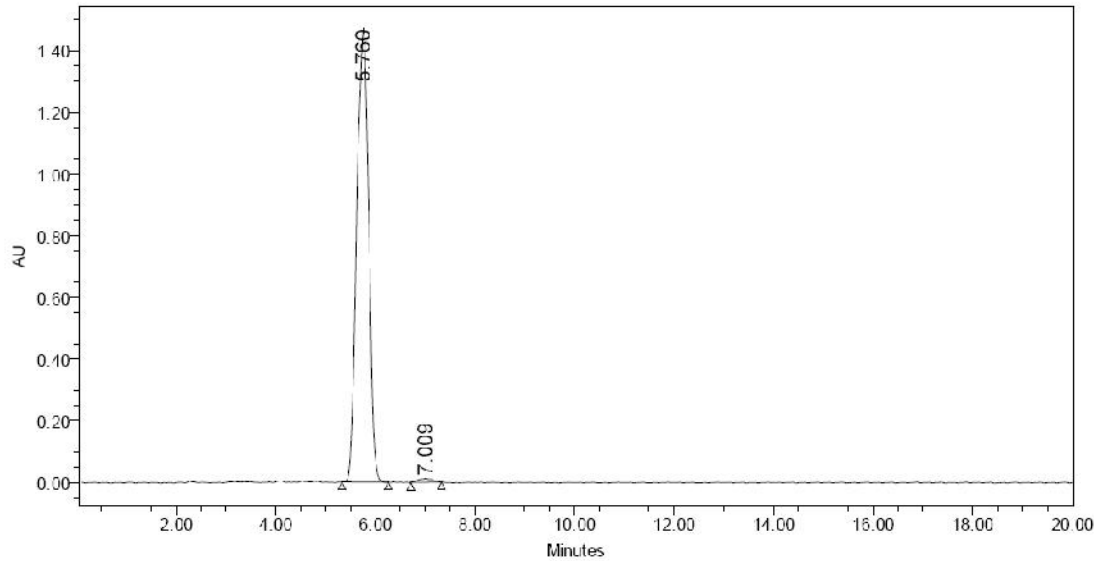

|   | RT    | Area     | % Area | Height  |
|---|-------|----------|--------|---------|
| 1 | 5.760 | 24389264 | 99.02  | 1469362 |
| 2 | 7.009 | 242335   | 0.98   | 12306   |

Reported by User: System  
Report Method: Default Individual Report  
Report Method ID: 1002  
Page: 1 of 1

Project Name: test\_chemistry  
Date Printed: 5/3/2008  
4:03:19 PM Asia/Calcutta

**Compound 9a:**

**Solvent system: (20%water : 80%Acetonitrile)**



**Default Individual Report**

| SAMPLE INFORMATION |                         |                     |                     |
|--------------------|-------------------------|---------------------|---------------------|
| Sample Name:       | 4Cl_20water_80ACN_1     | Acquired By:        | System              |
| Sample Type:       | Unknown                 | Sample Set Name:    |                     |
| Vial:              | 1                       | Acq. Method Set:    | 20_water_80_AcN_1ml |
| Injection #:       | 7                       | Processing Method:  | 4Cl_1               |
| Injection Volume:  | 10.00 ul                | Channel Name:       | 270.0nm             |
| Run Time:          | 10.0 Minutes            | Proc. Chnl. Descr.: | PDA 270.0 nm        |
| Date Acquired:     | 5/8/2008 2:36:30 PM IST |                     |                     |
| Date Processed:    | 5/8/2008 4:15:58 PM IST |                     |                     |

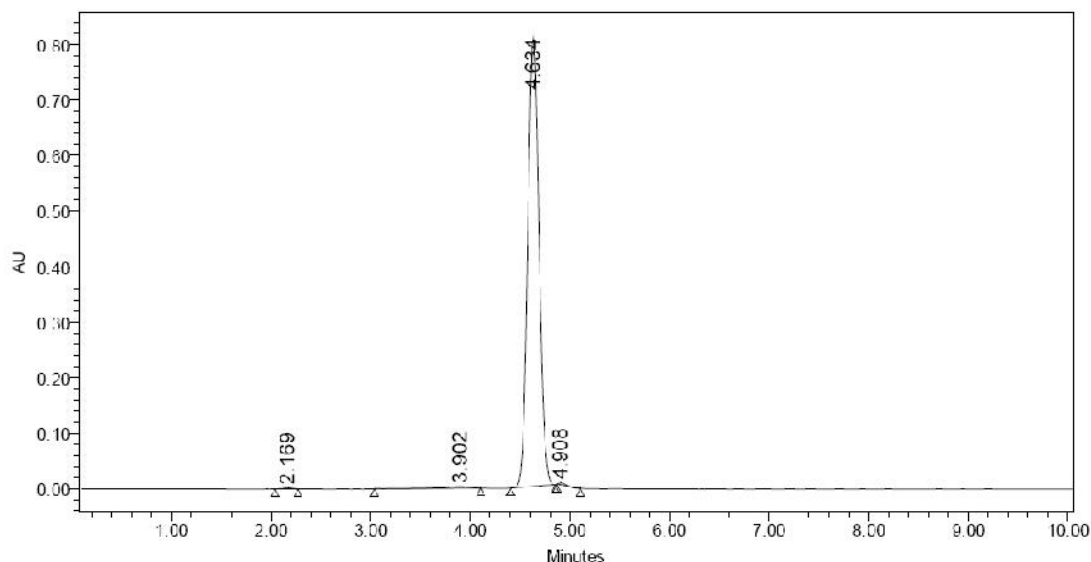

|   | RT    | Area    | % Area | Height |
|---|-------|---------|--------|--------|
| 1 | 2.169 | 12750   | 0.20   | 2341   |
| 2 | 3.902 | 53011   | 0.82   | 3314   |
| 3 | 4.634 | 6408207 | 98.71  | 814740 |
| 4 | 4.908 | 17768   | 0.27   | 2969   |

Reported by User: System  
Report Method: Default Individual Report  
Report Method ID: 1002  
Page: 1 of 1

Project Name: test\_chemistry  
Date Printed: 5/8/2008  
4:16:34 PM Asia/Calcutta

**Compound 9h:**

**Solvent system: (20%water : 80%methanol)**



**Default Individual Report**

**SAMPLE INFORMATION**

|                   |                          |                     |                      |
|-------------------|--------------------------|---------------------|----------------------|
| Sample Name:      | 3Me_20water_80methanol_2 | Acquired By:        | System               |
| Sample Type:      | Unknown                  | Sample Set Name:    |                      |
| Vial:             | 1                        | Acq. Method Set:    | 20%water_80%Meth_1ml |
| Injection #:      | 2                        | Processing Method:  | 3Me_4                |
| Injection Volume: | 10.00 ul                 | Channel Name:       | 240.0nm              |
| Run Time:         | 10.0 Minutes             | Proc. Chnl. Descr.: | FDA 240.0 nm         |
| Date Acquired:    | 5/1/2008 5:12:35 PM IST  |                     |                      |
| Date Processed:   | 5/1/2008 5:30:39 PM IST  |                     |                      |

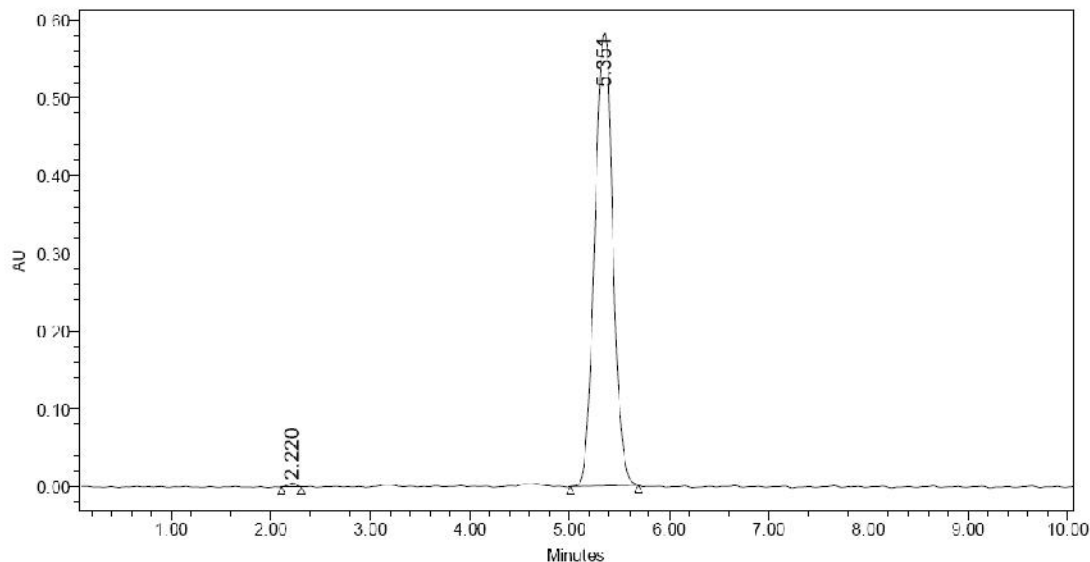

|   | RT    | Area    | % Area | Height |
|---|-------|---------|--------|--------|
| 1 | 2.220 | 25855   | 0.35   | 4500   |
| 2 | 5.351 | 7412608 | 99.65  | 583990 |

Reported by User: System  
Report Method: Default Individual Report  
Report Method ID: 1002  
Page: 1 of 1

Project Name: test\_chemistry  
Date Printed: 5/1/2008  
5:31:41 PM Asia/Calcutta

**Compound 9h:**

**Solvent system: (20%water : 80%Acetonitrile)**

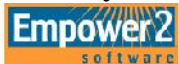

**Default Individual Report**

**SAMPLE INFORMATION**

|                   |                         |                     |                     |
|-------------------|-------------------------|---------------------|---------------------|
| Sample Name:      | 3Me_20water_80ACN_1     | Acquired By:        | System              |
| Sample Type:      | Unknown                 | Sample Set Name:    |                     |
| Vial:             | 1                       | Acq. Method Set:    | 20_water_80_AcN_1ml |
| Injection #:      | 4                       | Processing Method:  | 3Me_1               |
| Injection Volume: | 10.00 ul                | Channel Name:       | 240.0nm             |
| Run Time:         | 10.0 Minutes            | Proc. Chnl. Descr.: | FDA 240.0 nm        |
| Date Acquired:    | 5/7/2008 4:21:14 PM IST |                     |                     |
| Date Processed:   | 5/7/2008 5:15:32 PM IST |                     |                     |

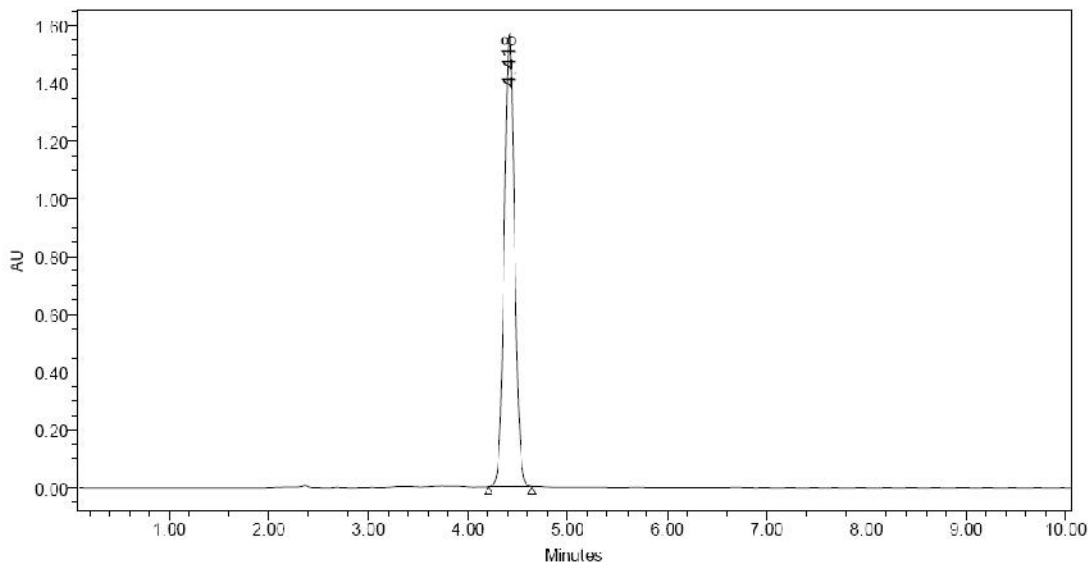

|   | RT    | Area     | % Area | Height  |
|---|-------|----------|--------|---------|
| 1 | 4.418 | 11327805 | 100.00 | 1580045 |

Reported by User: System  
Report Method: Default Individual Report  
Report Method ID: 1002  
Page: 1 of 1

Project Name: test\_chemistry  
Date Printed:  
5/7/2008  
5:16:12 PM Asia/Calcutta

**Compound 9s:**  
**Solvent system: (20%water : 80%methanol)**



Default Individual Report

| SAMPLE INFORMATION |                           |                     |                      |
|--------------------|---------------------------|---------------------|----------------------|
| Sample Name:       | 4CF3_20water_80methanol_1 | Acquired By:        | System               |
| Sample Type:       | Unknown                   | Sample Set Name:    |                      |
| Vial:              | 1                         | Acq. Method Set:    | 20%water_80%Meth_1ml |
| Injection #:       | 3                         | Processing Method:  | 4CF3_1               |
| Injection Volume:  | 10.00 ul                  | Channel Name:       | 235.0nm              |
| Run Time:          | 20.0 Minutes              | Proc. Chnl. Descr.: | PDA 235.0 nm         |
|                    |                           |                     |                      |
| Date Acquired:     | 5/3/2008 3:59:16 PM IST   |                     |                      |
| Date Processed:    | 5/3/2008 5:00:30 PM IST   |                     |                      |

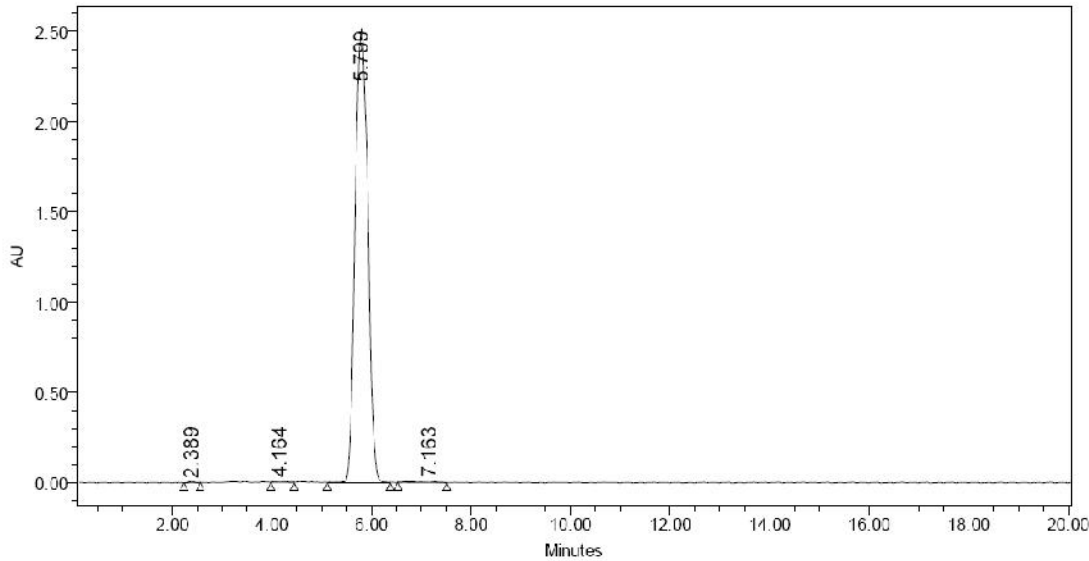

|   | RT    | Area     | % Area | Height  |
|---|-------|----------|--------|---------|
| 1 | 2.389 | 52777    | 0.12   | 6695    |
| 2 | 4.164 | 83655    | 0.19   | 5991    |
| 3 | 5.799 | 44804327 | 99.14  | 2514598 |
| 4 | 7.163 | 252652   | 0.56   | 9006    |

Reported by User: System  
Report Method: Default Individual Report  
Report Method ID: 1002  
Page: 1 of 1

Project Name: test\_chemistry  
Date Printed: 5/3/2008  
5:01:14 PM Asia/Calcutta

**Compound 9s:**  
**Solvent system: (20%water : 80%Acetonitrile)**

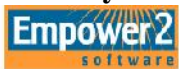

Default Individual Report

| SAMPLE INFORMATION |                         |                     |                     |
|--------------------|-------------------------|---------------------|---------------------|
| Sample Name:       | 4CF3_20water_80ACN_1    | Acquired By:        | System              |
| Sample Type:       | Unknown                 | Sample Set Name:    |                     |
| Vial:              | 1                       | Acq. Method Set:    | 20_water_80_AcN_1ml |
| Injection #:       | 9                       | Processing Method:  | 4CF3_1              |
| Injection Volume:  | 10.00 ul                | Channel Name:       | 252.0nm             |
| Run Time:          | 10.0 Minutes            | Proc. Chnl. Descr.: | PDA 252.0 nm        |
| Date Acquired:     | 5/8/2008 3:21:17 PM IST |                     |                     |
| Date Processed:    | 5/8/2008 4:25:45 PM IST |                     |                     |

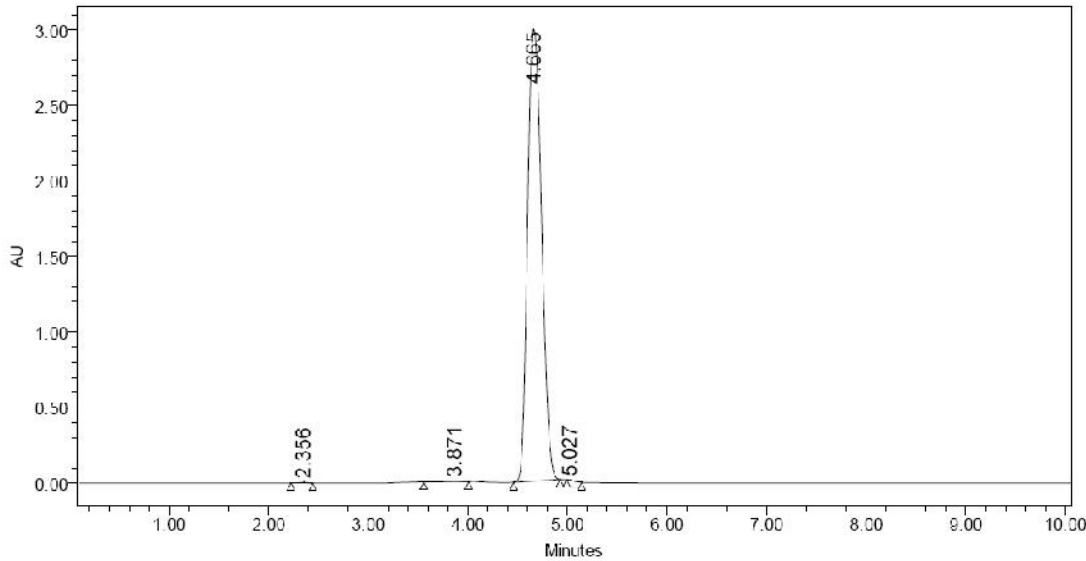

|   | RT    | Area     | % Area | Height  |
|---|-------|----------|--------|---------|
| 1 | 2.356 | 21884    | 0.07   | 4374    |
| 2 | 3.871 | 76042    | 0.26   | 5452    |
| 3 | 4.665 | 29437042 | 99.65  | 3008367 |
| 4 | 5.027 | 6169     | 0.02   | 1315    |

Reported by User: System  
Report Method: Default Individual Report  
Report Method ID: 1002  
Page: 1 of 1

Project Name: test\_chemistry  
Date Printed: 5/8/2008  
4:26:17 PM Asia/Calcutta

**Compound 7k:**  
**Solvent system: (20%water : 80%methanol)**

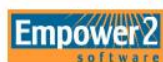

Default Individual Report

| SAMPLE                                  |                              | INFORMATION         |                       |
|-----------------------------------------|------------------------------|---------------------|-----------------------|
| Sample Name:                            | DiOMeU_20w ater_80methanol_1 | Acquired By:        | System                |
| Sample Type:                            | Unknown                      | Sample Set Name:    |                       |
| Vial:                                   | 1                            | Acq. Method Set:    | 20%w ater_80%Meth_1ml |
| Injection #:                            | 2                            | Processing Method:  | 2,3DiOMeU_1           |
| Injection Volume:                       | 10.00 ul                     | Channel Name:       | 235.0nm               |
| Run Time:                               | 20.0 Minutes                 | Proc. Chnl. Descr.: | PDA 235.0 nm          |
| Date Acquired: 5/3/2008 12:49:50 PM IST |                              |                     |                       |
| Date Processed: 5/3/2008 3:18:15 PM IST |                              |                     |                       |

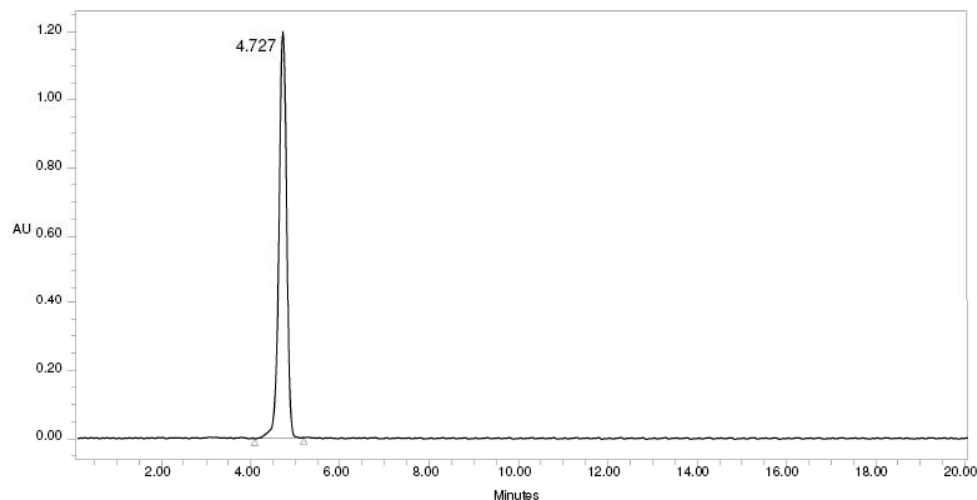

|   | RT    | Area     | % Area | Height  |
|---|-------|----------|--------|---------|
| 1 | 4.727 | 14400640 | 100.00 | 1200797 |



**Compound 7k:**

**Solvent system: (20%water : 80%Acetonitrile)**

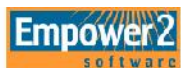

Default Individual Report

SAMPLE INFORMATION

|                   |                          |                     |                     |
|-------------------|--------------------------|---------------------|---------------------|
| Sample Name:      | DIOMeU_20water_80ACN_1   | Acquired By:        | System              |
| Sample Type:      | Unknown                  | Sample Set Name:    |                     |
| Vial:             | 1                        | Acq. Method Set:    | 20_water_80_AcN_1ml |
| Injection #:      | 3                        | Processing Method:  | DIOMe_1             |
| Injection Volume: | 10.00 ul                 | Channel Name:       | 240.0nm             |
| Run Time:         | 10.0 Minutes             | Proc. Chnl. Descr.: | FDA 240.0 nm        |
| Date Acquired:    | 5/8/2008 12:52:50 PM IST |                     |                     |
| Date Processed:   | 5/8/2008 4:02:10 PM IST  |                     |                     |

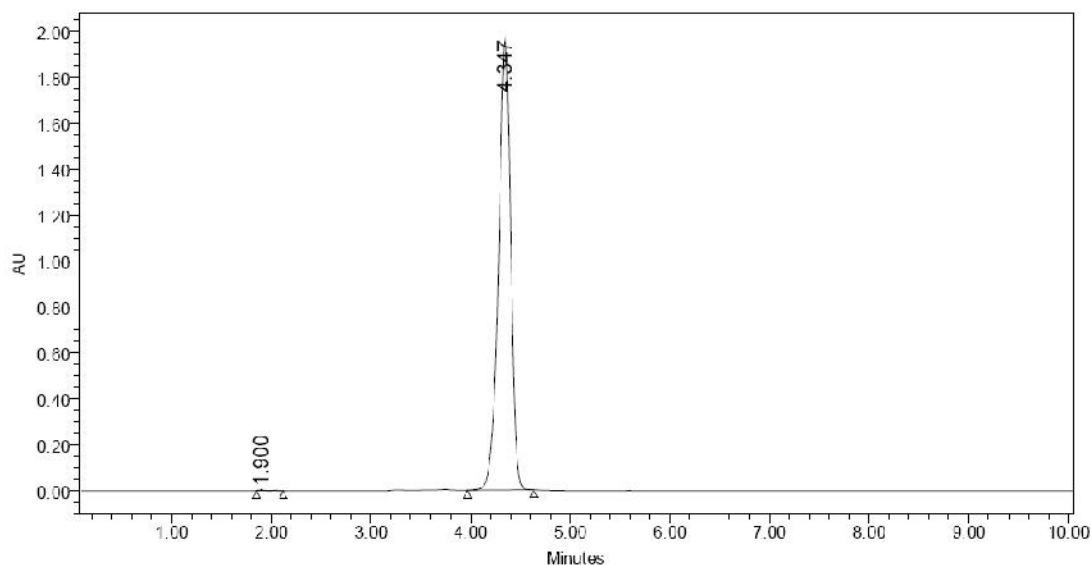

|   | RT    | Area     | % Area | Height  |
|---|-------|----------|--------|---------|
| 1 | 1.900 | 13968    | 0.08   | 2655    |
| 2 | 4.347 | 16613455 | 99.92  | 1979937 |

Reported by User: System  
Report Method: Default Individual Report  
Report Method ID: 1002  
Page: 1 of 1

Project Name: test\_chemistry  
Date Printed: 5/8/2008  
4:03:01 PM Asia/Calcutta

**Compound 7l:**  
**Solvent system: (20%water : 80%methanol)**



Default Individual Report

| SAMPLE INFORMATION |                           |                     |                      |
|--------------------|---------------------------|---------------------|----------------------|
| Sample Name:       | 4CNU-20water_80Methanol_1 | Acquired By:        | System               |
| Sample Type:       | Unknown                   | Sample Set Name:    |                      |
| Vial:              | 1                         | Acq. Method Set:    | 20%water_80%Meth_1ml |
| Injection #:       | 1                         | Processing Method:  | 4CNU3                |
| Injection Volume:  | 10.00 ul                  | Channel Name:       | 332.0nm              |
| Run Time:          | 20.0 Minutes              | Proc. Chnl. Descr.: | PDA 332.0 nm         |
| Date Acquired:     | 5/2/2008 4:27:34 PM IST   |                     |                      |
| Date Processed:    | 5/2/2008 4:54:29 PM IST   |                     |                      |

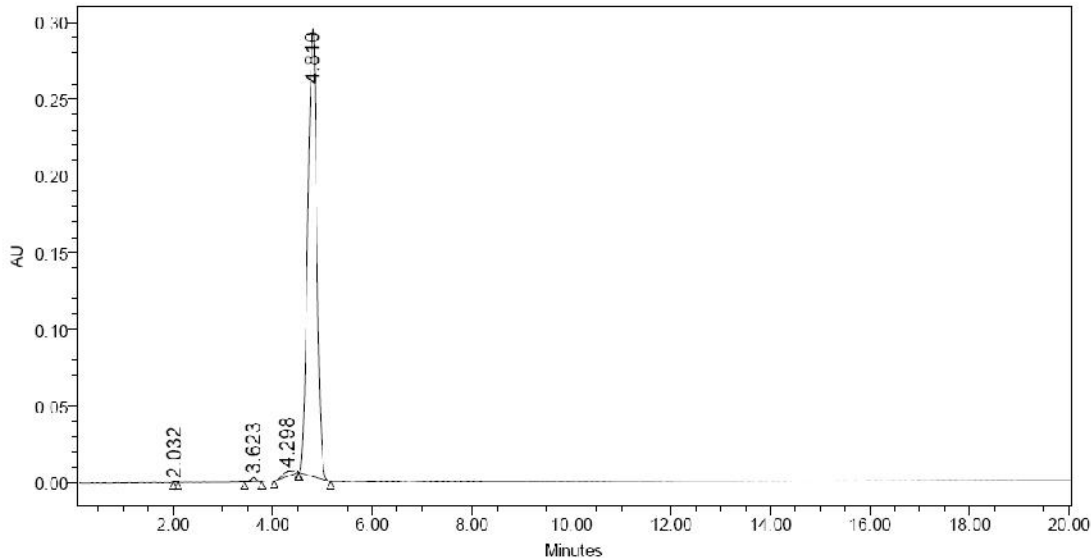

|   | RT    | Area    | % Area | Height |
|---|-------|---------|--------|--------|
| 1 | 2.032 | 588     | 0.02   | 159    |
| 2 | 3.623 | 22832   | 0.60   | 2928   |
| 3 | 4.298 | 47372   | 1.25   | 2820   |
| 4 | 4.810 | 3715082 | 98.13  | 292349 |

Reported by User: System  
Report Method: Default Individual Report  
Report Method ID: 1002  
Page: 1 of 1

Project Name: test\_chemistry  
Date Printed: 5/2/2008  
4:55:46 PM Asia/Calcutta

**Compound 7l:**  
**Solvent system: (20%water : 80%Acetonitrile)**



Default Individual Report

| SAMPLE INFORMATION |                         |                     |                     |
|--------------------|-------------------------|---------------------|---------------------|
| Sample Name:       | 4CNU_20water_80ACN_2    | Acquired By:        | System              |
| Sample Type:       | Unknown                 | Sample Set Name:    |                     |
| Vial:              | 1                       | Acq. Method Set:    | 20_water_80_AcN_1ml |
| Injection #:       | 2                       | Processing Method:  | 4CNU_2              |
| Injection Volume:  | 10.00 ul                | Channel Name:       | 260.0nm             |
| Run Time:          | 10.0 Minutes            | Proc. Chnl. Descr.: | PDA 260.0 nm        |
|                    |                         |                     |                     |
| Date Acquired:     | 5/7/2008 3:59:05 PM IST |                     |                     |
| Date Processed:    | 5/7/2008 5:09:49 PM IST |                     |                     |

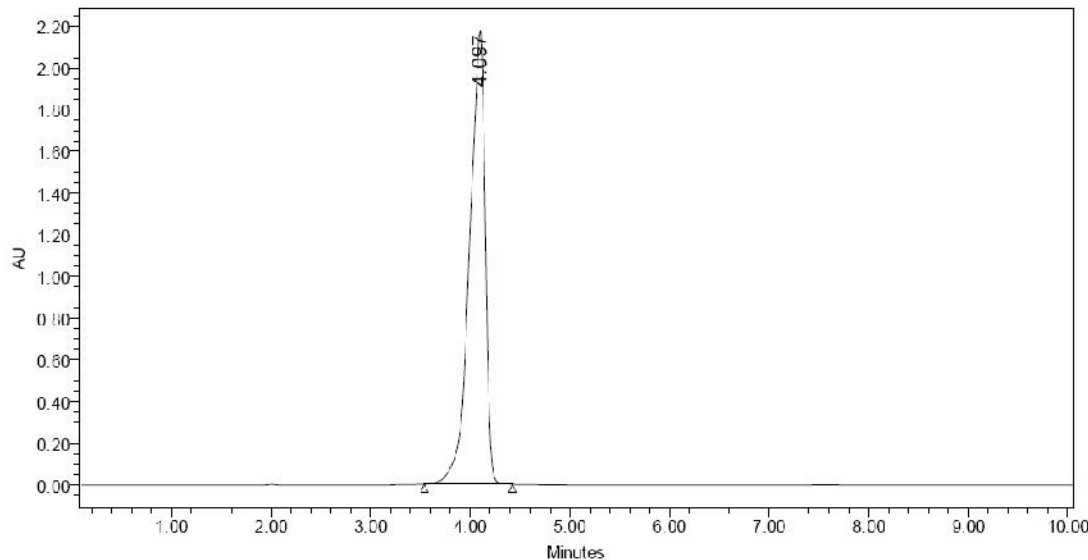

|   | RT    | Area     | % Area | Height  |
|---|-------|----------|--------|---------|
| 1 | 4.097 | 23775220 | 100.00 | 2193275 |

Reported by User: System  
Report Method: Default Individual Report  
Report Method ID: 1002  
Page: 1 of 1

Project Name: test\_chemistry  
Date Printed: 5/7/2008  
5:10:20 PM Asia/Calcutta

## HPLC chromatograms of selected known final compounds

### Compound 10b:

Solvent system: (20%water : 80%Acetonitrile)

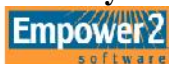

### Default Individual Report

#### SAMPLE INFORMATION

|                   |                         |                     |                    |
|-------------------|-------------------------|---------------------|--------------------|
| Sample Name:      | 7b_20water_80AcN_1      | Acquired By:        | System             |
| Sample Type:      | Unknown                 | Sample Set Name:    |                    |
| Vial:             | 1                       | Acq. Method Set:    | 02_Water_80AcN_1ml |
| Injection #:      | 2                       | Processing Method:  | 7b_20water_80AcN   |
| Injection Volume: | 10.00 ul                | Channel Name:       | 220.0nm            |
| Run Time:         | 10.0 Minutes            | Proc. Chnl. Descr.: | FDA 220.0 nm       |
| Date Acquired:    | 6/5/2008 3:32:28 PM IST |                     |                    |
| Date Processed:   | 6/5/2008 4:26:35 PM IST |                     |                    |

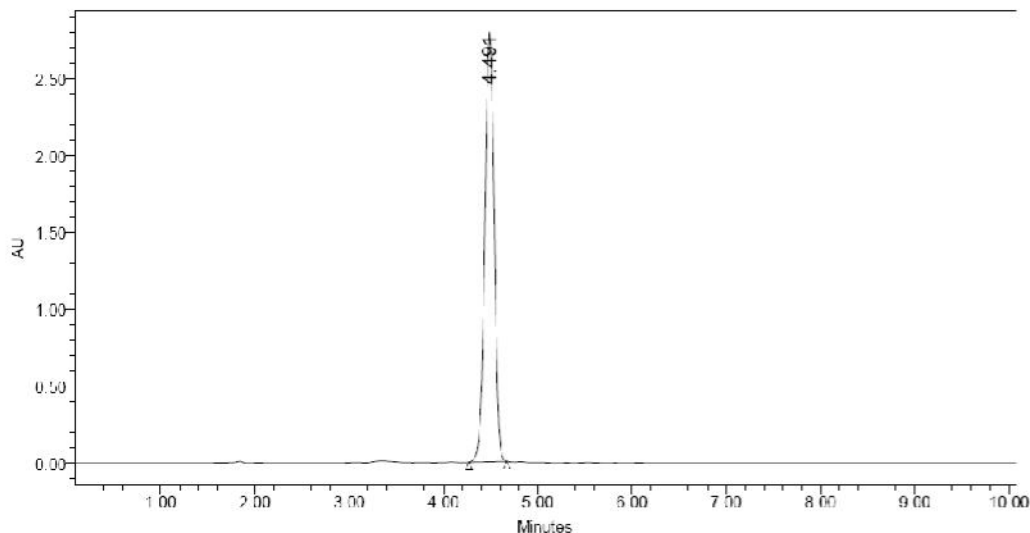

|   | RT    | Area     | % Area | Height  |
|---|-------|----------|--------|---------|
| 1 | 4.491 | 19275306 | 100.00 | 2787201 |

Reported by User: System  
Report Method: Default Individual Report  
Report Method ID: 1002  
Page: 1 of 1

Project Name: test\_chemistry  
Date Printed:  
6/5/2008  
4:27:19 PM Asia/Calcutta

**Compound 10c:**

**Solvent system: (20%water : 80%Acetonitrile)**



Default Individual Report

SAMPLE INFORMATION

|                   |                         |                     |                    |
|-------------------|-------------------------|---------------------|--------------------|
| Sample Name:      | 7c_20water_80AcN_1      | Acquired By:        | System             |
| Sample Type:      | Unknown                 | Sample Set Name:    |                    |
| Vial:             | 1                       | Acq. Method Set:    | 02_Water_80AcN_1ml |
| Injection #:      | 4                       | Processing Method:  | 7c_20water_80AcN   |
| Injection Volume: | 10.00 ul                | Channel Name:       | 240.0nm            |
| Run Time:         | 10.0 Minutes            | Proc. Chnl. Descr.: | FDA 240.0 nm       |
| Date Acquired:    | 6/5/2008 4:13:42 PM IST |                     |                    |
| Date Processed:   | 6/5/2008 4:36:36 PM IST |                     |                    |

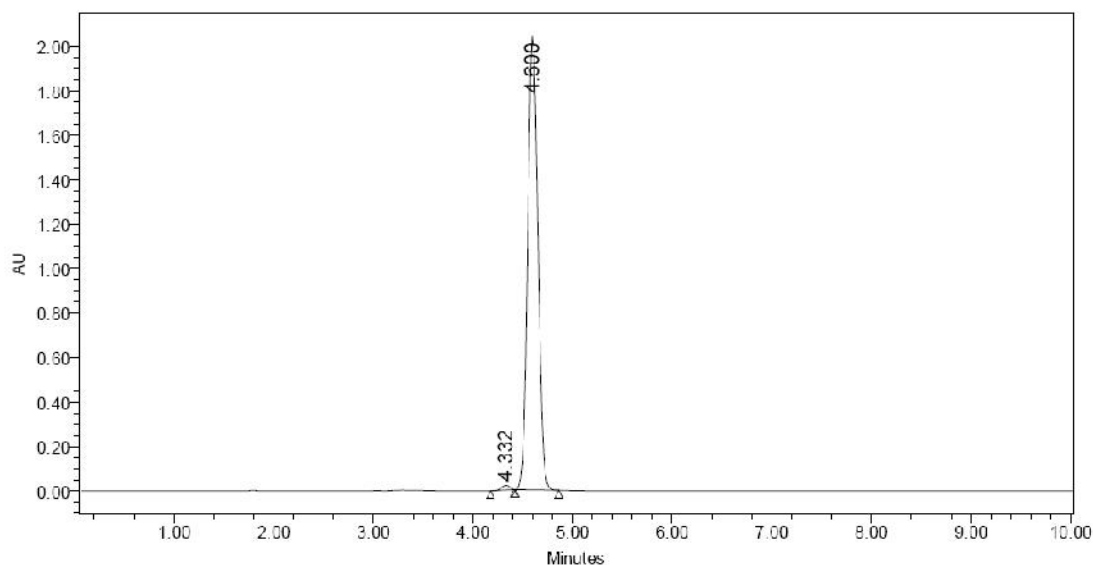

|   | RT    | Area     | % Area | Height  |
|---|-------|----------|--------|---------|
| 1 | 4.332 | 114601   | 0.78   | 20982   |
| 2 | 4.600 | 14563614 | 99.22  | 2042523 |

Reported by User: System  
Report Method: Default Individual Report  
Report Method ID: 1002  
Page: 1 of 1

Project Name: test\_chemistry  
Date Printed: 6/5/2008  
4:37:43 PM Asia/Calcutta

**Compound 10g:**

**Solvent system: (20%water : 80%Acetonitrile)**



Default Individual Report

SAMPLE INFORMATION

|                   |                         |                     |                    |
|-------------------|-------------------------|---------------------|--------------------|
| Sample Name:      | 7g_20water_80AcN_1      | Acquired By:        | System             |
| Sample Type:      | Unknown                 | Sample Set Name:    |                    |
| Vial:             | 1                       | Acq. Method Set:    | 02_Water_80AcN_1ml |
| Injection #:      | 5                       | Processing Method:  | 7g_20water_80AcN   |
| Injection Volume: | 10.00 ul                | Channel Name:       | 270.0nm            |
| Run Time:         | 10.0 Minutes            | Proc. Chnl. Descr.: | FDA 270.0 nm       |
| Date Acquired:    | 6/5/2008 5:47:40 PM IST |                     |                    |
| Date Processed:   | 6/5/2008 5:58:07 PM IST |                     |                    |

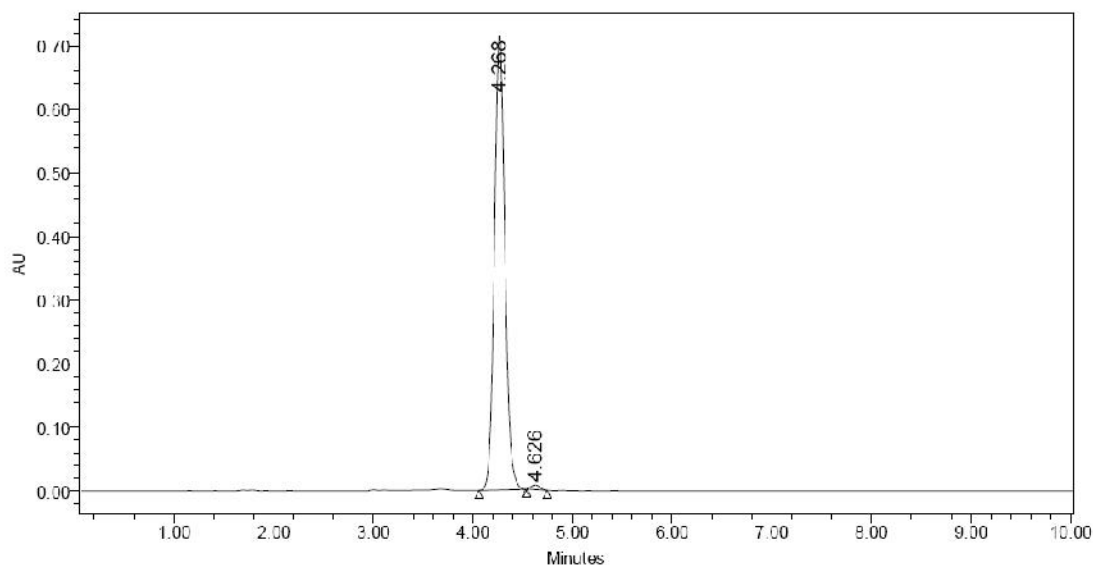

|   | RT    | Area    | % Area | Height |
|---|-------|---------|--------|--------|
| 1 | 4.268 | 5227950 | 99.21  | 717131 |
| 2 | 4.626 | 41870   | 0.79   | 7087   |

Reported by User: System  
Report Method: Default Individual Report  
Report Method ID: 1002  
Page: 1 of 1

Project Name: test\_chemistry  
Date Printed:  
6/5/2008  
5:58:58 PM Asia/Calcutta

**Compound 10h:**  
**Solvent system: (20%water : 80%Acetonitrile)**

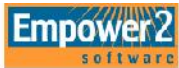

Default Individual Report

| SAMPLE INFORMATION |                         |                     |                    |
|--------------------|-------------------------|---------------------|--------------------|
| Sample Name:       | 7h_20water_80AcN_1      | Acquired By:        | System             |
| Sample Type:       | Unknown                 | Sample Set Name:    |                    |
| Vial:              | 1                       | Acq. Method Set:    | 02_Water_80AcN_1ml |
| Injection #:       | 3                       | Processing Method:  | 7h_20water_80AcN   |
| Injection Volume:  | 10.00 ul                | Channel Name:       | 254.0nm            |
| Run Time:          | 10.0 Minutes            | Proc. Chnl. Descr.: | FDA 254.0 nm       |
|                    |                         |                     |                    |
| Date Acquired:     | 6/5/2008 3:59:57 PM IST |                     |                    |
| Date Processed:    | 6/5/2008 4:32:42 PM IST |                     |                    |

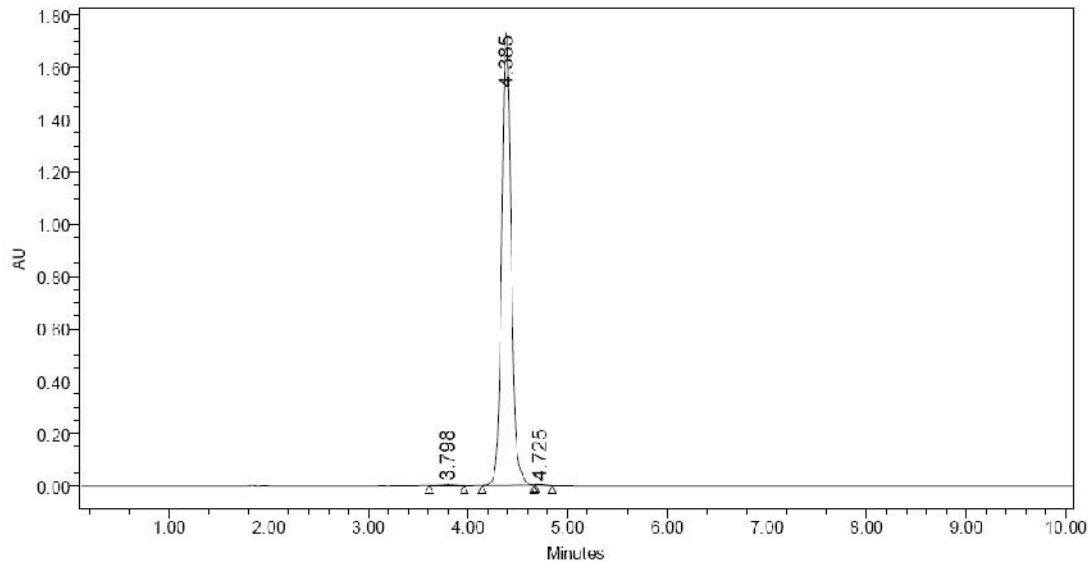

|   | RT    | Area     | % Area | Height  |
|---|-------|----------|--------|---------|
| 1 | 3.798 | 28527    | 0.25   | 2613    |
| 2 | 4.385 | 11426521 | 99.67  | 1745140 |
| 3 | 4.725 | 9012     | 0.08   | 1797    |

**Compound 8b:**  
**Solvent system: (20%water : 80%Acetonitrile)**

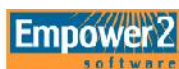

Default Individual Report

| SAMPLE INFORMATION |                         |                     |                    |
|--------------------|-------------------------|---------------------|--------------------|
| Sample Name:       | 8b_20water_80AcN_1      | Acquired By:        | System             |
| Sample Type:       | Unknown                 | Sample Set Name:    |                    |
| Vial:              | 1                       | Acq. Method Set:    | 02_Water_80AcN_1ml |
| Injection #:       | 1                       | Processing Method:  | 8b_20water_80AcN   |
| Injection Volume:  | 10.00 ul                | Channel Name:       | 250.0nm            |
| Run Time:          | 10.0 Minutes            | Proc. Chnl. Descr.: | FDA 250.0 nm       |
| Date Acquired:     | 6/5/2008 4:52:37 PM IST |                     |                    |
| Date Processed:    | 6/5/2008 5:18:52 PM IST |                     |                    |

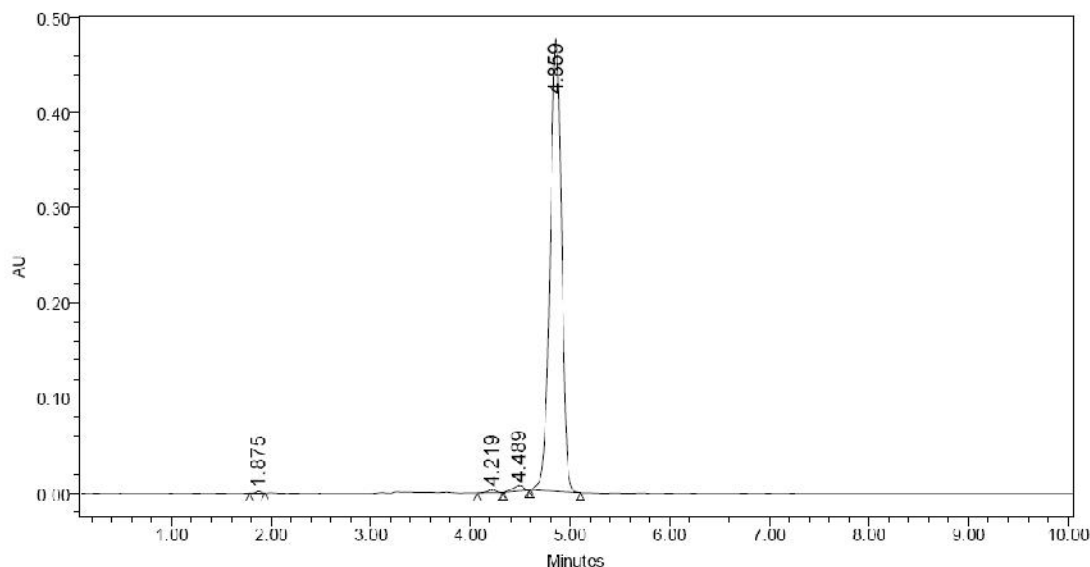

|   | RT    | Area    | % Area | Height |
|---|-------|---------|--------|--------|
| 1 | 1.875 | 8350    | 0.22   | 2106   |
| 2 | 4.219 | 18148   | 0.47   | 2989   |
| 3 | 4.489 | 40197   | 1.05   | 5549   |
| 4 | 4.859 | 3764071 | 98.26  | 476488 |

Reported by User: System  
Report Method: Default Individual Report  
Report Method ID: 1002  
Page: 1 of 1

Project Name: test\_chemistry  
Date Printed:  
6/5/2008  
5:20:03 PM Asia/Calcutta



**Compound 8c:**  
**Solvent system: (20%water : 80%Acetonitrile)**

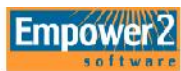

Default Individual Report

| SAMPLE INFORMATION |                         |                     |                    |
|--------------------|-------------------------|---------------------|--------------------|
| Sample Name:       | 8c_20water_80AcN_1      | Acquired By:        | System             |
| Sample Type:       | Unknown                 | Sample Set Name:    |                    |
| Vial:              | 1                       | Acq. Method Set:    | 02_Water_80AcN_1ml |
| Injection #:       | 1                       | Processing Method:  | 8c_20water_80AcN_1 |
| Injection Volume:  | 10.00 ul                | Channel Name:       | 220.0nm            |
| Run Time:          | 20.0 Minutes            | Proc. Chnl. Descr.: | FDA 220.0 nm       |
|                    |                         |                     |                    |
| Date Acquired:     | 6/5/2008 1:24:28 PM IST |                     |                    |
| Date Processed:    | 6/5/2008 2:29:28 PM IST |                     |                    |

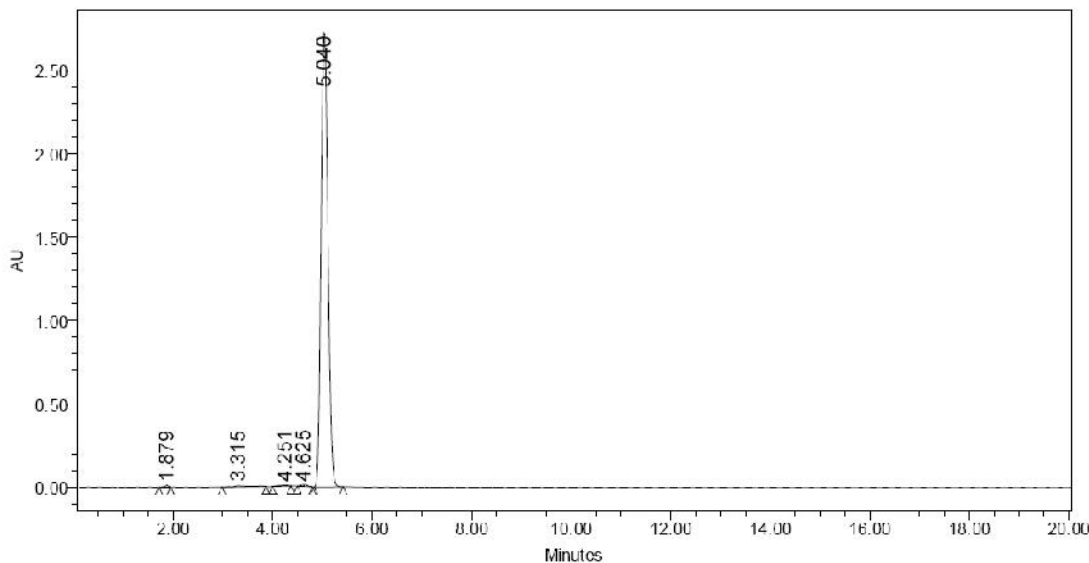

|   | RT    | Area     | % Area | Height  |
|---|-------|----------|--------|---------|
| 1 | 1.879 | 48446    | 0.17   | 9976    |
| 2 | 3.315 | 120767   | 0.45   | 7232    |
| 3 | 4.251 | 73646    | 0.28   | 5205    |
| 4 | 4.625 | 97688    | 0.37   | 10044   |
| 5 | 5.040 | 26303040 | 98.73  | 2730969 |

**Compound 8g:**  
**Solvent system: (20%water : 80%Acetonitrile)**



## Default Individual Report

### SAMPLE INFORMATION

|                                         |                    |                     |                    |
|-----------------------------------------|--------------------|---------------------|--------------------|
| Sample Name:                            | 8g_20water_80AcN_1 | Acquired By:        | System             |
| Sample Type:                            | Unknown            | Sample Set Name:    |                    |
| Vial:                                   | 1                  | Acq. Method Set:    | 02_Water_80AcN_1ml |
| Injection #:                            | 2                  | Processing Method:  | 8g_20water_80AcN   |
| Injection Volume:                       | 10.00 ul           | Channel Name:       | 290.0nm            |
| Run Time:                               | 10.0 Minutes       | Proc. Chnl. Descr.: | FDA 290.0 nm       |
| Date Acquired: 6/5/2008 5:03:52 PM IST  |                    |                     |                    |
| Date Processed: 6/5/2008 5:25:30 PM IST |                    |                     |                    |

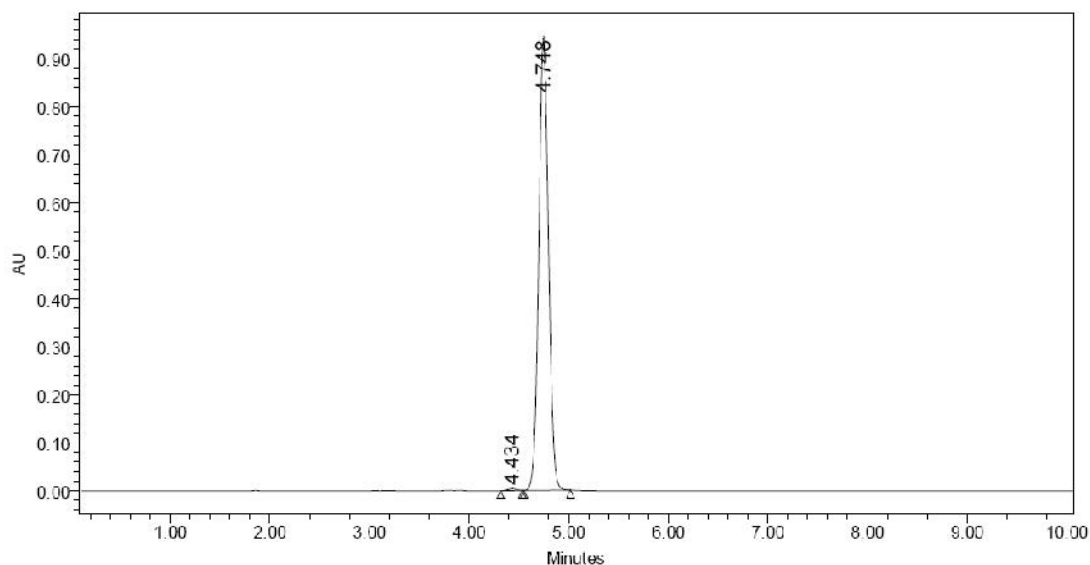

|   | RT    | Area    | % Area | Height |
|---|-------|---------|--------|--------|
| 1 | 4.434 | 22443   | 0.35   | 3646   |
| 2 | 4.748 | 6396268 | 99.65  | 942269 |

Reported by User: System  
Report Method: Default Individual Report  
Report Method ID: 1002  
Page: 1 of 1

Project Name: test\_chemistry  
Date Printed: 6/5/2008  
5:26:10 PM Asia/Calcutta

**Compound 8h:**  
**Solvent system: (20%water : 80%Acetonitrile)**



Default Individual Report

| SAMPLE INFORMATION |                         |                     |                    |
|--------------------|-------------------------|---------------------|--------------------|
| Sample Name:       | 8h_20water_80AcN_1      | Acquired By:        | System             |
| Sample Type:       | Unknown                 | Sample Set Name:    |                    |
| Vial:              | 1                       | Acq. Method Set:    | 02_Water_80AcN_1ml |
| Injection #:       | 3                       | Processing Method:  | 8h_20water_80AcN   |
| Injection Volume:  | 10.00 ul                | Channel Name:       | 254.0nm            |
| Run Time:          | 10.0 Minutes            | Proc. Chnl. Descr.: | FDA 254.0 nm       |
| Date Acquired:     | 6/5/2008 5:16:10 PM IST |                     |                    |
| Date Processed:    | 6/5/2008 5:29:08 PM IST |                     |                    |

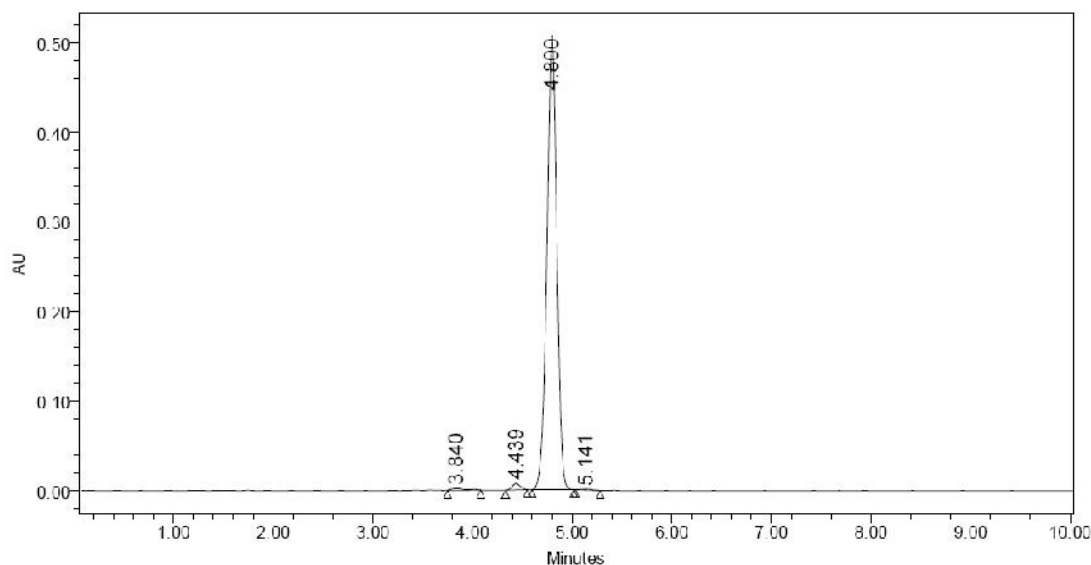

|   | RT    | Area    | % Area | Height |
|---|-------|---------|--------|--------|
| 1 | 3.840 | 21005   | 0.59   | 2119   |
| 2 | 4.439 | 41262   | 1.17   | 7247   |
| 3 | 4.800 | 3470142 | 98.03  | 504206 |
| 4 | 5.141 | 7479    | 0.21   | 1080   |

Reported by User: System  
Report Method: Default Individual Report  
Report Method ID: 1002  
Page: 1 of 1

Project Name: test\_chemistry  
Date Printed: 6/5/2008  
5:29:54 PM Asia/Calcutta

**Compound 8j:**  
**Solvent system: (20%water : 80%Acetonitrile)**



Default Individual Report

SAMPLE INFORMATION

|                   |                         |                     |                    |
|-------------------|-------------------------|---------------------|--------------------|
| Sample Name:      | 8j_20water_80AcN_1      | Acquired By:        | System             |
| Sample Type:      | Unknown                 | Sample Set Name:    |                    |
| Vial:             | 1                       | Acq. Method Set:    | 02_Water_80AcN_1ml |
| Injection #:      | 4                       | Processing Method:  | 8j_20water_80AcN   |
| Injection Volume: | 10.00 ul                | Channel Name:       | 230.0nm            |
| Run Time:         | 10.0 Minutes            | Proc. Chnl. Descr.: | FDA 230.0 nm       |
| Date Acquired:    | 6/5/2008 5:35:14 PM IST |                     |                    |
| Date Processed:   | 6/5/2008 5:49:20 PM IST |                     |                    |

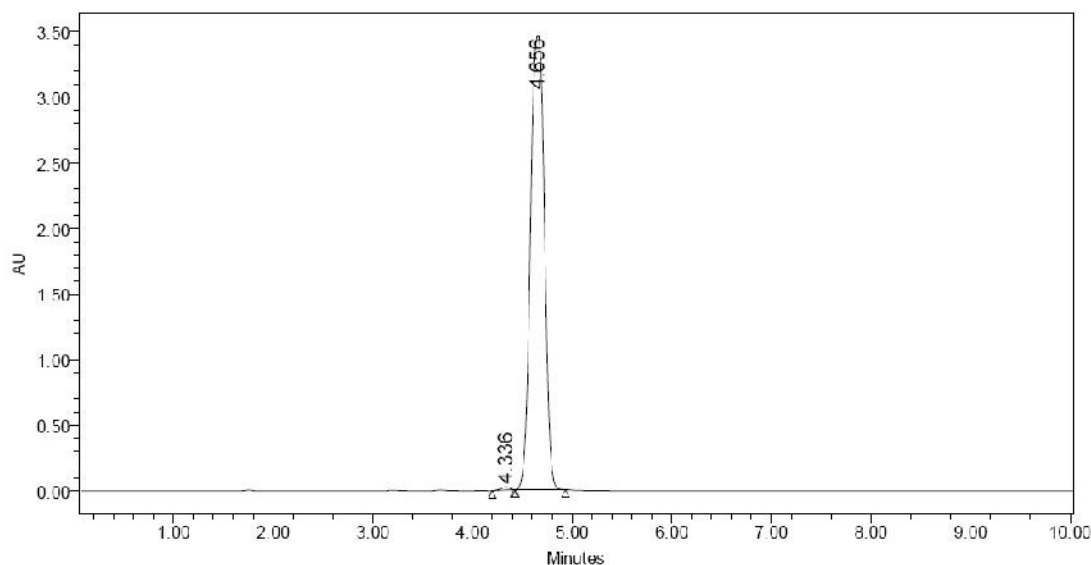

|   | RT    | Area     | % Area | Height  |
|---|-------|----------|--------|---------|
| 1 | 4.336 | 133162   | 0.39   | 22387   |
| 2 | 4.656 | 33622196 | 99.61  | 3479083 |

Reported by User: System  
Report Method: Default Individual Report  
Report Method ID: 1002  
Page: 1 of 1

Project Name: test\_chemistry  
Date Printed:  
6/5/2008  
5:50:12 PM Asia/Calcutta

# S69

## 2D (cosy, hsqc, hmbc) and 1D (NOESY ) NMR spectra for compounds 10c, 8d, 9l and 7l

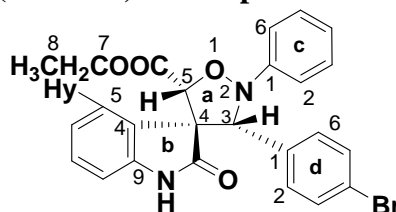

10c

Spectrum: cosy  
User: CEO Date: Tue May 17 08:46:09 2011  
Positive contours: low 7.00e+006 levels 5 factor 2.00  
Negative contours: low -1.00e+007 levels 1 factor 1.40

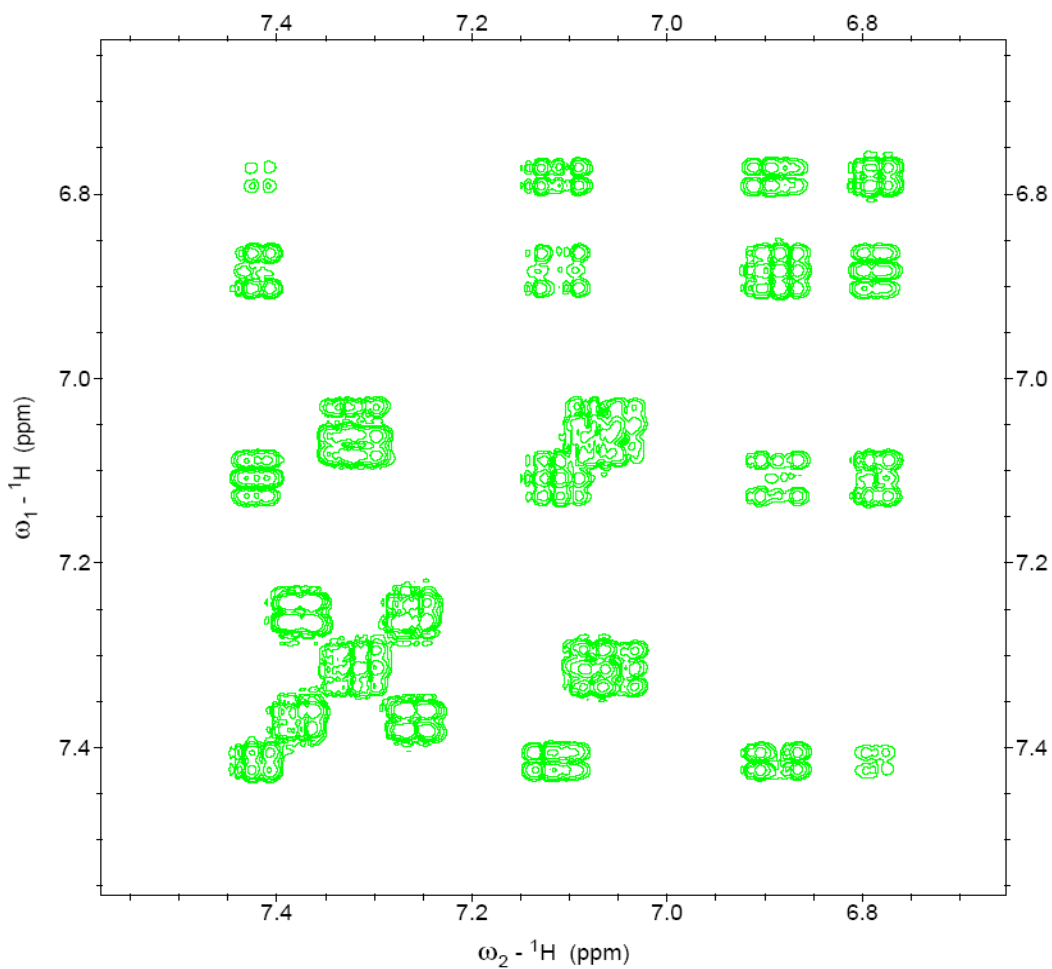

\* The numbering of carbon atoms and the ring numbers shown here are limited to the assignment of spectra here only. It should not be confused with the assignment in experimental part.

S70

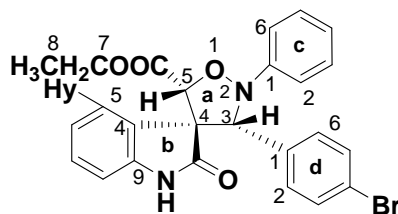

10c

Spectrum: hsqc  
User: CEO Date: Tue May 17 08:45:45 2011  
Positive contours: low 3.00e+006 levels 5 factor 2.00  
Negative contours: low -1.00e+007 levels 1 factor 1.40

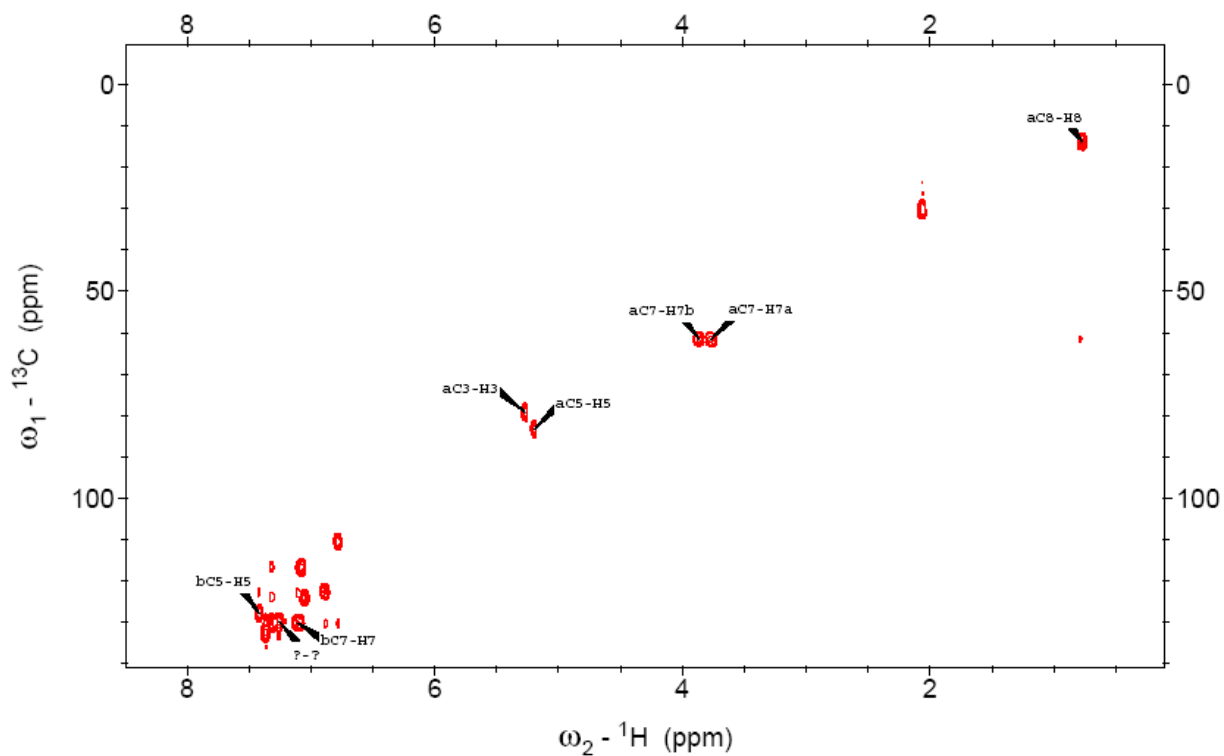

\* The numbering of carbon atoms and the ring numbers shown here are limited to the assignment of spectra here only. It should not be confused with the assignment in experimental part.

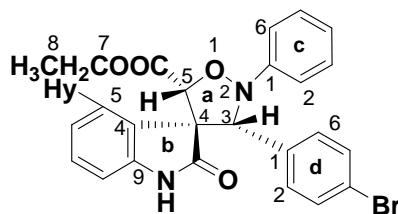

10c

Spectrum: hmbc  
User: CEO Date: Tue May 17 08:44:32 2011  
Positive contours: low 7.00e+005 levels 6 factor 1.40  
Negative contours: low -1.00e+007 levels 1 factor 1.40

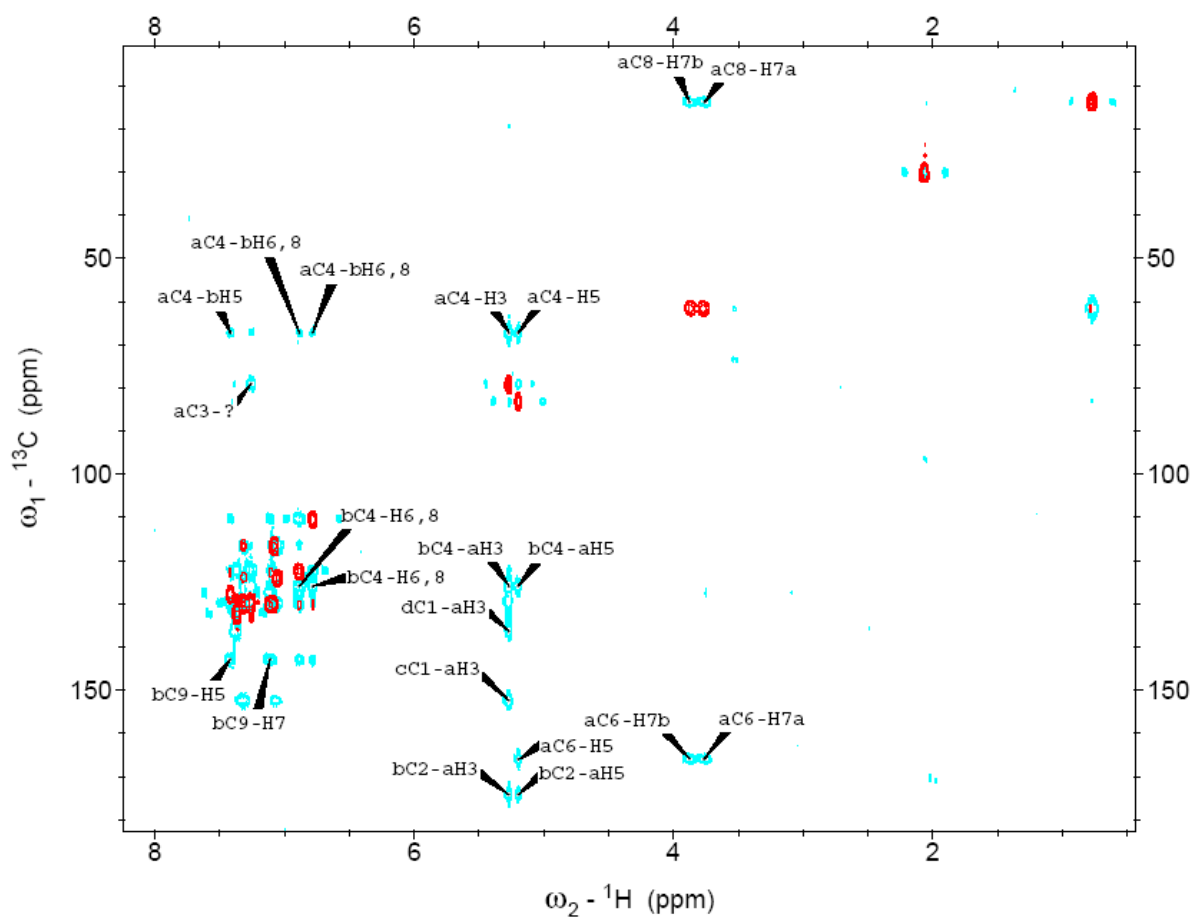

\* The numbering of carbon atoms and the ring numbers shown here are limited to the assignment of spectra here only. It should not be confused with the assignment in experimental part.

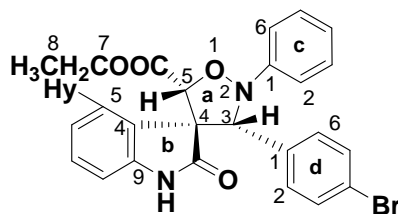

10c

Spectrum: noesy800  
User: CEO Date: Tue May 17 08:52:45 2011  
Positive contours: low 7.00e+004 levels 5 factor 1.40  
Negative contours: low -1.00e+005 levels 1 factor 1.40

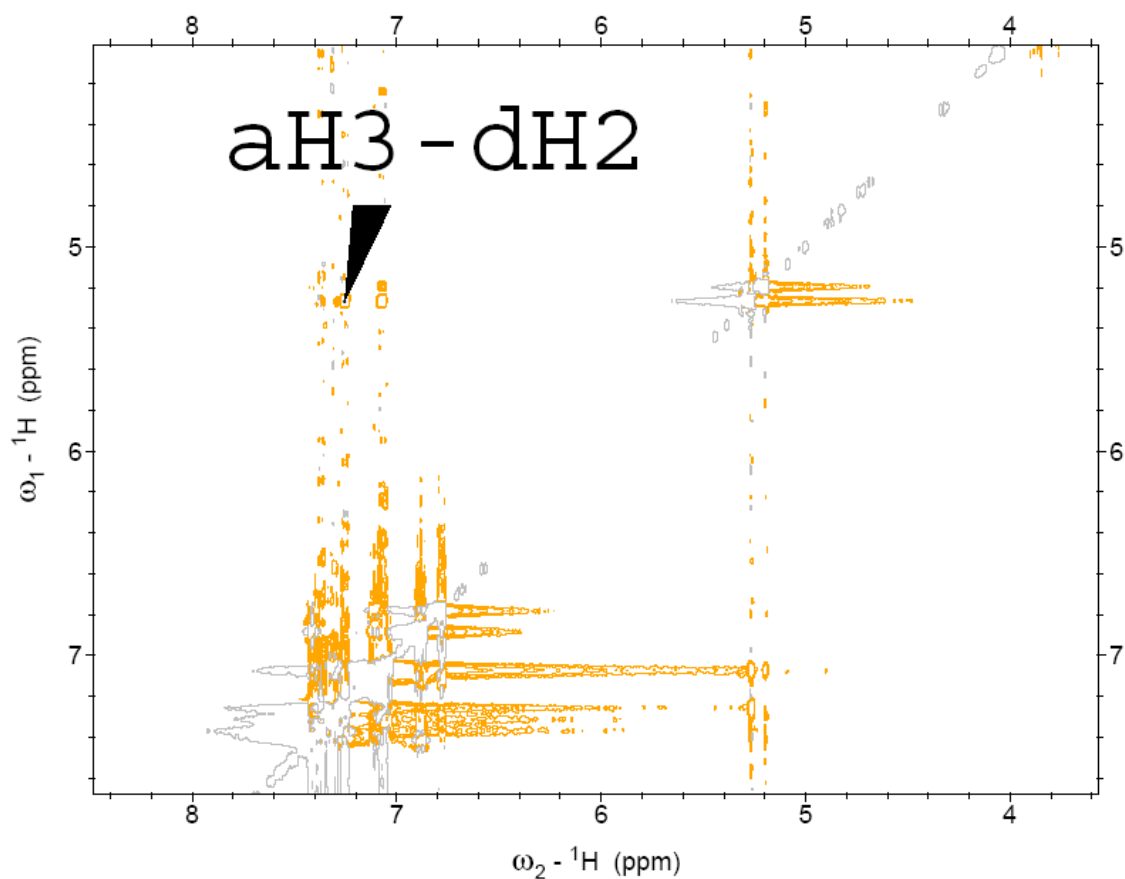

\* The numbering of carbon atoms and the ring numbers shown here are limited to the assignment of spectra here only. It should not be confused with the assignment in experimental part.



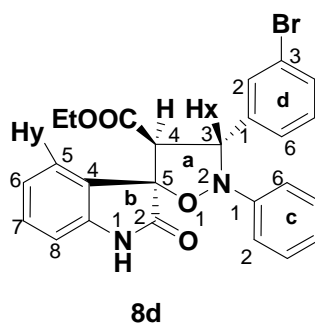

Spectrum: cosy  
User: CEO Date: Tue May 17 09:00:05 2011  
Positive contours: low 3.00e+006 levels 5 factor 1.80  
Negative contours: low -1.00e+007 levels 1 factor 1.40

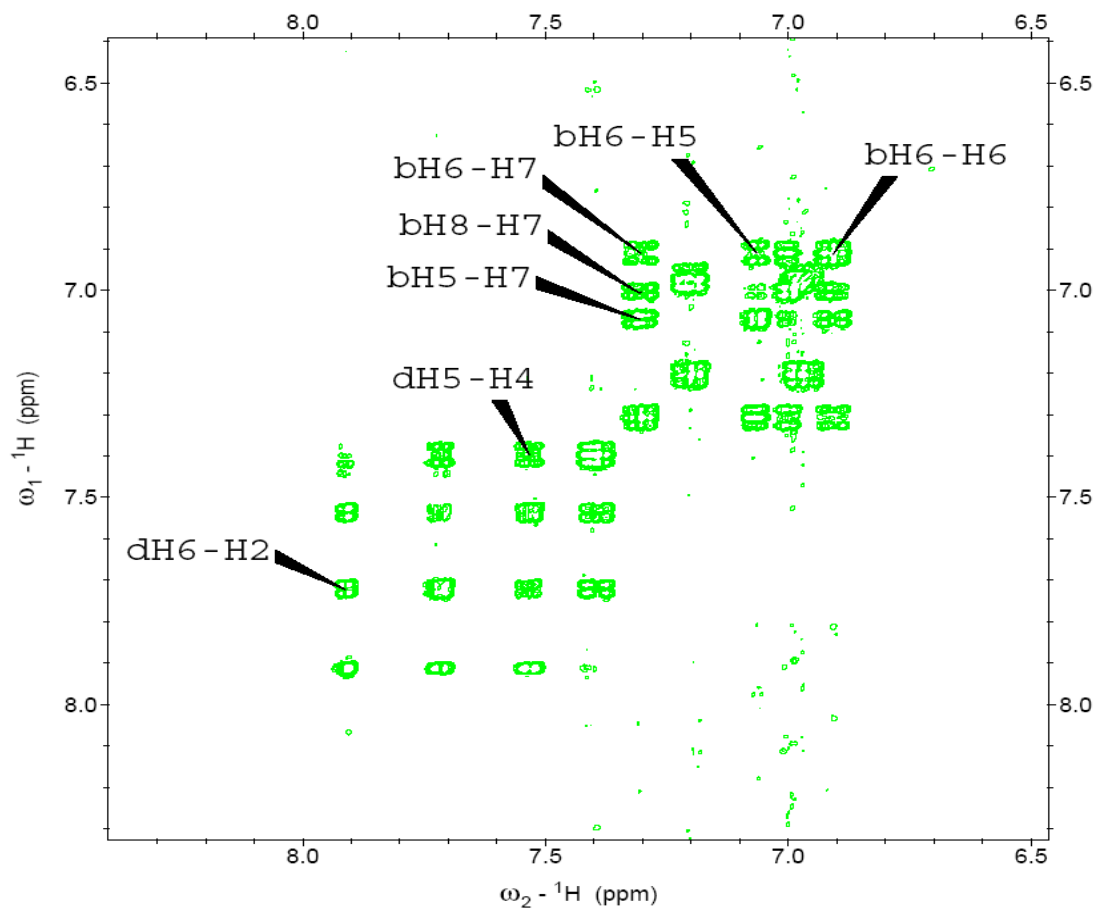

\* The numbering of carbon atoms and the ring numbers shown here are limited to the assignment of spectra here only. It should not be confused with the assignment in experimental part.

S74

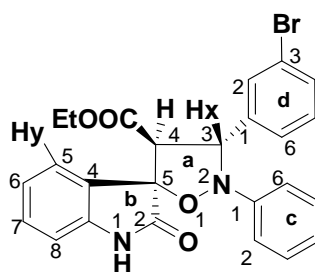

8d

Spectrum: hsqc  
User: CEO Date: Tue May 17 08:59:37 2011  
Positive contours: low 3.00e+006 levels 5 factor 1.80  
Negative contours: low -1.00e+007 levels 1 factor 1.40

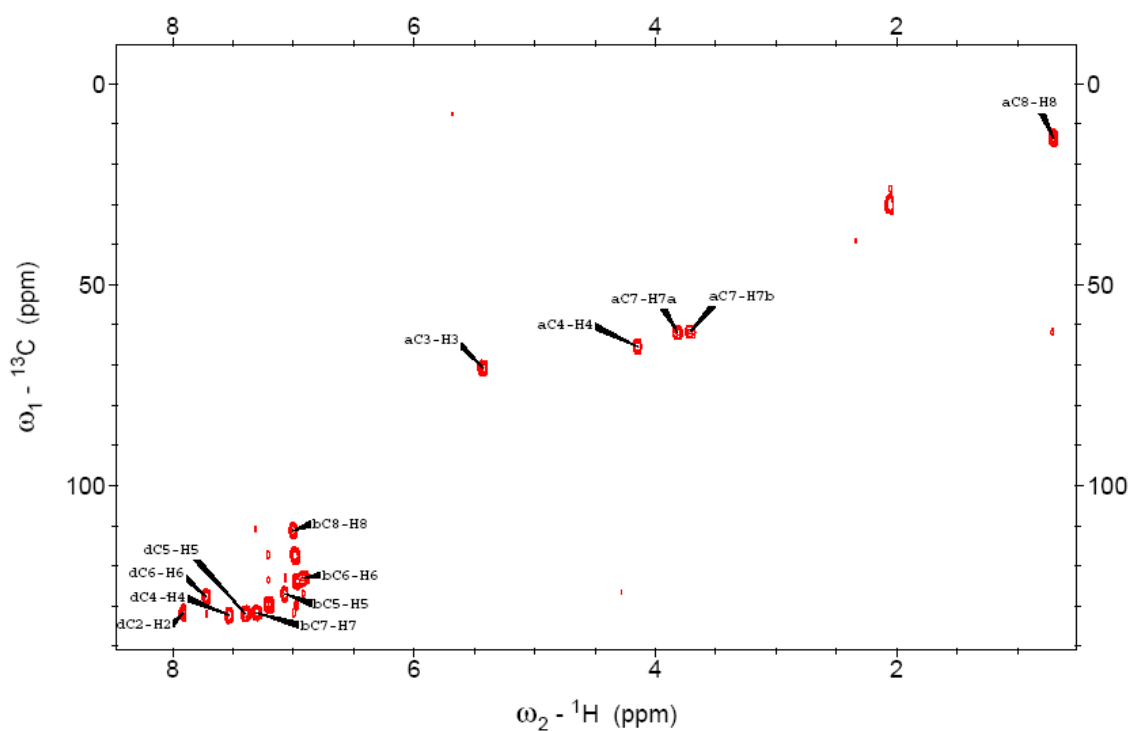

\* The numbering of carbon atoms and the ring numbers shown here are limited to the assignment of spectra here only. It should not be confused with the assignment in experimental part.



8d

Spectrum: hmbc  
User: CEO Date: Tue May 17 08:59:06 2011  
Positive contours: low 3.00e+006 levels 5 factor 2.00  
Negative contours: low -1.00e+007 levels 1 factor 1.40

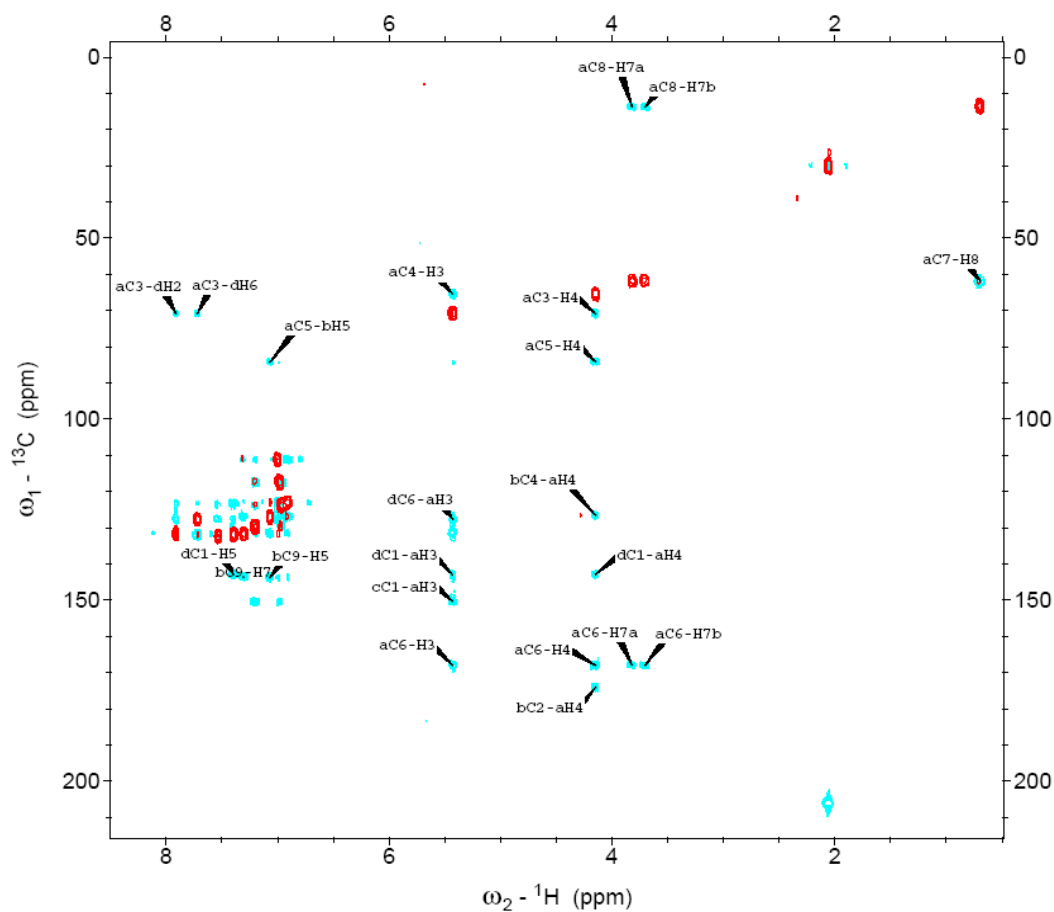

\* The numbering of carbon atoms and the ring numbers shown here are limited to the assignment of spectra here only. It should not be confused with the assignment in experimental part.



8d

Spectrum: noesy300  
User: CEO Date: Tue May 17 09:00:50 2011  
Positive contours: low 1.00e+005 levels 5 factor 1.80  
Negative contours: low -1.00e+006 levels 1 factor 1.40

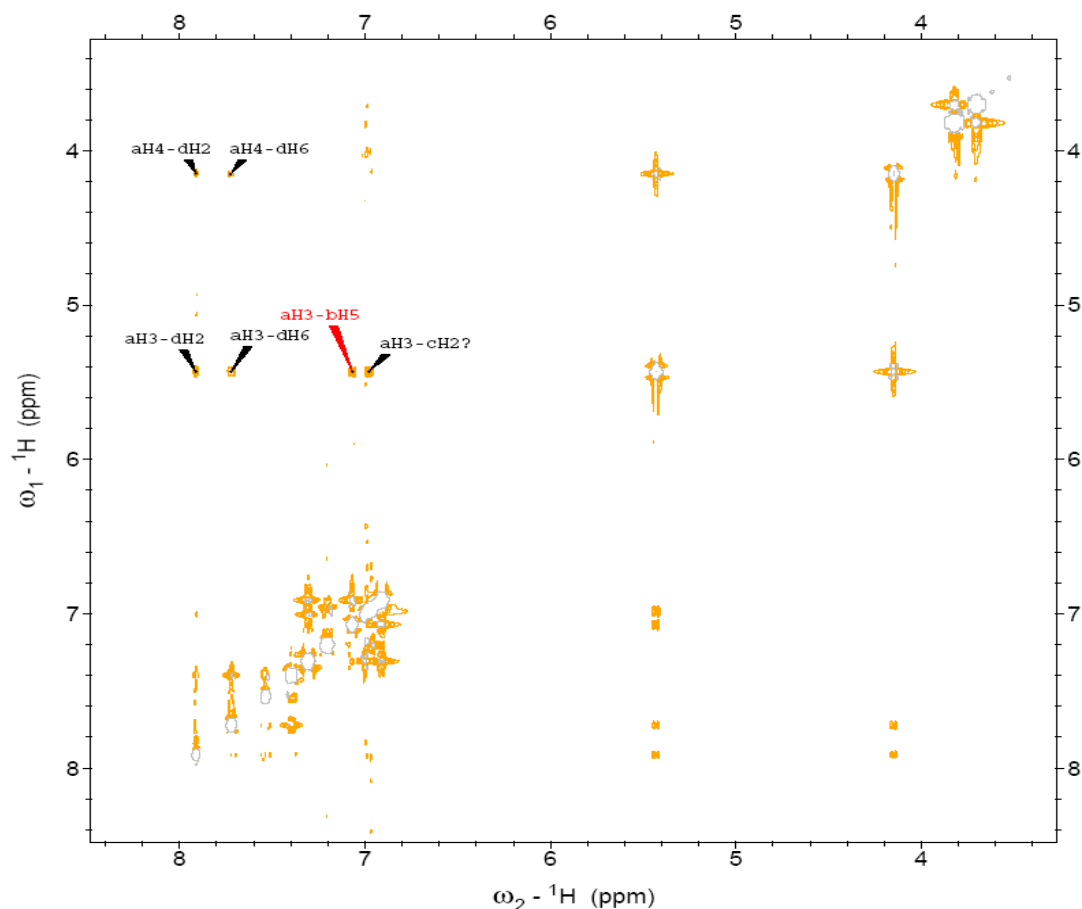

\* The numbering of carbon atoms and the ring numbers shown here are limited to the assignment of spectra here only. It should not be confused with the assignment in experimental part.

S77

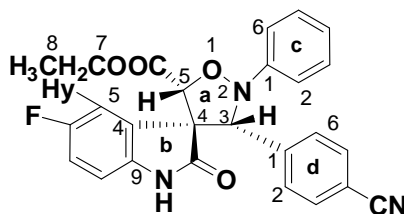

9I

Spectrum: cosy  
User: CEO Date: Tue May 17 09:08:01 2011  
Positive contours: low 5.00e+006 levels 5 factor 2.00  
Negative contours: low -3.00e+006 levels 1 factor 2.00

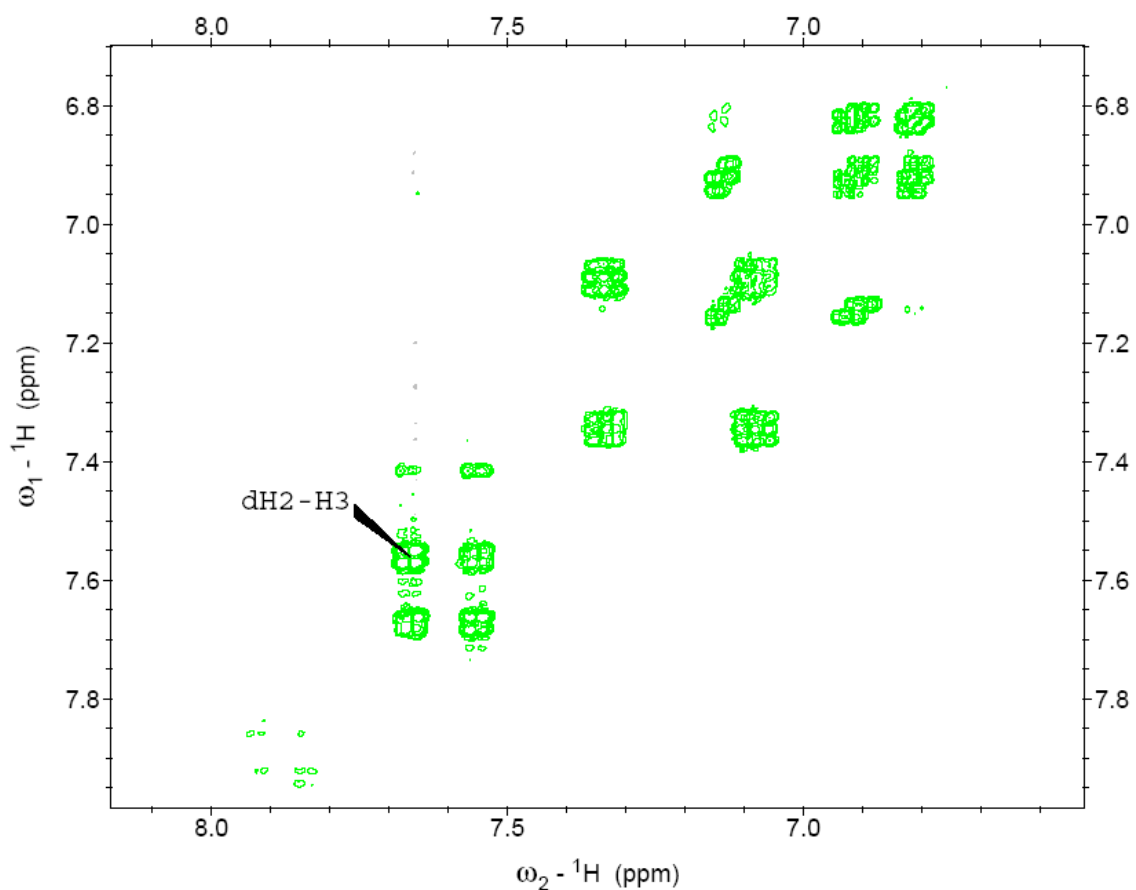

\* The numbering of carbon atoms and the ring numbers shown here are limited to the assignment of spectra here only. It should not be confused with the assignment in experimental part.

S78



9I

Spectrum: hsqc  
User: CEO Date: Tue May 17 09:07:37 2011  
Positive contours: low 2.70e+006 levels 8 factor 1.50  
Negative contours: low -5.00e+006 levels 1 factor 1.40

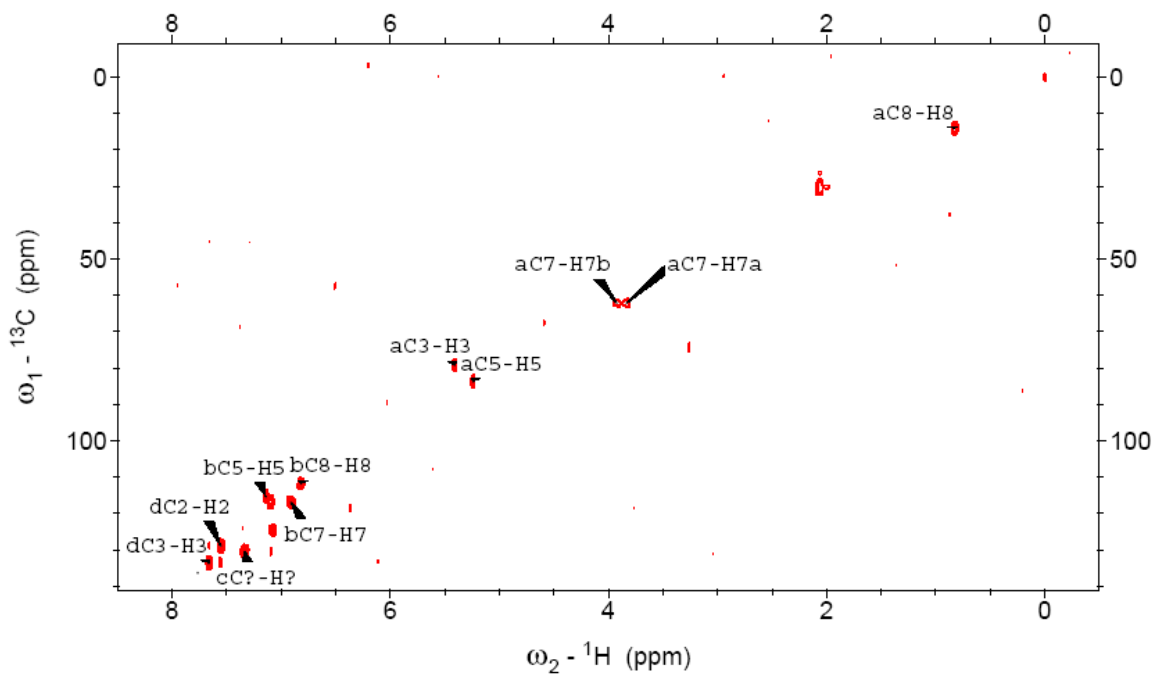

\* The numbering of carbon atoms and the ring numbers shown here are limited to the assignment of spectra here only. It should not be confused with the assignment in experimental part.

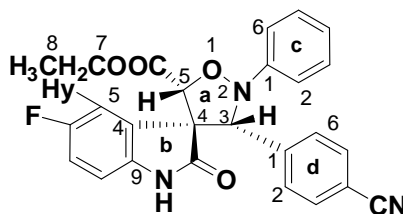

9I

Spectrum: hmbc  
User: CEO Date: Tue May 17 09:06:23 2011  
Positive contours: low 3.00e+006 levels 5 factor 1.70  
Negative contours: low -5.00e+006 levels 1 factor 1.40

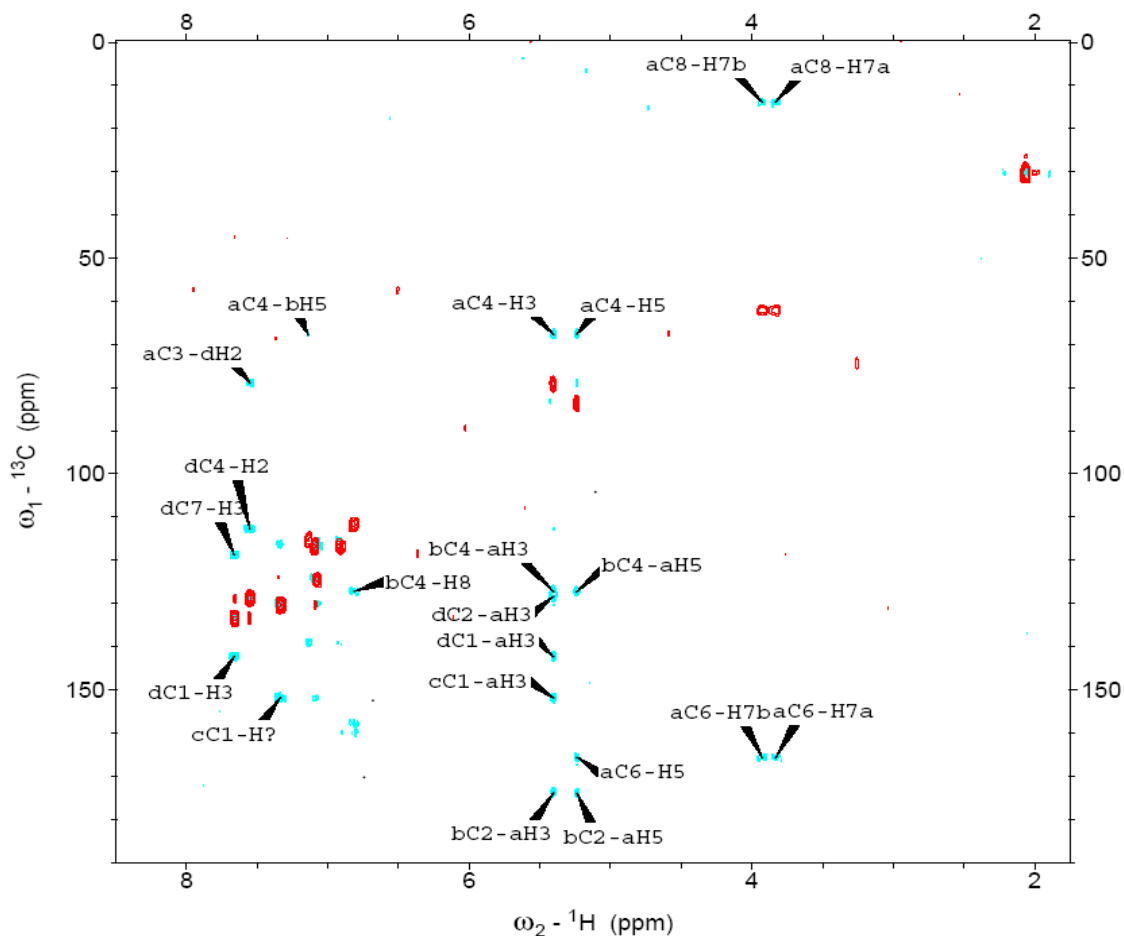

\* The numbering of carbon atoms and the ring numbers shown here are limited to the assignment of spectra here only. It should not be confused with the assignment in experimental part.

S80



9l

Spectrum: noesy300  
User: CEO Date: Tue May 17 09:11:08 2011  
Positive contours: low 3.00e+004 levels 5 factor 1.80  
Negative contours: low -5.00e+004 levels 1 factor 1.40

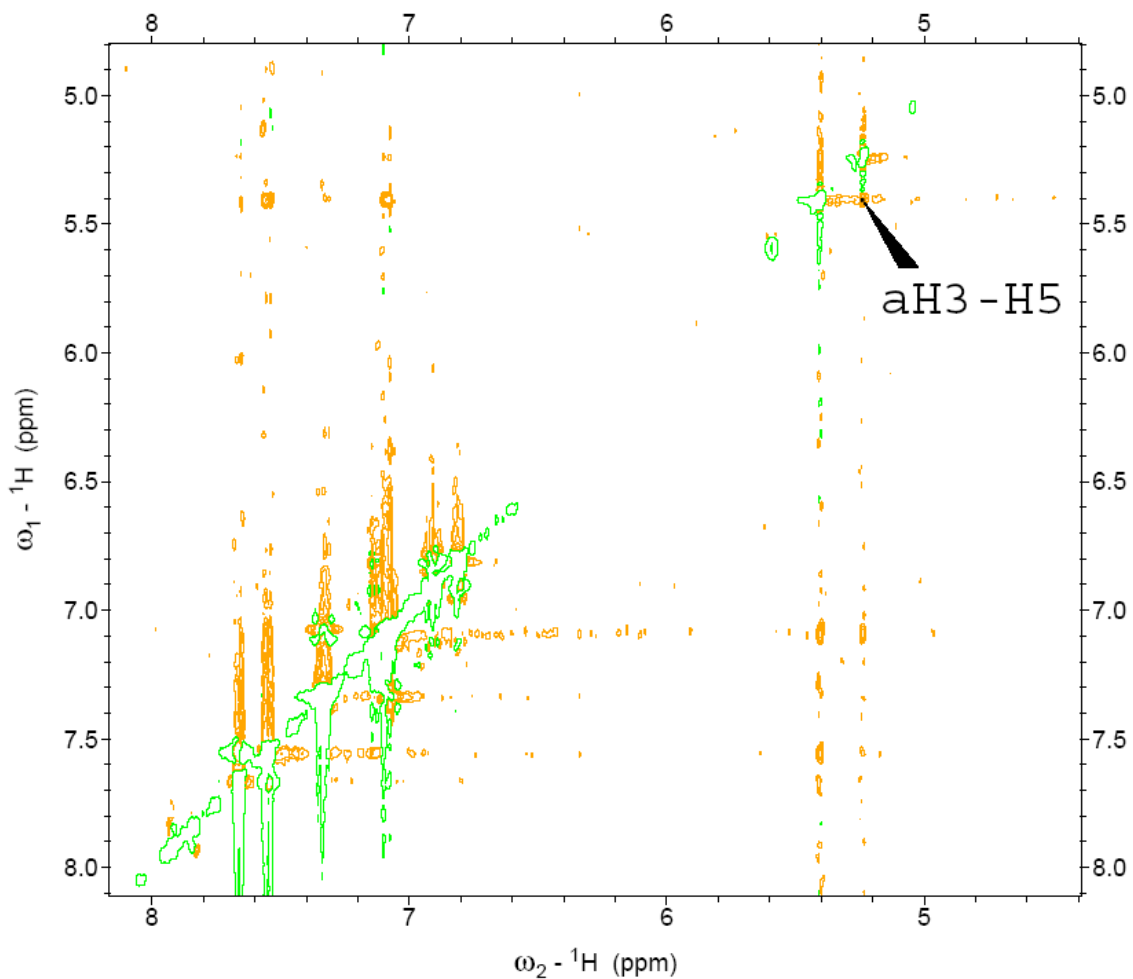

\* The numbering of carbon atoms and the ring numbers shown here are limited to the assignment of spectra here only. It should not be confused with the assignment in experimental part.



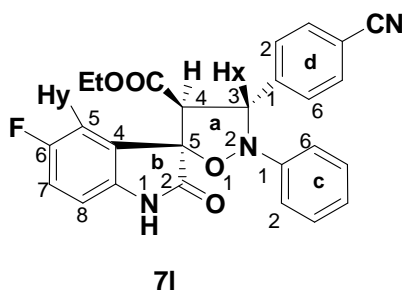

Spectrum: cosy  
User: CEO Date: Tue May 17 09:15:46 2011  
Positive contours: low 7.00e+006 levels 5 factor 2.00  
Negative contours: low -4.46e+008 levels 1 factor 1.40

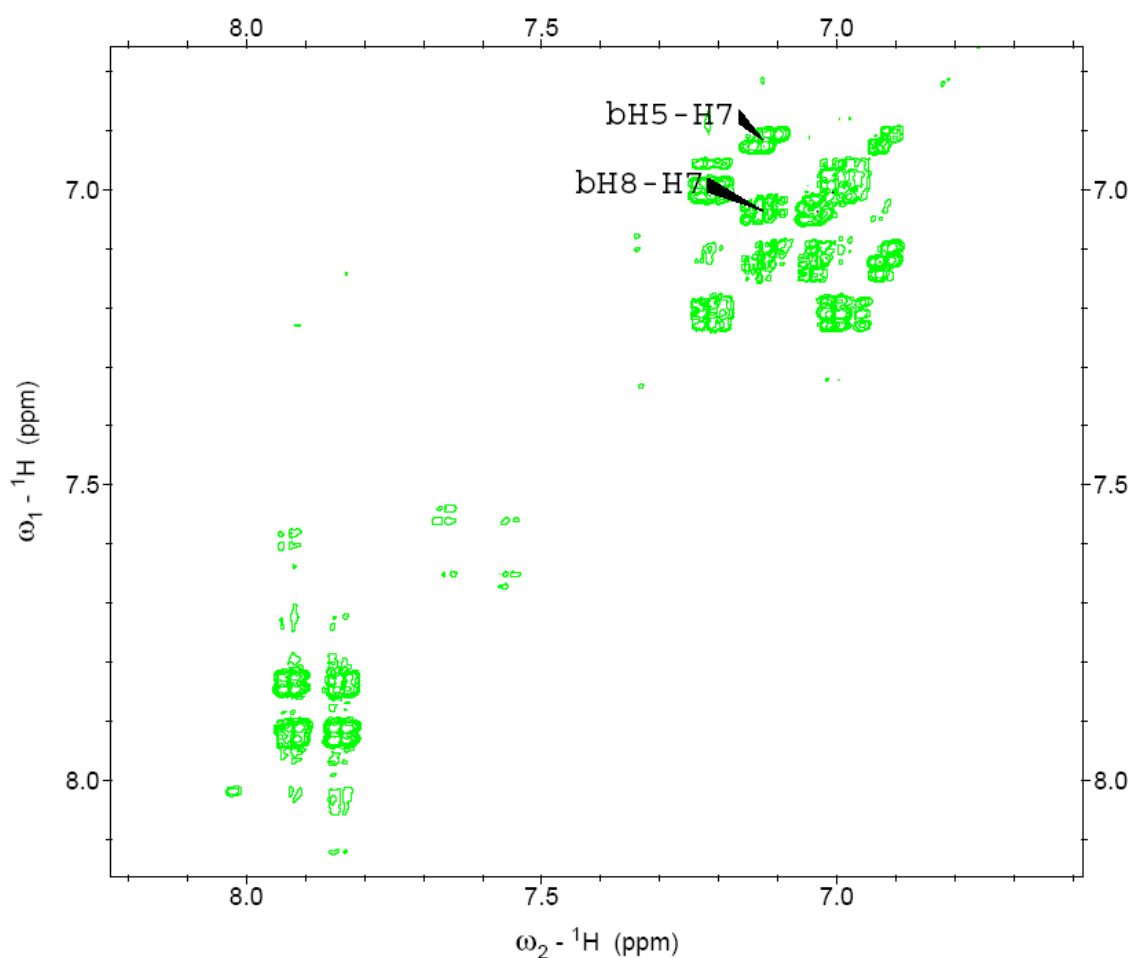

\* The numbering of carbon atoms and the ring numbers shown here are limited to the assignment of spectra here only. It should not be confused with the assignment in experimental part.

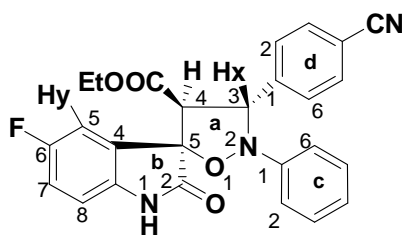

71

Spectrum: hsqc  
User: CEO Date: Tue May 17 09:15:20 2011  
Positive contours: low 4.00e+006 levels 5 factor 1.80  
Negative contours: low -6.00e+006 levels 1 factor 1.40

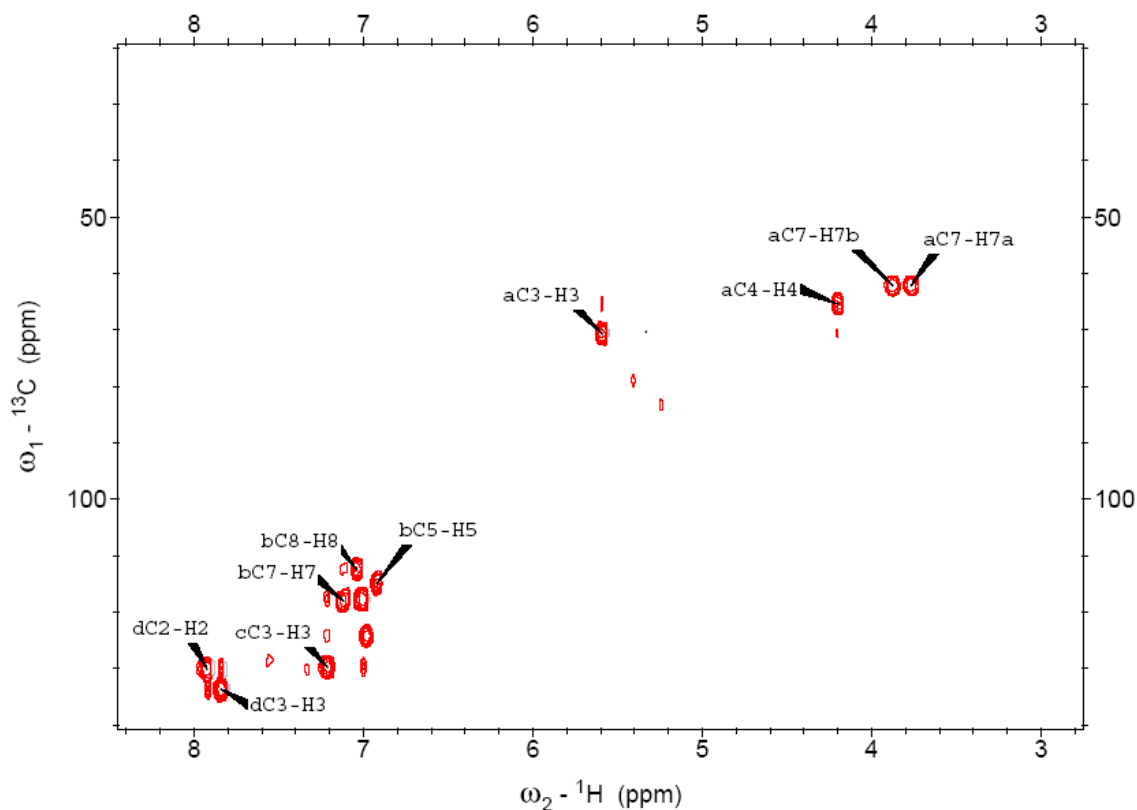

\* The numbering of carbon atoms and the ring numbers shown here are limited to the assignment of spectra here only. It should not be confused with the assignment in experimental part.

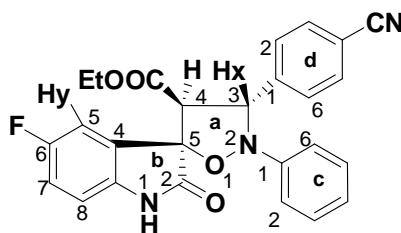

71

Spectrum: hmbc  
User: CEO Date: Tue May 17 09:14:51 2011  
Positive contours: low 4.00e+006 levels 5 factor 1.80  
Negative contours: low -1.00e+007 levels 1 factor 1.40

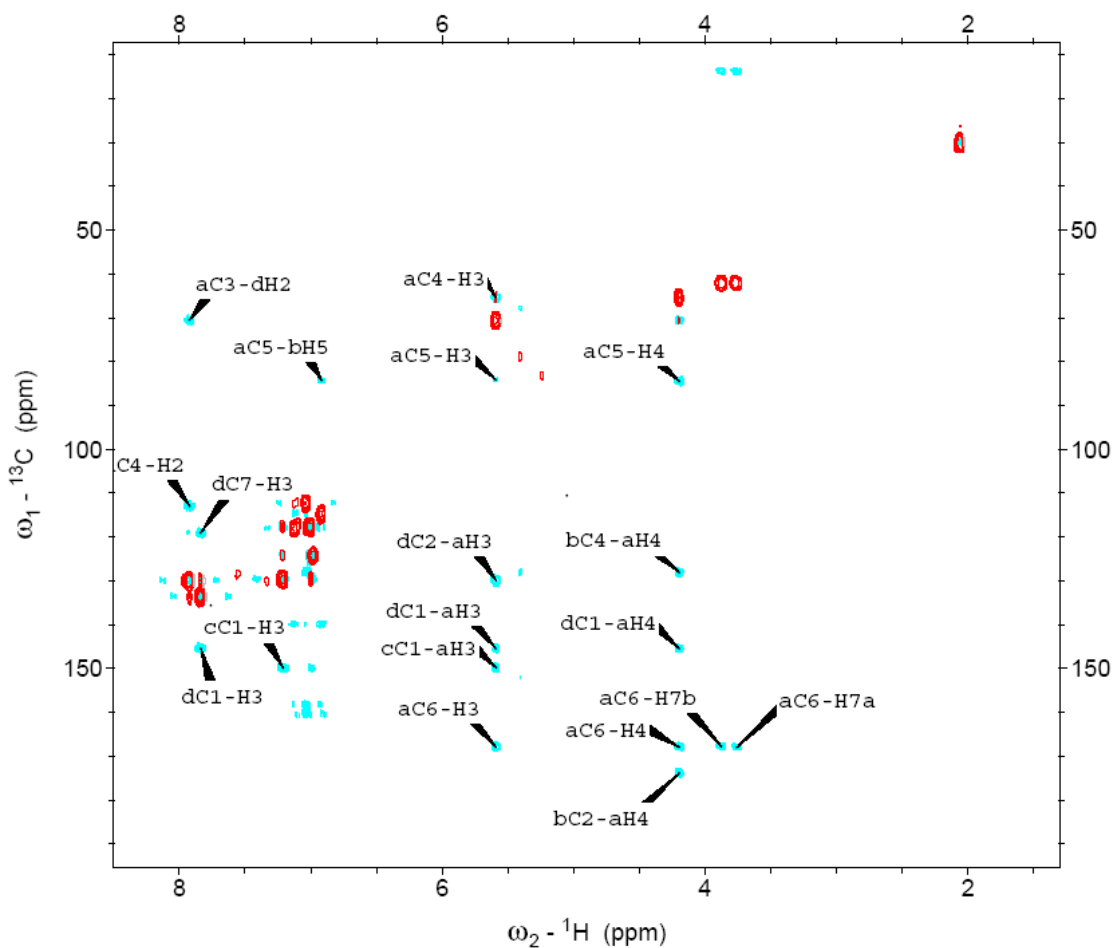

\* The numbering of carbon atoms and the ring numbers shown here are limited to the assignment of spectra here only. It should not be confused with the assignment in experimental part.

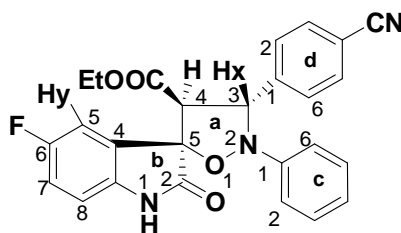

71

Spectrum: noesy300  
User: CEO Date: Tue May 17 09:16:21 2011  
Positive contours: low 2.00e+005 levels 5 factor 1.60  
Negative contours: low -1.00e+006 levels 5 factor 1.40

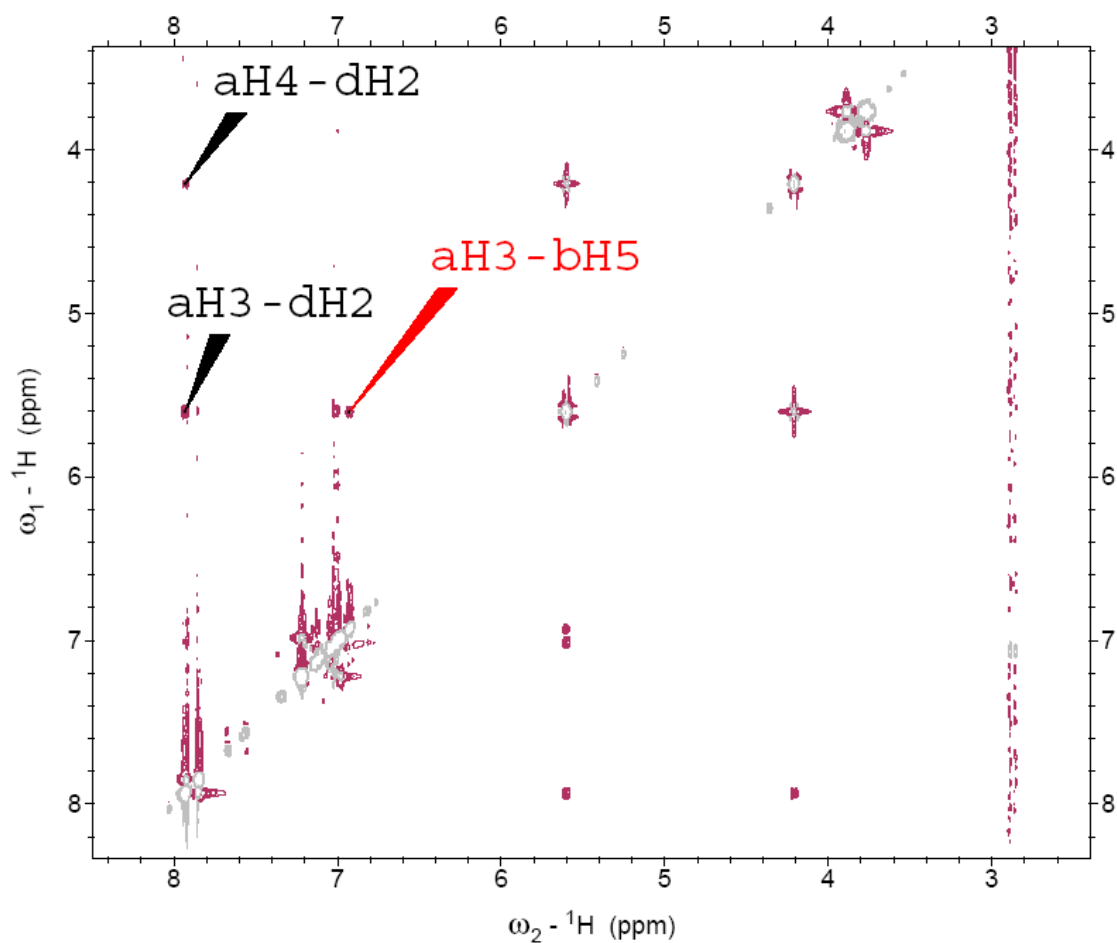

\* The numbering of carbon atoms and the ring numbers shown here are limited to the assignment of spectra here only. It should not be confused with the assignment in experimental part.
